# Supplementary material
Source: publisher figshare collection journal article supplement (https://gsapubs.figshare.com/ndownloader/files/23298299)
Supplement: Supplementary file 1 [file 23298299]

## Sheet: Composite DO7-8
Probe (n=195)	Distance (mm)	δ18O (‰ VPDB)		Age (a BP)	Upper 95% Confidence Limit	Lower 95% Confidence Limit								Years between samples
Composite	0.5	-9.30413		35704.6	36026.6	35008.3								6.90912
HOL-16	0.75	-9.1012		35711.5	36029.5	35043.7								6.4536
+	1	-8.98692		35717.9	36032.5	35076.6								5.94449
HOL-17	1.25	-8.97667		35723.9	36035.5	35096								5.3818
	1.5	-8.9819		35729.2	36038.5	35109								4.76553
	1.75	-8.97633		35734	36041.3	35119.8								4.09567
	2	-8.95548		35738.1	36043.9	35128.2								3.37223
	2.25	-8.96052		35741.5	36046.2	35133.8								2.59521
	2.5	-8.89293		35744.1	36048	35136.3								1.80079
	2.75	-8.80952		35745.9	36049.5	35136.3								1.13375
	3	-8.77038		35747	36050.5	35136.3								0.630271
	3.25	-8.89506		35747.6	36051.1	35136.3								0.290357
	3.5	-9.0755		35747.9	36051.3	35136.3								0.114007
	3.75	-9.03329		35748	36051.3	35136.3								0.101222
	4	-8.83006		35748.1	36051.3	35136.3								0.252
	4.25	-8.59716		35748.4	36051.3	35136.3								0.566343
	4.5	-8.50654		35749	36051.3	35136.3								1.0039
	4.75	-8.53219		35750	36051.3	35136.3								1.22799
	5	-8.53862		35751.2	36051.3	35136.3		U-Th Ages (n=10)						0.862051
	5.25	-8.59896		35752.1	36051.3	35136.3		depth	age	uncertainty				0.983198
	5.5	-8.61455		35753	36051.3	35137.8		2	35832	694				1.06508
	5.75	-8.64187		35754.1	36051.3	35140.8		4.75	37325	4048				1.10769
	6	-8.7108		35755.2	36051.3	35145.4		9	36100	752				1.11103
	6.25	-8.71657		35756.3	36051.3	35151.3		12.5	36701	3772				1.0751
	6.5	-8.68872		35757.4	36051.3	35158.5		14.25	35576	406				1.0061
	6.75	-8.5619		35758.4	36051.3	35166.8		18	35867	850				0.928803
	7	-8.55417		35759.3	36051.3	35175.9		23.16	35898	150				0.849412
	7.25	-8.55222		35760.2	36051.3	35176.4		23.52	36037	130				0.767923
	7.5	-8.61989		35761	36051.3	35183.4		24.75	36173	255				0.684338
	7.75	-8.65187		35761.6	36051.3	35191.6		31	37147	549				0.598656
	8	-8.68031		35762.2	36051.3	35198.6								0.510876
	8.25	-8.63151		35762.7	36051.3	35203.9								0.420999
	8.5	-8.53366		35763.2	36051.3	35206.9								0.329205
	8.75	-8.50693		35763.5	36051.3	35207.3								0.236207
	9	-8.52288		35763.7	36051.3	35207.3								0.142185
	9.25	-8.57078		35763.9	36051.3	35207.3								0.0471388
	9.5	-8.59224		35763.9	36051.3	35207.3								0.0151325
	9.75	-8.5601		35763.9	36051.3	35207.3								0.0151325
	10	-8.58038		35764	36051.3	35207.3								0.0151325
	10.25	-8.66162		35764	36051.3	35207.3								0.0151325
	10.5	-8.84682		35764	36051.3	35207.3								0.0151325
	10.75	-8.95883		35764	36051.3	35207.3								0.0151325
	11	-8.86782		35764	36051.3	35207.3								0.0151325
	11.25	-8.76947		35764	36051.3	35207.3								0.0151325
	11.5	-8.74178		35764	36051.3	35207.3								0.0151325
	11.75	-8.765		35764.1	36051.3	35208.2								0.0151325
	12	-8.64844		35764.1	36051.3	35210.5								0.0151325
	12.25	-8.63869		35764.1	36051.3	35211.4								0.00544769
	12.344	-8.45365		35764.1	36051.3	35211.4								0.00968479
	12.5	-8.504		35764.1	36051.3	35211.4								0.00968479
	12.656	-8.25002		35764.1	36051.3	35211.4								0.00544769
	12.75	-8.51457		35764.1	36051.3	35211.4								0.0151325
	13	-8.4688		35764.1	36051.3	35211.4								0.0151325
	13.25	-8.80415		35764.2	36051.3	35211.4								0.0151325
	13.5	-8.89796		35764.2	36051.3	35211.4								0.00786889
	13.6259	-8.82046		35764.2	36051.3	35214.4								0.00726359
	13.75	-8.88203		35764.2	36051.3	35217.3								0.0151325
	14	-8.8762		35764.2	36051.3	35222.1								0.0151325
	14.25	-9.09269		35764.2	36051.3	35224.7								0.0151325
	14.5	-9.06364		35764.2	36051.3	35224.7								0.200424
	14.584	-8.8566		35764.4	36051.4	35224.7								0.39442
	14.6975	-8.74459		35764.8	36051.4	35224.7								0.196197
	14.75	-8.62806		35765	36051.5	35224.7								0.543536
	14.8732	-8.75817		35765.6	36051.6	35224.7								0.698353
	15	-9.00465		35766.3	36051.8	35224.7								0.545889
	15.0889	-9.19511		35766.8	36051.9	35224.7								1.08682
	15.25	-9.33374		35767.9	36052.2	35224.7								1.06266
	15.3912	-9.53062		35769	36052.4	35224.7								0.900856
	15.5	-9.79308		35769.9	36052.6	35224.7								2.23429
	15.75	-10.1768		35772.1	36053.2	35224.7						Max		0.188643
	15.7744	-10.2843		35772.3	36053.2	35224.7						Min		2.2564
	16	-10.4472		35774.5	36053.7	35224.7								2.47785
	16.2326	-10.4565		35777	36054.2	35224.7								0.42359
	16.25	-10.6525		35777.4	36054.2	35224.7								5.37296
	16.5	-10.7037		35782.8	36054.7	35224.7								5.45043
	16.75	-10.8173		35788.3	36055.1	35225.3								0.218962
	16.7602	-10.7828		35788.5	36055.1	35225.3								5.2694
	17	-10.7659		35793.7	36055.3	35228.9								5.50288
	17.25	-10.7209		35799.3	36055.6	35235								2.19997
	17.3512	-10.7463		35801.5	36055.6	35238								3.294
	17.5	-10.8014		35804.7	36055.7	35243								5.46163
	17.75	-10.9351		35810.2	36055.7	35252.3								5.40587
	18	-11.0735		35815.6	36055.7	35262.2								5.32668
	18.25	-11.183		35820.9	36055.7	35272.2								5.22407
	18.5	-11.2178		35826.2	36055.7	35287.9								4.09766
	18.698	-11.0618		35830.3	36055.7	35301.7								1.01605
	18.75	-11.1008		35831.3	36055.7	35305								5.05835
	19	-11.0505		35836.3	36055.7	35320.9								5.07367
	19.25	-11.2207		35841.4	36055.7	35336.5								3.70221
	19.426	-11.0125		35845.1	36055.7	35348.1								1.45746
	19.5	-11.0655		35846.6	36055.7	35352.8								5.31634
	19.75	-11.0323		35851.9	36055.7	35370.7								5.54369
	20	-11.267		35857.4	36055.7	35391.3								3.69992
	20.1622	-11.1066		35861.1	36055.7	35406.4								2.1418
	20.25	-11.2119		35863.3	36055.7	35415.6								6.21042
	20.5	-11.2033		35869.5	36055.7	35444.4								6.64467
	20.75	-11.3768		35876.1	36055.7	35478.5								3.6421
	20.8846	-11.159		35879.8	36055.7	35497.9								3.4818
	21	-11.133		35883.3	36055.7	35516.7								7.64298
	21.25	-11.149		35890.9	36056.1	35557.8								8.20192
	21.5	-11.3458		35899.1	36057.1	35600.2								8.8007
	21.75	-11.4509		35907.9	36058.8	35642.7								9.43932
	22	-11.3291		35917.3	36061.5	35683.8								10.1178
	22.25	-11.3251		35927.5	36065.3	35722.1								10.8361
	22.5	-11.2161		35938.3	36070.6	35756.3								11.6744
	22.75	-11.2674		35950	36077.4	35785.5								12.9531
	23	-11.1918		35962.9	36090.3	35810.4								14.7523
	23.25	-10.9767		35977.7	36110.5	35832.4								17.0721
	23.5	-10.9062		35994.7	36134.2	35852.9								5.26676
	23.5698	-10.8033		36000	36141.4	35858.5								14.6455
	23.75	-10.8426		36014.7	36161.3	35873.1								9.79532
	23.8601	-10.7782		36024.4	36174.3	35882.3								13.4777
	24	-10.8244		36037.9	36191.9	35894.5								9.30126
	24.0882	-10.7867		36047.2	36203.9	35902.7								17.8531
	24.25	-10.7799		36065.1	36226.2	35918.3								2.35561
	24.267	-10.7134		36067.4	36229.1	35920.4								17.3005
	24.4095	-10.7032		36084.7	36250	35935.5								11.9001
	24.5	-10.691		36096.6	36264.1	35945.9								4.10682
	24.5289	-10.6246		36100.7	36268.9	35949.6								15.6371
	24.638	-10.5995		36116.4	36286.9	35963.5								16.4826
	24.75	-10.594		36132.9	36305.6	35978.2								20.4542
	24.8756	-10.6538		36153.3	36328.6	35996.6								19.7038
	25	-10.6629		36173	36350.4	36014.3								3.35279
	25.0164	-10.6618		36176.4	36354.1	36017.4								25.6946
	25.1718	-10.6723		36202.1	36382.5	36040.4								14.051
	25.25	-10.7222		36216.1	36398	36053								16.0444
	25.3412	-10.8026		36232.2	36415.7	36067.3								29.0035
	25.5	-10.7253		36261.2	36447.8	36093								3.65837
	25.5239	-10.8254		36264.8	36451.9	36096.2								36.8095
	25.7193	-10.8348		36301.6	36493.1	36128.3								5.53859
	25.75	-10.8292		36307.2	36499.4	36133.1								33.1618
	25.9268	-10.745		36340.3	36537.4	36161.2								12.8122
	26	-10.6482		36353.1	36552.3	36171.9								27.1566
	26.1457	-10.7394		36380.3	36584.5	36194								17.794
	26.25	-10.6991		36398.1	36606	36208.2								22.641
	26.3754	-10.8545		36420.7	36634.1	36225.7								20.2954
	26.5	-10.9477		36441	36660	36240.7								19.6304
	26.6152	-11.1023		36460.7	36685.9	36254.7								20.5483
	26.75	-11.0244		36481.2	36714	36268.6								16.8539
	26.8646	-10.9845		36498.1	36737.7	36279.5								20.8139
	27	-10.8808		36518.9	36767.8	36292.2								17.3339
	27.1228	-10.8619		36536.2	36793.6	36302.3								18.3175
	27.25	-10.8519		36554.5	36821.5	36312.5								19.2682
	27.3893	-10.8809		36573.8	36851.6	36322.6								14.861
	27.5	-10.9231		36588.7	36875.2	36330.1								21.2722
	27.6634	-10.9752		36609.9	36909.5	36340.4								11.8293
	27.75	-11.0281		36621.8	36928.9	36345.9								24.774
	27.9446	-11.073		36646.5	36969.7	36357.3								7.79416
	28	-11.0806		36654.3	36982.6	36360.8								29.9166
	28.232	-11.0328		36684.2	37032.1	36374.3								2.61254
	28.25	-11.0545		36686.9	37036.4	36375.5								32.9846
	28.5	-11.0746		36719.8	37090.3	36390.8								4.01203
	28.5252	-11.1637		36723.9	37096.8	36392.7								29.8115
	28.75	-11.1307		36753.7	37144.3	36407.4								9.61754
	28.8234	-11.0901		36763.3	37159.5	36412.2								24.9851
	29	-11.0063		36788.3	37198.5	36425.1								18.2447
	29.1261	-11.098		36806.5	37226.7	36434.8								16.9666
	29.25	-11.1168		36823.5	37252.8	36443.8								25.6332
	29.4326	-11.1533		36849.1	37291.9	36457.7								10.0161
	29.5	-11.0458		36859.1	37307.1	36463.2								34.477
	29.7423	-11.0022		36893.6	37359.3	36482.1								1.43966
	29.75	-11.0027		36895	37361.5	36482.8								36.0135
	30	-11.0268		36931.1	37415.8	36502.6								7.19931
	30.0545	-11.0072		36938.3	37426.7	36506.6								28.7404
	30.25	-11.0073		36967	37470.1	36522.3								17.1748
	30.3686	-10.9825		36984.2	37496.1	36531.6								18.5206
	30.5	-10.9756		37002.7	37524.3	36541.5								25.4695
	30.684	-10.9555		37028.2	37563.3	36554.9								9.85356
	30.75	-10.8742		37038	37578.5	36560								34.9933
	31	-10.945		37073	37632.5	36578								34.7488
	31.25	-10.914		37107.8	37686.4	36595.5								34.5895
	31.5	-10.9734		37142.4	37740.3	36612.7								17.9519
	31.6314	-11.0597		37160.3	37768.3	36621.5								16.5635
	31.75	-11.0064		37176.9	37794.2	36629.7								27.6162
	31.9455	-11.0563		37204.5	37837.2	36643.1								6.91029
	32	-10.8526		37211.4	37848	36646.5								34.6229
	32.25	-10.8714		37246	37901.8	36663.4								1.38812
	32.2577	-10.8574		37247.4	37903.9	36664.1								33.4163
	32.5	-10.873		37280.8	37955.5	36680.4								9.78881
	32.5674	-10.9098		37290.6	37970.6	36685.2								25.2571
	32.75	-10.8735		37315.9	38009.4	36697.6								16.8974
	32.8739	-10.9442		37332.8	38035.2	36706								18.3492
	33	-10.9328		37351.1	38063.2	36715.1								25.4648
	33.1766	-10.9407		37376.6	38102	36727.8								9.91652
	33.25	-10.8762		37386.5	38117.1	36732.7								31.1945
	33.4748	-10.8657		37417.7	38164.6	36748.3								4.25543
	33.5	-10.8007		37421.9	38171.1	36750.4								35.4525
	33.75	-10.7879		37457.4	38225.3	36768.2								2.83433
	33.768	-10.7672		37460.2	38229.6	36769.7								32.5547
	34	-10.7613		37492.8	38279.6	36786.1								8.4766
	34.0554	-10.7476		37501.3	38292.6	36790.3								26.783
	34.25	-10.7339		37528	38334.1	36803.8								12.649
	34.3366	-10.6672		37540.7	38353.7	36810.2								22.415
	34.5	-10.5878		37563.1	38388.8	36821.6								15.3511
	34.6107	-10.5215		37578.5	38412.9	36829.3
													Max	36.8095
													Min	0.00544769

## Sheet: HÖL-7 DO9-10
Probe (n=26)	Distance from top (mm)	δ18O (‰ VPDB)		Age (a BP)	Upper 95% Confidence Limit	Lower 95% Confidence Limit								Years between samples
HOL7-151	37.25	-8.80607		40105.1	42597.3	38043.3								17.9637
HOL7-152	37.5	-8.60729		40123.1	42619.1	38049.4								19.5563
HOL7-153	37.75	-8.64252		40142.6	42643.8	38056								22.2823
HOL7-154	38	-8.5146		40164.9	42672.5	38063.3								25.8123
HOL7-155	38.25	-8.57207		40190.7	42706	38071.6								28.8295
HOL7-156	38.5	-8.70683		40219.6	42743.6	38080.8								31.0048
HOL7-157	38.75	-8.64448		40250.6	42784.6	38090.5								32.3381
HOL7-158	39	-8.7749		40282.9	42854.7	38100.7								32.8295
HOL7-159	39.25	-9.52604		40315.7	42943.6	38111.1								32.4788
HOL7-160	39.5	-10.2519		40348.2	43033	38121.6								31.2862
HOL7-161	39.75	-10.4255		40379.5	43121	38132								29.2517
HOL7-162	40	-10.5232		40408.7	43205.7	38142								26.6192
HOL7-163	40.25	-10.5748		40435.4	43285.7	38151.6								24.3649
HOL7-164	40.5	-10.5519		40459.7	43361.3	38160.6								44.456
HOL7-166	41	-10.663		40504.2	43503.5	38176.8								21.3355
HOL7-167	41.25	-10.6724		40525.5	43572.1	38183.9								21.5702
HOL7-168	41.5	-10.6382		40547.1	43640.3	38190.2								22.4271
HOL7-169	41.75	-10.5975		40569.5	43709	38195.7								23.9062
HOL7-170	42	-10.7221		40593.4	43779.3	38200.3		U-Th Ages (n=4)						25.8187
HOL7-171	42.25	-10.7211		40619.2	43851.8	38204.1		depth	age	uncertainty				27.4089
HOL7-172	42.5	-10.6602		40646.7	43926.2	38207.2		20	38094	1877				28.4877
HOL7-173	42.75	-10.6931		40675.1	44001.9	38210		24	39881	3827				29.0554
HOL7-174	43	-10.7628		40704.2	44078.1	38212.7		30	39693	5445				29.1117
HOL7-175	43.25	-10.8835		40733.3	44154.3	38215.6		37	39319	2603				28.6569
HOL7-176	43.5	-10.8416		40762	44229.7	38219								27.6907
HOL7-177	43.75	-10.8121		40789.7	44303.9	38223.2
													Max	44.456
													Min	17.9637
												Max
												Min

## Sheet: HÖL-7 DO11-12
Probe (n=141)	Distance from top (mm)	δ18O (‰ VPDB)		Age (a BP)	Upper 95% Confidence Limit	Lower 95% Confidence Limit								Years between samples
HOL7-182	45	-7.89849		43594.1	44144.4	41861.5								7.82418
HOL7-183	45.25	-7.99016		43602	44146.6	41896.6								7.77074
HOL7-184	45.5	-7.91231		43609.7	44148.9	41931.7								7.75528
HOL7-185	45.75	-8.05941		43617.5	44151.2	41966.9								7.77777
HOL7-186	46	-7.75723		43625.3	44153.6	42002.1								7.83824
HOL7-187	46.25	-7.81057		43633.1	44156	42037.2								7.93667
HOL7-188	46.5	-8.15203		43641	44158.4	42072.4								8.07306
HOL7-189	46.75	-8.29073		43649.1	44160.9	42107.5								8.24742
HOL7-190	47	-8.08412		43657.4	44163.3	42142.6								8.43703
HOL7-191	47.25	-7.89909		43665.8	44165.7	42177.6								8.55106
HOL7-192	47.5	-7.94681		43674.3	44168.2	42212.5								8.56678
HOL7-193	47.75	-7.81514		43682.9	44170.6	42247.4								8.48422
HOL7-194	48	-8.12234		43691.4	44173	42282.3								8.30335
HOL7-195	48.25	-8.22474		43699.7	44175.4	42317.1								8.02419
HOL7-196	48.5	-8.03367		43707.7	44177.7	42351.9								7.64673
HOL7-197	48.75	-8.0779		43715.4	44180.1	42386.6								7.17097
HOL7-198	49	-8.00354		43722.5	44182.5	42421.4								6.62981
HOL7-199	49.25	-7.91117		43729.2	44184.8	42456.1								6.15487
HOL7-200	49.5	-7.74373		43735.3	44187.2	42490.9		U-Th Ages (n=4)						5.77903
HOL7-201	49.75	-7.90211		43741.1	44189.6	42525.7		depth	age	uncertainty				5.5023
HOL7-202	50	-7.93839		43746.6	44192	42560.5		52	44564	2123				5.32468
HOL7-203	50.25	-7.79737		43751.9	44194.4	42595.3		60	44146	282				5.24616
HOL7-204	50.5	-7.75332		43757.2	44196.9	42630.2		64.5	43905	733				5.26676
HOL7-205	50.75	-7.84521		43762.4	44199.3	42665.2		69.5	43826	697				5.38647
HOL7-206	51	-7.99557		43767.8	44201.9	42700.2								5.59011
HOL7-207	51.25	-8.03031		43773.4	44204.5	42735.2								5.81698
HOL7-208	51.5	-7.77021		43779.2	44207	42770.3								6.05191
HOL7-209	51.75	-7.87084		43785.3	44209.3	42805.4								6.29491
HOL7-210	52	-8.05437		43791.6	44211.1	42840.4								6.54596
HOL7-211	52.25	-8.23321		43798.1	44212	42875.3								6.80508
HOL7-212	52.5	-7.93555		43804.9	44212.6	42910.1								7.07225
HOL7-213	52.75	-8.01915		43812	44213	42944.6								7.34749
HOL7-214	53	-7.98765		43819.4	44213	42979								7.63019
HOL7-215	53.25	-8.07907		43827	44213	43013								7.91802
HOL7-216	53.5	-8.11693		43834.9	44213	43046.8								8.21037
HOL7-217	53.75	-8.22027		43843.1	44213	43080.5								8.50725
HOL7-218	54	-8.03944		43851.6	44213	43114.2								8.80865
HOL7-219	54.25	-8.03958		43860.4	44213	43147.9								9.11458
HOL7-220	54.5	-8.00602		43869.5	44213.1	43181.7								9.42504
HOL7-221	54.75	-8.305		43879	44213.8	43215.7								9.74003
HOL7-222	55	-8.35737		43888.7	44215.1	43249.9								10.043
HOL7-223	55.25	-8.13998		43898.8	44219.2	43284.4								10.2677
HOL7-224	55.5	-8.53815		43909	44224.8	43319								10.3976
HOL7-225	55.75	-8.56681		43919.4	44231.2	43353.4								10.4327
HOL7-226	56	-8.59624		43929.9	44238.2	43387.3								10.3729
HOL7-227	56.25	-8.21763		43940.2	44245.2	43420.5								10.2184
HOL7-228	56.5	-8.29885		43950.4	44251.9	43452.6								9.96899
HOL7-229	56.75	-9.69952		43960.4	44257.8	43483.5								9.62481
HOL7-230	57	-9.97506		43970	44262.6	43512.7								9.20956
HOL7-231	57.25	-9.79941		43979.2	44265.9	43540.2								8.81821
HOL7-232	57.5	-9.9252		43988.1	44268	43566								8.47449
HOL7-233	57.75	-10.2054		43996.5	44269	43590.4								8.17841
HOL7-234	58	-10.718		44004.7	44269.4	43613.4								7.92997
HOL7-235	58.25	-10.5305		44012.6	44269.4	43635.3								7.72917
HOL7-236	58.5	-10.5805		44020.4	44269.4	43656.3								7.576
HOL7-237	58.75	-10.4118		44028	44269.5	43676.5								7.47048
HOL7-238	59	-10.7893		44035.4	44270.2	43696.2								7.40245
HOL7-239	59.25	-10.7265		44042.8	44271.6	43715.4								7.33136
HOL7-240	59.5	-10.7796		44050.2	44273.9	43734.1								7.24707
HOL7-241	59.75	-10.586		44057.4	44277.3	43752.1								7.14957
HOL7-242	60	-10.55		44064.6	44281.7	43769.3								7.03887
HOL7-243	60.25	-10.5036		44071.6	44287.3	43785.5								6.91497
HOL7-244	60.5	-10.5377		44078.5	44294.2	43800.5								6.77787
HOL7-245	60.75	-10.6569		44085.3	44302.5	43814.4								6.62757
HOL7-246	61	-10.6949		44091.9	44312.2	43826.7								6.47126
HOL7-247	61.25	-10.5659		44098.4	44323.5	43837.6								6.33774
HOL7-248	61.5	-10.639		44104.7	44336.5	43847.1								6.2342
HOL7-249	61.75	-10.5411		44111	44351	43855.3								6.16064
HOL7-250	62	-10.7087		44117.1	44367.3	43862.4								6.11707
HOL7-251	62.25	-10.6019		44123.2	44385.4	43868.5								6.10348
HOL7-252	62.5	-10.4538		44129.3	44405.3	43873.7								6.11987
HOL7-253	62.75	-10.31		44135.5	44427.1	43878.3								6.16625
HOL7-254	63	-10.2473		44141.6	44450.7	43882.4								6.22422
HOL7-255	63.25	-10.348		44147.8	44476.2	43886								6.22027
HOL7-256	63.5	-10.305		44154.1	44502.5	43889.3								6.13601
HOL7-257	63.75	-10.0257		44160.2	44528.8	43892.3								5.97145
HOL7-258	64	-10.0691		44166.2	44553.9	43895.1								5.72657
HOL7-259	64.25	-10.2497		44171.9	44575.3	43897.6								5.40139
HOL7-260	64.5	-10.3018		44177.3	44585.1	43900.1								4.9959
HOL7-261	64.75	-10.3121		44182.3	44592.8	43902.4								4.5101
HOL7-262	65	-10.6175		44186.8	44597.8	43904.6								3.96954
HOL7-263	65.25	-10.6223		44190.8	44599.8	43906.8								3.4764
HOL7-264	65.5	-10.6549		44194.3	44599.8	43909								3.05624
HOL7-265	65.75	-10.5857		44197.3	44599.8	43911.1								2.70905
HOL7-266	66	-10.6934		44200	44599.8	43913								2.43483
HOL7-267	66.25	-10.3871		44202.5	44599.8	43914.7								2.23359
HOL7-268	66.5	-10.271		44204.7	44599.8	43916.2								2.10532
HOL7-269	66.75	-10.2752		44206.8	44599.8	43917.5								2.05003
HOL7-270	67	-10.3176		44208.8	44599.8	43918.4								2.06193
HOL7-271	67.25	-10.2607		44210.9	44599.8	43919								2.1179
HOL7-272	67.5	-10.196		44213	44599.8	43919.2								2.21217
HOL7-273	67.75	-10.2456		44215.2	44601	43919.3								2.34474
HOL7-274	68	-10.2904		44217.6	44603.4	43919.3								2.51561
HOL7-275	68.25	-10.3722		44220.1	44606.8	43919.3								2.72477
HOL7-276	68.5	-10.5425		44222.8	44611.2	43919.3								2.97223
HOL7-277	68.75	-10.4887		44225.8	44616.2	43919.5								3.25798
HOL7-278	69	-10.3393		44229.1	44621.9	43919.8								3.56154
HOL7-279	69.25	-10.3408		44232.6	44630.1	43920.5								3.80091
HOL7-280	69.5	-10.0962		44236.4	44642.8	43921.4								3.95561
HOL7-281	69.75	-10.1654		44240.4	44656	43922.6								4.02562
HOL7-282	70	-10.3396		44244.4	44669.5	43923.9								4.01096
HOL7-283	70.25	-10.1563		44248.4	44683.1	43925.3								3.91162
HOL7-284	70.5	-10.2048		44252.3	44696.6	43926.8								3.7276
HOL7-285	70.75	-10.2308		44256	44710	43928.3								3.4589
HOL7-286	71	-10.2484		44259.5	44722.9	43929.8								3.13332
HOL7-287	71.25	-10.3351		44262.6	44735.4	43931.3								2.86205
HOL7-288	71.5	-10.2876		44265.5	44747.3	43932.7								2.67287
HOL7-289	71.75	-10.2022		44268.2	44758.9	43934								2.56581
HOL7-290	72	-10.1911		44270.7	44770.2	43935.2								2.54084
HOL7-291	72.25	-10.1139		44273.3	44781.3	43936.4								2.59798
HOL7-292	72.5	-10.0063		44275.9	44792.3	43937.5								2.73723
HOL7-293	72.75	-10.177		44278.6	44803.2	43938.5								2.95857
HOL7-294	73	-10.36		44281.6	44814.2	43939.5								3.2365
HOL7-295	73.25	-10.5124		44284.8	44825.4	43940.4								3.46889
HOL7-296	73.5	-10.3678		44288.3	44836.7	43941.2								3.63024
HOL7-297	73.75	-10.2531		44291.9	44848.2	43942								3.72054
HOL7-298	74	-10.4427		44295.6	44859.7	43942.8								3.73979
HOL7-299	74.25	-10.3805		44299.4	44871.4	43943.5								3.68799
HOL7-300	74.5	-10.4056		44303.1	44883.1	43944.3								3.56513
HOL7-301	74.75	-10.4672		44306.6	44895	43945								3.37123
HOL7-302	75	-10.2778		44310	44906.8	43945.7								3.12491
HOL7-303	75.25	-10.348		44313.1	44918.8	43946.5								2.90073
HOL7-304	75.5	-10.45		44316	44930.8	43947.2								2.71732
HOL7-305	75.75	-10.525		44318.7	44943	43948								2.57468
HOL7-306	76	-10.491		44321.3	44955.3	43948.8								2.47281
HOL7-307	76.25	-10.4615		44323.8	44967.8	43949.6								2.41171
HOL7-308	76.5	-10.2736		44326.2	44980.5	43950.4								2.39138
HOL7-309	76.75	-10.2557		44328.6	44993.5	43951.3								2.41183
HOL7-310	77	-10.3716		44331	45006.8	43952.1								2.46203
HOL7-311	77.25	-10.3582		44333.5	45020.4	43953								2.49796
HOL7-312	77.5	-10.6198		44336	45034.4	43953.8								2.50859
HOL7-313	77.75	-10.615		44338.5	45048.5	43954.7								2.49395
HOL7-314	78	-10.4743		44341	45062.9	43955.6								2.45401
HOL7-315	78.25	-10.4198		44343.4	45077.3	43956.5								2.38878
HOL7-316	78.5	-10.3963		44345.8	45091.9	43957.5								2.29827
HOL7-317	78.75	-10.4288		44348.1	45106.5	43958.4								2.18247
HOL7-318	79	-10.4032		44350.3	45121.1	43959.4								2.05791
HOL7-319	79.25	-10.3793		44352.3	45135.6	43960.4								1.99073
HOL7-320	79.5	-10.4569		44354.3	45150	43961.4								1.99746
HOL7-321	79.75	-10.3563		44356.3	45164.4	43962.4								2.07809
HOL7-322	80	-10.2836		44358.4	45178.7	43963.5
												Max		10.4327
												Min		1.99073

## Sheet: HÖL-7 DO12-13
Probe (n=363)	Distance from top (mm)	δ18O (‰ VPDB)		Age (a BP)	Upper 95% Confidence Limit	Lower 95% Confidence Limit								Years between samples
HOL7-469	116.75	-9.23544		46485.5	47064.5	45798.5								2.73612
HOL7-470	117	-9.29836		46488.3	47064.9	45804.3								2.67175
HOL7-471	117.25	-9.33157		46491	47065.4	45810								2.64126
HOL7-472	117.5	-9.07422		46493.6	47065.8	45815.7								2.64465
HOL7-473	117.75	-9.0318		46496.2	47066.2	45821.2								2.68191
HOL7-474	118	-8.8811		46498.9	47066.6	45826.6								2.75305
HOL7-475	118.25	-8.84981		46501.7	47067	45832								2.85807
HOL7-476	118.5	-8.72067		46504.5	47067.3	45835.4								2.99697
HOL7-477	118.75	-8.60254		46507.5	47067.5	45838								3.15699
HOL7-478	119	-8.46724		46510.7	47067.7	45840.6								3.28711
HOL7-479	119.25	-8.51644		46514	47067.9	45843.3								3.37459
HOL7-480	119.5	-8.63074		46517.3	47068.1	45845.9								3.41943
HOL7-481	119.75	-8.87917		46520.8	47068.3	45848.5								3.42161
HOL7-482	120	-8.94442		46524.2	47068.6	45851.2								3.38115
HOL7-483	120.25	-9.07913		46527.6	47069.1	45853.9								3.29805
HOL7-484	120.5	-9.10531		46530.9	47069.8	45856.7								3.17229
HOL7-485	120.75	-8.94697		46534	47070.7	45859.6								3.01653
HOL7-486	121	-8.92453		46537.1	47071.9	45862.6								2.88128
HOL7-487	121.25	-8.98725		46539.9	47073.2	45865.6		U-Th Ages (n=6)						2.77918
HOL7-488	121.5	-8.97585		46542.7	47074.8	45868.8		depth	age	uncertainty				2.71023
HOL7-489	121.75	-8.87324		46545.4	47076.4	45871.9		122	46778	661				2.67444
HOL7-490	122	-8.87178		46548.1	47078	45875.2		155	46072	1047				2.67179
HOL7-491	122.25	-8.86071		46550.8	47079.5	45878.4		175	47510	2406				2.7023
HOL7-492	122.5	-9.02173		46553.5	47080.8	45881.6		180	47315	323				2.76596
HOL7-493	122.75	-8.88465		46556.2	47082	45884.8		190	47422	1883				2.85615
HOL7-494	123	-8.91647		46559.1	47082.9	45888		201	48411	426				2.94634
HOL7-495	123.25	-8.80465		46562	47083.6	45891.1								3.02992
HOL7-496	123.5	-8.7573		46565.1	47084.1	45894.2								3.10688
HOL7-497	123.75	-8.8377		46568.2	47084.5	45897.3								3.17723
HOL7-498	124	-8.8108		46571.4	47084.8	45900.3								3.24096
HOL7-499	124.25	-8.80612		46574.6	47085.2	45903.4								3.29807
HOL7-500	124.5	-8.77417		46577.9	47085.6	45906.3								3.34856
HOL7-501	124.75	-8.86204		46581.2	47086.1	45909.3								3.39003
HOL7-502	125	-8.93526		46584.6	47086.7	45912.2								3.4128
HOL7-503	125.25	-8.83137		46588.1	47087.6	45915.1								3.41446
HOL7-504	125.5	-8.9731		46591.5	47088.5	45918								3.39501
HOL7-505	125.75	-8.96077		46594.9	47089.6	45920.8								3.35444
HOL7-506	126	-8.84157		46598.2	47090.8	45923.6								3.29277
HOL7-507	126.25	-8.81804		46601.5	47092.1	45926.3								3.20999
HOL7-508	126.5	-8.7506		46604.7	47093.5	45928.9								3.10609
HOL7-509	126.75	-8.51351		46607.8	47095	45931.5								2.98771
HOL7-510	127	-8.78846		46610.8	47096.5	45933.9								2.88136
HOL7-511	127.25	-9.00978		46613.7	47098.1	45936.3								2.79365
HOL7-512	127.5	-8.77894		46616.5	47099.6	45938.7								2.7246
HOL7-513	127.75	-8.85148		46619.2	47101.2	45940.9								2.67419
HOL7-514	128	-8.63828		46621.9	47102.7	45943.2								2.64243
HOL7-515	128.25	-8.75186		46624.5	47104.2	45945.4								2.62933
HOL7-516	128.5	-8.76345		46627.2	47105.6	45947.6								2.63487
HOL7-517	128.75	-8.74766		46629.8	47107	45949.8								2.65634
HOL7-518	129	-8.60256		46632.4	47108.2	45952.1								2.68288
HOL7-519	129.25	-8.7071		46635.1	47109.4	45954.3								2.71177
HOL7-520	129.5	-8.6542		46637.8	47110.5	45956.5								2.74301
HOL7-521	129.75	-8.62031		46640.6	47111.6	45958.8								2.77659
HOL7-522	130	-8.64966		46643.4	47112.8	45961.1								2.81252
HOL7-523	130.25	-8.63875		46646.2	47113.9	45963.4								2.8508
HOL7-524	130.5	-8.40064		46649	47115.2	45965.8								2.89142
HOL7-525	130.75	-8.6942		46651.9	47116.6	45968.2								2.92886
HOL7-526	131	-8.67028		46654.8	47118.1	45970.6								2.94098
HOL7-527	131.25	-8.80188		46657.8	47119.7	45972.9								2.92224
HOL7-528	131.5	-8.66433		46660.7	47121.4	45974.9								2.87265
HOL7-529	131.75	-8.72089		46663.6	47123.2	45976.4								2.7922
HOL7-530	132	-8.5743		46666.4	47124.9	45977.2								2.6809
HOL7-531	132.25	-8.59664		46669.1	47126.6	45977.2								2.53874
HOL7-532	132.5	-8.84913		46671.6	47128.2	45977.2								2.36572
HOL7-533	132.75	-8.71904		46674	47129.6	45977.2								2.17254
HOL7-534	133	-8.77146		46676.1	47130.9	45977.2								2.00193
HOL7-535	133.25	-8.72869		46678.1	47132.1	45977.2								1.86458
HOL7-536	133.5	-8.68405		46680	47133.3	45977.2								1.76049
HOL7-537	133.75	-8.5573		46681.8	47134.3	45977.2								1.68967
HOL7-538	134	-8.41536		46683.4	47135.4	45977.2								1.6521
HOL7-539	134.25	-8.5604		46685.1	47136.5	45977.2								1.6478
HOL7-540	134.5	-8.60395		46686.7	47137.8	45977.2								1.67676
HOL7-541	134.75	-8.49059		46688.4	47139.1	45977.2								1.73079
HOL7-542	135	-8.62715		46690.2	47140.6	45977.2								1.77717
HOL7-543	135.25	-8.62194		46691.9	47142.1	45977.2								1.80769
HOL7-544	135.5	-8.61833		46693.7	47143.8	45977.2								1.82237
HOL7-545	135.75	-8.69217		46695.6	47145.4	45977.2								1.82119
HOL7-546	136	-8.69491		46697.4	47146.9	45977.2								1.80417
HOL7-547	136.25	-8.78338		46699.2	47148.3	45977.2								1.77131
HOL7-548	136.5	-8.92436		46701	47149.5	45977.2								1.72259
HOL7-549	136.75	-8.88634		46702.7	47150.5	45977.2								1.65799
HOL7-550	137	-8.69027		46704.3	47151.1	45977.2								1.57735
HOL7-551	137.25	-8.78051		46705.9	47151.5	45977.2								1.48063
HOL7-552	137.5	-8.83012		46707.4	47151.7	45977.2								1.36783
HOL7-553	137.75	-8.8888		46708.8	47151.7	45977.2								1.23895
HOL7-554	138	-8.93696		46710	47151.7	45977.2								1.094
HOL7-555	138.25	-9.02611		46711.1	47151.7	45977.2								0.932963
HOL7-556	138.5	-9.06664		46712	47151.7	45977.2								0.755849
HOL7-557	138.75	-8.86504		46712.8	47151.8	45977.2								0.57321
HOL7-558	139	-8.78886		46713.4	47152.1	45977.2								0.427263
HOL7-559	139.25	-8.96699		46713.8	47152.5	45977.2								0.328562
HOL7-560	139.5	-9.07479		46714.1	47153.1	45977.2								0.277106
HOL7-561	139.75	-8.54503		46714.4	47153.7	45977.2								0.272896
HOL7-562	140	-8.54025		46714.7	47154.4	45977.2								0.315932
HOL7-563	140.25	-8.63396		46715	47155.2	45977.2								0.406214
HOL7-564	140.5	-8.5143		46715.4	47156	45977.2								0.512452
HOL7-565	140.75	-8.37533		46715.9	47156.8	45977.2								0.355115
HOL7-566	141	-8.37323		46716.3	47157.6	45977.2								0.416275
HOL7-567	141.25	-8.57595		46716.7	47158.4	45977.2								0.446209
HOL7-568	141.5	-8.62092		46717.1	47159.2	45977.2								0.444916
HOL7-569	141.75	-8.60316		46717.6	47160.1	45977.2								0.412397
HOL7-570	142	-8.50236		46718	47161.1	45977.2								0.348652
HOL7-571	142.25	-8.47131		46718.3	47162.2	45977.2								0.25368
HOL7-572	142.5	-8.38967		46718.6	47163.4	45977.2								0.127481
HOL7-573	142.75	-8.28863		46718.7	47164.8	45977.2								0.00514151
HOL7-574	143	-8.39376		46718.7	47166.4	45977.2								0.00514151
HOL7-575	143.25	-8.57755		46718.7	47168.2	45977.2								0.00514151
HOL7-576	143.5	-8.57406		46718.7	47170	45977.2								0.00514151
HOL7-577	143.75	-8.49167		46718.7	47171.8	45977.2								0.00514151
HOL7-578	144	-8.58598		46718.7	47173.6	45977.2								0.00514151
HOL7-579	144.25	-8.62489		46718.7	47175.3	45977.2								0.00514151
HOL7-580	144.5	-8.64263		46718.7	47176.8	45977.2								0.00514151
HOL7-581	144.75	-8.52404		46718.7	47178.2	45977.2								0.00514151
HOL7-582	145	-8.3542		46718.8	47179.3	45977.2								0.00514151
HOL7-583	145.25	-8.21551		46718.8	47180.2	45977.2								0.00514151
HOL7-584	145.5	-8.3996		46718.8	47181.1	45977.2								0.00514151
HOL7-585	145.75	-8.45214		46718.8	47181.9	45977.2								0.00514151
HOL7-586	146	-8.5231		46718.8	47182.8	45977.2								0.170493
HOL7-587	146.25	-8.44974		46718.9	47183.9	45977.2								0.281523
HOL7-588	146.5	-8.50646		46719.2	47185.2	45977.2								0.399929
HOL7-589	146.75	-8.59909		46719.6	47186.9	45977.2								0.519513
HOL7-590	147	-8.64289		46720.1	47188.9	45977.2								0.615482
HOL7-591	147.25	-8.66965		46720.8	47191.3	45977.2								0.681638
HOL7-592	147.5	-8.68228		46721.4	47194	45977.2								1.33537
HOL7-593	147.75	-8.73509		46722.8	47196.9	45977.2								1.44902
HOL7-594	148	-8.69439		46724.2	47199.9	45977.2								1.40246
HOL7-595	148.25	-8.51164		46725.6	47203	45977.2								1.29627
HOL7-596	148.5	-8.61403		46726.9	47206.2	45977.2								1.13045
HOL7-597	148.75	-8.48756		46728.1	47209.3	45977.2								0.919045
HOL7-598	149	-8.5561		46729	47212.2	45977.2								0.71818
HOL7-599	149.25	-8.31422		46729.7	47215.1	45977.2								0.541894
HOL7-600	149.5	-8.33694		46730.2	47217.8	45977.2								0.390185
HOL7-601	149.75	-8.57169		46730.6	47220.4	45977.2								0.263054
HOL7-602	150	-8.58215		46730.9	47222.9	45977.2								0.160501
HOL7-603	150.25	-8.46595		46731	47225.3	45977.2								0.0752161
HOL7-604	150.5	-8.66293		46731.1	47227.5	45977.2								0.014564
HOL7-605	150.75	-8.76665		46731.1	47229.5	45977.2								0.00184918
HOL7-606	151	-8.65987		46731.1	47231.5	45977.5								0.00184918
HOL7-607	151.25	-8.89476		46731.1	47233.3	45978.1								0.00184918
HOL7-608	151.5	-8.81592		46731.1	47235	45979								0.00184918
HOL7-609	151.75	-8.68637		46731.1	47236.7	45980								0.00184918
HOL7-610	152	-8.47241		46731.1	47238.3	45981.1								0.0446965
HOL7-611	152.25	-8.56692		46731.2	47240	45982.1								0.109687
HOL7-612	152.5	-8.38298		46731.3	47241.7	45983.1								0.17558
HOL7-613	152.75	-8.64285		46731.5	47243.5	45983.5								0.254556
HOL7-614	153	-8.799		46731.7	47245.4	45983.5								0.344829
HOL7-615	153.25	-8.68566		46732.1	47247.3	45983.5								0.445951
HOL7-616	153.5	-8.5878		46732.5	47249.4	45983.5								0.557922
HOL7-617	153.75	-8.50683		46733.1	47251.6	45983.5								0.680742
HOL7-618	154	-8.37788		46733.8	47253.9	45983.5								0.814412
HOL7-619	154.25	-8.65314		46734.6	47256.3	45983.5								0.958931
HOL7-620	154.5	-8.74974		46735.5	47258.8	45983.5								1.1143
HOL7-621	154.75	-8.72764		46736.6	47261.3	45983.5								1.27082
HOL7-622	155	-8.54146		46737.9	47264	45983.8								1.38972
HOL7-623	155.25	-8.56921		46739.3	47266.7	45984.2								1.46129
HOL7-624	155.5	-8.6259		46740.8	47269.4	45984.8								1.48554
HOL7-625	155.75	-8.69573		46742.3	47272.1	45985.5								1.46246
HOL7-626	156	-8.53213		46743.7	47274.9	45986.4								1.39207
HOL7-627	156.25	-8.28896		46745.1	47277.6	45987.4								1.27435
HOL7-628	156.5	-8.46301		46746.4	47280.2	45988.4								1.10931
HOL7-629	156.75	-8.32751		46747.5	47282.8	45989.6								0.913931
HOL7-630	157	-8.47977		46748.4	47285.3	45990.8								0.756143
HOL7-631	157.25	-8.31796		46749.2	47287.7	45992								0.65293
HOL7-632	157.5	-8.57873		46749.8	47290.1	45993.3								0.604292
HOL7-633	157.75	-8.45883		46750.4	47292.4	45994.7								0.610229
HOL7-634	158	-8.50517		46751	47294.8	45996.1								0.67074
HOL7-635	158.25	-8.3963		46751.7	47297.3	45997.6								0.785827
HOL7-636	158.5	-8.30027		46752.5	47299.9	45999.1								0.955489
HOL7-637	158.75	-8.41958		46753.4	47302.6	46000.7								1.16921
HOL7-638	159	-8.37894		46754.6	47305.5	46002.4								1.38494
HOL7-639	159.25	-8.57276		46756	47308.5	46004.1								1.59216
HOL7-640	159.5	-8.38903		46757.6	47311.5	46005.9								1.79087
HOL7-641	159.75	-8.59812		46759.4	47314.7	46007.6								1.98108
HOL7-642	160	-8.80517		46761.4	47317.8	46009.3								2.16278
HOL7-643	160.25	-8.72864		46763.5	47320.9	46010.9								2.33597
HOL7-644	160.5	-8.55752		46765.9	47324	46012.5								2.50065
HOL7-645	160.75	-8.55347		46768.4	47326.9	46013.9								2.66027
HOL7-646	161	-8.54419		46771	47329.7	46015.1								2.82857
HOL7-647	161.25	-8.56984		46773.9	47332.4	46016.3								3.00901
HOL7-648	161.5	-8.52423		46776.9	47335.2	46017.7								3.20159
HOL7-649	161.75	-8.56136		46780.1	47338	46019.2								3.40629
HOL7-650	162	-8.63157		46783.5	47341	46021.1								3.62312
HOL7-651	162.25	-8.22912		46787.1	47344.3	46023.4								3.85209
HOL7-652	162.5	-8.24737		46790.9	47347.9	46026.4								4.09319
HOL7-653	162.75	-8.50852		46795	47352	46030.1								4.33612
HOL7-654	163	-8.73174		46799.4	47356.5	46034.6								4.53964
HOL7-655	163.25	-8.82727		46803.9	47361.4	46039.8								4.69346
HOL7-656	163.5	-8.94763		46808.6	47366.5	46045.6								4.79757
HOL7-657	163.75	-8.94582		46813.4	47371.7	46052								4.85198
HOL7-658	164	-9.05119		46818.3	47376.9	46058.7								4.85668
HOL7-659	164.25	-9.14683		46823.1	47381.9	46065.7								4.81167
HOL7-660	164.5	-8.85106		46827.9	47386.6	46072.8								4.71696
HOL7-661	164.75	-8.89597		46832.6	47390.9	46079.9								4.59195
HOL7-662	165	-8.82915		46837.2	47394.6	46087								4.51427
HOL7-663	165.25	-8.85438		46841.7	47397.9	46094								4.50334
HOL7-664	165.5	-8.92695		46846.2	47400.9	46101								4.55914
HOL7-665	165.75	-9.04528		46850.8	47403.8	46107.9								4.68169
HOL7-666	166	-9.23805		46855.5	47406.7	46114.8								4.87099
HOL7-667	166.25	-9.20224		46860.4	47409.8	46122.3								5.12702
HOL7-668	166.5	-9.17075		46865.5	47413.2	46136								5.4498
HOL7-669	166.75	-8.88305		46870.9	47417.1	46149.8								5.8229
HOL7-670	167	-8.84372		46876.8	47421.6	46163.7								6.18063
HOL7-671	167.25	-9.02359		46882.9	47426.6	46177.6								6.50658
HOL7-672	167.5	-9.19864		46889.4	47431.9	46191.6								6.80075
HOL7-673	167.75	-9.28109		46896.2	47437.4	46205.6								7.06313
HOL7-674	168	-9.42103		46903.3	47442.9	46219.8								7.29372
HOL7-675	168.25	-9.63184		46910.6	47448.4	46234								7.49253
HOL7-676	168.5	-9.40739		46918.1	47453.7	46248.2								7.65955
HOL7-677	168.75	-9.74426		46925.8	47458.6	46262.5								7.79317
HOL7-678	169	-8.88232		46933.6	47463	46276.9								7.88686
HOL7-679	169.25	-8.65503		46941.4	47467	46291.3								7.93901
HOL7-680	169.5	-9.35757		46949.4	47470.7	46305.9								7.94962
HOL7-681	169.75	-9.89156		46957.3	47474.1	46320.5								7.91868
HOL7-682	170	-10.2489		46965.2	47477.3	46335.2								7.8462
HOL7-683	170.25	-10.3568		46973.1	47480.4	46350								7.73217
HOL7-684	170.5	-10.4192		46980.8	47483.5	46365								7.5766
HOL7-685	170.75	-10.4323		46988.4	47486.7	46380.1								7.3956
HOL7-686	171	-10.3153		46995.8	47489.9	46395.3								7.25365
HOL7-687	171.25	-10.371		47003	47493.4	46410.7								7.16686
HOL7-688	171.5	-10.2205		47010.2	47496.9	46426.3								7.13523
HOL7-689	171.75	-9.84351		47017.4	47500.7	46441.9								7.15876
HOL7-690	172	-9.80332		47024.5	47504.6	46457.7								7.23745
HOL7-691	172.25	-10.059		47031.7	47508.7	46473.7								7.3713
HOL7-692	172.5	-9.92616		47039.1	47513	46489.8								7.56032
HOL7-693	172.75	-9.69758		47046.7	47517.5	46506								7.78726
HOL7-694	173	-9.80852		47054.5	47522.1	46522.3								7.98319
HOL7-695	173.25	-10.441		47062.5	47527	46538.8								8.13088
HOL7-696	173.5	-10.5436		47070.6	47531.9	46555.3								8.23032
HOL7-697	173.75	-10.6037		47078.8	47537	46572								8.28152
HOL7-698	174	-10.1459		47087.1	47542.1	46588.8								8.28447
HOL7-699	174.25	-10.1222		47095.4	47547.1	46605.8								8.23918
HOL7-700	174.5	-10.0857		47103.6	47552.2	46622.8								8.14565
HOL7-701	174.75	-9.92627		47111.8	47557.1	46639.9								8.02047
HOL7-702	175	-9.98397		47119.8	47561.9	46657.2								7.93006
HOL7-703	175.25	-10.0846		47127.7	47566.7	46674.4								7.89101
HOL7-704	175.5	-10.0973		47135.6	47571.5	46691.5								7.90333
HOL7-705	175.75	-10.1252		47143.5	47576.4	46708.3								7.96701
HOL7-706	176	-9.95208		47151.5	47581.5	46724.8								8.08206
HOL7-707	176.25	-10.1562		47159.6	47586.9	46740.8								8.24848
HOL7-708	176.5	-10.2208		47167.8	47592.7	46756.2								8.46626
HOL7-709	176.75	-10.4317		47176.3	47598.8	46770.8								8.72003
HOL7-710	177	-10.4615		47185	47605.5	46784.7								8.94825
HOL7-711	177.25	-10.3392		47193.9	47612.6	46797.8								9.13553
HOL7-712	177.5	-10.2879		47203.1	47620	46810.2								9.28188
HOL7-713	177.75	-10.3274		47212.4	47627.6	46821.8								9.3873
HOL7-714	178	-10.4543		47221.7	47635.3	46832.8								9.45179
HOL7-715	178.25	-10.4962		47231.2	47643	46843.1								9.47534
HOL7-716	178.5	-10.6267		47240.7	47650.7	46852.8								9.45796
HOL7-717	178.75	-10.5696		47250.1	47658.2	46862								9.41702
HOL7-718	179	-9.9757		47259.5	47665.5	46870.7								9.42198
HOL7-719	179.25	-9.73692		47269	47672.7	46878.9								9.49022
HOL7-720	179.5	-10.1636		47278.5	47680	46886.6								9.62173
HOL7-721	179.75	-10.2921		47288.1	47687.8	46893.9								9.81652
HOL7-722	180	-10.1209		47297.9	47696	46900.7								10.0746
HOL7-723	180.25	-10.0585		47308	47705.1	46907.2								10.3959
HOL7-724	180.5	-10.7284		47318.4	47715.2	46913.2								10.7805
HOL7-725	180.75	-10.1791		47329.1	47726.5	46919								11.2084
HOL7-726	181	-10.1524		47340.4	47739.1	46924.3								11.5997
HOL7-727	181.25	-10.2411		47352	47752.8	46929.5								11.9344
HOL7-728	181.5	-10.2018		47363.9	47767.5	46934.4								12.2125
HOL7-729	181.75	-10.1869		47376.1	47782.7	46939.1								12.434
HOL7-730	182	-10.499		47388.5	47798.3	46943.8								12.599
HOL7-731	182.25	-10.5716		47401.1	47813.9	46948.4								12.7073
HOL7-732	182.5	-10.6375		47413.8	47829.3	46953								12.759
HOL7-733	182.75	-10.6625		47426.6	47844.2	46957.8								12.7603
HOL7-734	183	-10.3618		47439.4	47858.4	46962.7								12.7353
HOL7-735	183.25	-10.0385		47452.1	47872	46967.6								12.6902
HOL7-736	183.5	-9.8704		47464.8	47885.3	46972.6								12.625
HOL7-737	183.75	-9.76955		47477.4	47898.5	46977.6								12.5397
HOL7-738	184	-9.67592		47490	47911.7	46982.5								12.4344
HOL7-739	184.25	-9.91225		47502.4	47925.2	46987.3								12.3088
HOL7-740	184.5	-9.89434		47514.7	47939.2	46991.8								12.1632
HOL7-741	184.75	-10.1002		47526.9	47953.9	46996.1								12.0051
HOL7-742	185	-10.0658		47538.9	47969.4	47000.1								11.8652
HOL7-743	185.25	-9.85213		47550.7	47985.8	47003.8								11.7509
HOL7-744	185.5	-9.85176		47562.5	48003.1	47007.3								11.6624
HOL7-745	185.75	-9.83624		47574.1	48021.2	47010.5								11.5996
HOL7-746	186	-9.78548		47585.7	48040.2	47013.4								11.5626
HOL7-747	186.25	-9.93393		47597.3	48059.9	47016.2								11.5513
HOL7-748	186.5	-9.78893		47608.9	48080.5	47018.7								11.5658
HOL7-749	186.75	-9.43479		47620.4	48101.8	47021.2								11.6008
HOL7-750	187	-9.57313		47632	48123.8	47023.5								11.6361
HOL7-751	187.25	-9.93256		47643.7	48146.2	47025.7								11.6665
HOL7-752	187.5	-9.87395		47655.3	48168.7	47027.9								11.692
HOL7-753	187.75	-9.82825		47667	48190.8	47030.1								11.7125
HOL7-754	188	-9.73247		47678.7	48212.3	47032.4								11.7282
HOL7-755	188.25	-9.67024		47690.5	48232.8	47034.8								11.739
HOL7-756	188.5	-9.64402		47702.2	48251.9	47037.4								11.7448
HOL7-757	188.75	-9.76646		47713.9	48269.2	47040.2								11.7434
HOL7-758	189	-9.82998		47725.7	48284.6	47043.3								11.7253
HOL7-759	189.25	-9.87363		47737.4	48298.4	47046.6								11.6881
HOL7-760	189.5	-9.93729		47749.1	48311	47050								11.6319
HOL7-761	189.75	-9.96664		47760.7	48322.9	47053.5								11.5566
HOL7-762	190	-10.1445		47772.3	48334.5	47057								11.4622
HOL7-763	190.25	-9.86366		47783.7	48346.4	47060.4								11.3488
HOL7-764	190.5	-9.81077		47795.1	48359	47063.8								11.2164
HOL7-765	190.75	-9.84094		47806.3	48372.8	47067								11.0804
HOL7-766	191	-9.73931		47817.4	48387.9	47069.9								11.0035
HOL7-767	191.25	-9.69872		47828.4	48404.2	47072.6								11.0011
HOL7-768	191.5	-9.87716		47839.4	48421	47075.2								11.0732
HOL7-769	191.75	-9.86092		47850.5	48437.8	47077.5								11.2199
HOL7-770	192	-9.83657		47861.7	48454	47079.7								11.4412
HOL7-771	192.25	-9.97538		47873.1	48469.1	47081.8								11.737
HOL7-772	192.5	-9.75084		47884.9	48482.6	47083.8								12.1075
HOL7-773	192.75	-9.53436		47897	48493.8	47085.7								12.5377
HOL7-774	193	-9.95009		47909.5	48501.2	47087.6								12.9689
HOL7-775	193.25	-10.4256		47922.5	48504.3	47089.8								13.3862
HOL7-776	193.5	-10.2572		47935.9	48506.3	47092.6								13.7898
HOL7-777	193.75	-10.2255		47949.7	48507.4	47096.3								14.1796
HOL7-778	194	-10.2685		47963.8	48507.7	47101.3								14.5555
HOL7-779	194.25	-10.1935		47978.4	48507.7	47107.9								14.9177
HOL7-780	194.5	-10.0346		47993.3	48507.7	47116.3								15.2661
HOL7-781	194.75	-10.1467		48008.6	48507.7	47127.1								15.5848
HOL7-782	195	-10.1234		48024.2	48507.7	47140.4								15.8107
HOL7-783	195.25	-10.0944		48040	48507.7	47157.1								15.928
HOL7-784	195.5	-10.115		48055.9	48507.7	47177.9								15.9366
HOL7-785	195.75	-9.98515		48071.8	48507.7	47203.6								15.8366
HOL7-786	196	-10.1112		48087.7	48507.7	47234.8								15.6279
HOL7-787	196.25	-10.2023		48103.3	48508.4	47272.5								15.3106
HOL7-788	196.5	-10.1003		48118.6	48510.2	47317.3								14.8847
HOL7-789	196.75	-10.0796		48133.5	48513.3	47370								14.3817
HOL7-790	197	-10.0048		48147.9	48520.4	47430.8								13.9287
HOL7-791	197.25	-9.87876		48161.8	48532.3	47497.5								13.5572
HOL7-792	197.5	-9.89694		48175.4	48546.3	47567.4								13.2672
HOL7-793	197.75	-9.98933		48188.6	48562.2	47637.9								13.0588
HOL7-794	198	-10.1225		48201.7	48579.3	47706								12.9319
HOL7-795	198.25	-10.5613		48214.6	48597.2	47769.3								12.8866
HOL7-796	198.5	-10.7088		48227.5	48615.5	47824.8								12.9228
HOL7-797	198.75	-10.707		48240.4	48633.8	47869.9								13.021
HOL7-798	199	-10.7339		48253.5	48651.7	47902.7								13.1028
HOL7-799	199.25	-10.6984		48266.6	48669.1	47924.3								13.1485
HOL7-800	199.5	-10.6911		48279.7	48686.1	47936.1								13.1582
HOL7-801	199.75	-10.4916		48292.9	48702.9	47938.9								13.1319
HOL7-802	200	-10.6145		48306	48719.4	47939.2								13.0695
HOL7-803	200.25	-10.6659		48319.1	48735.8	47939.2								12.9711
HOL7-804	200.5	-10.6993		48332	48752.1	47939.2								12.8367
HOL7-805	200.75	-10.5512		48344.9	48768.4	47939.2								12.6777
HOL7-806	201	-10.315		48357.6	48784.8	47939.5								12.5395
HOL7-807	201.25	-10.2389		48370.1	48801.2	47941.2								12.4338
HOL7-808	201.5	-10.1663		48382.5	48817.7	47944.9								12.3603
HOL7-809	201.75	-10.2735		48394.9	48834.3	47952.1								12.3192
HOL7-810	202	-10.207		48407.2	48851	47960.4								12.3104
HOL7-811	202.25	-10.0827		48419.5	48867.9	47969.4								12.334
HOL7-812	202.5	-10.3309		48431.8	48884.9	47978.5								12.3899
HOL7-813	202.75	-10.3879		48444.2	48902	47987.1								12.4677
HOL7-814	203	-10.061		48456.7	48919.4	47995								12.5258
HOL7-815	203.25	-9.97449		48469.2	48936.9	48002.2								12.5537
HOL7-816	203.5	-10.048		48481.8	48954.6	48008.8								12.5514
HOL7-817	203.75	-9.99589		48494.3	48972.5	48014.9								12.5189
HOL7-818	204	-10.3438		48506.9	48990.7	48020.9								12.4563
HOL7-819	204.25	-10.3524		48519.3	49009.1	48026.8								12.3635
HOL7-820	204.5	-10.4789		48531.7	49027.7	48032.8								12.2405
HOL7-821	204.75	-10.3184		48543.9	49046.6	48039.2								12.099
HOL7-822	205	-10.1652		48556	49065.8	48045.9								11.985
HOL7-823	205.25	-10.1856		48568	49085.1	48053								11.9103
HOL7-824	205.5	-10.0555		48579.9	49104.6	48060.3								11.8748
HOL7-825	205.75	-10.1464		48591.8	49124.1	48067.7								11.8785
HOL7-826	206	-10.4332		48603.7	49143.7	48075.2								11.9214
HOL7-827	206.25	-10.2312		48615.6	49163.2	48082.5								12.0035
HOL7-828	206.5	-10.3078		48627.6	49182.5	48089.7								12.1248
HOL7-829	206.75	-10.3566		48639.7	49201.6	48096.5								12.271
HOL7-830	207	-10.5691		48652	49220.5	48102.9								12.3846
HOL7-831	207.25	-10.6264		48664.4	49239.1	48108.9
												Max		15.9366
												Min		0.00184918

## Sheet: Composite DO14-18
Probe (n=4150)	Distance from top (mm)	δ18O (‰ VPDB)		Age (a BP)	Upper 95% Confidence Limit	Lower 95% Confidence Limit								Years between samples
Composite	32.9408	-8.32093		49062.7	50197.3	47824.4								69.9071
HOL-7	33.8731	-8.40323		49132.6	50227.4	47937.9								68.9325
+	34.7976	-8.56047		49201.5	50257.3	48050.6								66.7549
HOL-16	35.7148	-8.5843		49268.3	50286.1	48162.1								11.2387
+	35.8707	-8.6667		49279.5	50290.9	48181.1								16.404
HOL-17	36.099	-8.64843		49295.9	50298	48208.9								16.4004
+	36.3275	-8.61007		49312.3	50305	48236.6								16.4938
HOL-18	36.556	-8.58507		49328.8	50312	48264.6								4.97776
	36.6255	-8.52423		49333.8	50314.1	48273								11.5628
	36.7845	-8.63437		49345.4	50319	48292.5								16.5396
	37.0132	-8.6741		49361.9	50326	48320.3								16.6975
	37.2418	-8.8235		49378.6	50333.1	48348.4								16.7782
	37.4706	-8.80467		49395.4	50340.1	48376.4								4.33504
	37.5301	-8.7599		49399.7	50342	48383.7								12.4436
	37.6994	-8.68363		49412.2	50347.2	48404.4								16.9198
	37.9282	-8.69643		49429.1	50354.4	48432.6								16.9811
	38.1571	-8.7241		49446.1	50361.6	48460.8								17.0359
	38.386	-8.7004		49463.1	50368.9	48489								3.20445
	38.4293	-8.54657		49466.3	50370.3	48494.3		U-Th Ages (n=35)						13.8797
	38.615	-8.4848		49480.2	50376.4	48517.3		depth	age	uncertainty				17.126
	38.8441	-8.45527		49497.3	50384	48545.7		44.75	50795	569				17.1612
	39.0732	-8.57743		49514.5	50391.7	48574.1		53.5	50426	187				17.1873
	39.3023	-8.58987		49531.7	50399.5	48602.6		60.25	51066	168				1.65215
	39.3237	-8.46017		49533.3	50400.2	48605.4		62.13	51338	204				15.5501
	39.5315	-8.37333		49548.9	50407.4	48631.2		63.46	52093	1046				17.2812
	39.7607	-8.34327		49566.1	50415.3	48659.8		66	51313	226				17.1987
	39.99	-8.43277		49583.3	50423.2	48688.4		79.25	52422	458				0.750693
	40	-8.46003		49584.1	50423.6	48689.6		86.08	52269	251				16.0546
	40.2138	-8.3579		49600.1	50430.9	48716.3		93	52249	257				0.374835
	40.2193	-8.41907		49600.5	50431	48716.9		106.75	52623	1748				2.32366
	40.25	-8.3108		49602.8	50432.1	48720.8		126.75	54214	1040				14.9015
	40.4486	-8.53817		49617.7	50438.8	48745.6		151.75	54937	2400				3.8143
	40.5	-8.39623		49621.6	50440.5	48751.9		155.5	54982	279				13.295
	40.678	-8.5972		49634.8	50446.3	48774.1		155.96	54783	274				5.36909
	40.75	-8.48383		49640.2	50448.6	48783		156.17	54422	2089				11.6881
	40.9074	-8.65323		49651.9	50453.6	48802.5		159.25	55319	194				6.90976
	41	-8.59367		49658.8	50456.4	48814		163	55529	191				7.4185
	41.1004	-8.5707		49666.2	50459.5	48826.4		163.5	55387	202				2.74205
	41.1368	-8.46497		49669	50460.6	48831		164.89	55864	219				8.36571
	41.25	-8.48497		49677.3	50464	48844.9		170.5	55980	466				8.5754
	41.3663	-8.53057		49685.9	50467.4	48859.3		174.46	55905	957				9.89241
	41.5	-8.5846		49695.8	50471.3	48875.8		176.75	56065	322				7.07935
	41.5958	-8.58163		49702.9	50474.1	48887.6		183	56126	325				11.3454
	41.75	-8.6337		49714.2	50478.5	48906.6		188	56897	740				5.52131
	41.8253	-8.57323		49719.8	50480.7	48915.8		189.25	57137	3100				11.6988
	41.9839	-8.5293		49731.5	50485.2	48935.4		194.25	57275	2689				1.17687
	42	-8.47737		49732.6	50485.6	48937.4		214.25	58637	4800				4.04514
	42.0548	-8.4932		49736.7	50487.2	48944.1		225	59708	1840				3.08871
	42.0973	-8.25783		49739.8	50488.4	48949.3		249.25	60394	270				11.2507
	42.25	-8.26267		49751	50492.8	48968.1		261.1	61795	5564				2.50019
	42.2844	-8.24913		49753.5	50493.8	48972.3		278.5	62211	391				9.41364
	42.4122	-8.2443		49762.9	50497.6	48988.1		289.21	62744	245				6.47372
	42.5	-8.22877		49769.4	50500.2	48998.9		312.25	62991	242				1.0301
	42.514	-8.3238		49770.4	50500.6	49000.6		342.25	63546	255				15.5339
	42.7255	-8.33837		49786	50506.9	49026.6		358.06	64276	485				1.39977
	42.7436	-8.33807		49787.4	50507.5	49029								0.442074
	42.75	-8.27887		49787.8	50507.7	49029.7								8.47708
	42.865	-8.5534		49796.3	50511.3	49043.9								7.96889
	42.9732	-8.5403		49804.3	50514.7	49057.2								1.9935
	43	-8.51327		49806.2	50515.6	49060.5								2.7326
	43.0373	-8.3366		49809	50516.8	49065.1								12.2692
	43.2029	-8.33087		49821.3	50522.2	49085.6								3.47611
	43.25	-8.32817		49824.7	50523.8	49091.4								7.25046
	43.3479	-8.3482		49832	50527.1	49103.5								6.29056
	43.4326	-8.33103		49838.3	50530	49114								4.95918
	43.5	-8.31503		49843.2	50532.3	49122.2								11.6211
	43.6574	-8.25817		49854.8	50537.7	49141.5								0.370072
	43.6622	-8.28507		49855.2	50537.9	49142.1								6.06859
	43.7444	-8.516		49861.3	50540.7	49152.1								0.443989
	43.75	-8.62597		49861.7	50540.9	49152.8								10.5046
	43.8919	-8.7611		49872.2	50545.9	49170.1								5.47117
	43.966	-8.39087		49877.7	50548.5	49179.1								2.51289
	44	-8.43037		49880.2	50549.7	49183.2								9.01137
	44.1216	-8.32937		49889.2	50553.9	49197.8								9.44353
	44.25	-8.4361		49898.7	50558.4	49213.1								1.76921
	44.2737	-8.28453		49900.4	50559.3	49216								5.67274
	44.3513	-8.34287		49906.1	50561.9	49225.1								10.9605
	44.5	-8.3403		49917.1	50567.1	49242.5								5.94802
	44.5808	-8.44055		49923	50569.9	49252								3.00767
	44.6225	-8.61968		49926	50571.2	49256.7								9.37554
	44.75	-8.64215		49935.4	50575.6	49271.4								4.45989
	44.8108	-8.83		49939.9	50577.6	49278.3								5.54869
	44.8875	-8.3725		49945.4	50580.1	49286.9								8.23254
	45	-8.3587		49953.6	50583.8	49299.5								2.98084
	45.0405	-8.4419		49956.6	50585.1	49304.1								11.0831
	45.1938	-8.76497		49967.7	50589.9	49320.8								4.03677
	45.25	-8.80457		49971.7	50591.6	49326.9								1.43868
	45.2703	-8.80683		49973.2	50592.3	49329.1								16.4079
	45.5	-8.93914		49989.6	50599.2	49353.6								16.0901
	45.7297	-9.22031		50005.7	50606	49377.6								5.23073
	45.8062	-8.92791		50010.9	50608.2	49385.5								10.3799
	45.9595	-8.93693		50021.3	50612.6	49401.1								2.74463
	46	-8.86113		50024	50613.8	49405.3								7.4768
	46.1125	-8.7038		50031.5	50617	49416.8								4.952
	46.1892	-8.71377		50036.5	50619.1	49424.4								12.0231
	46.3775	-8.72663		50048.5	50624.4	49443.3								2.54951
	46.4192	-8.77243		50051	50625.5	49447.4								4.97139
	46.5	-8.378		50056	50627.8	49455.4								8.90588
	46.6487	-8.43213		50064.9	50631.9	49470.2								4.47408
	46.7263	-8.4632		50069.4	50634	49477.8								1.37587
	46.75	-8.51057		50070.8	50634.7	49480.1								7.18246
	46.8784	-8.55703		50078	50638.2	49492.7								6.59195
	47	-8.62973		50084.5	50641.6	49504.7								1.79284
	47.034	-8.52113		50086.3	50642.6	49508								10.9832
	47.25	-8.2161		50097.3	50648.6	49529.2								0.295853
	47.2556	-8.40693		50097.6	50648.7	49529.8								4.23956
	47.3426	-8.39353		50101.9	50651.1	49538.4								7.43474
	47.5	-8.33453		50109.3	50655.5	49553.8								3.09901
	47.5674	-8.30383		50112.4	50657.3	49560.4								3.87734
	47.6521	-8.31193		50116.3	50659.6	49568.8								6.49724
	47.7971	-8.44597		50122.8	50663.4	49583.2								7.3045
	47.9627	-8.17903		50130.1	50667.8	49599.8								1.61472
	48	-8.36913		50131.7	50668.7	49603.5								1.17615
	48.0268	-8.3745		50132.9	50669.4	49606.2								4.69222
	48.135	-8.61753		50137.6	50672.1	49617.1								4.98943
	48.25	-8.61773		50142.5	50674.9	49628.7								0.260509
	48.2564	-8.54367		50142.8	50675	49629.4								0.825223
	48.2745	-8.22757		50143.6	50675.5	49631.3								9.21938
	48.486	-8.23		50152.8	50680.4	49652.9								0.61707
	48.5	-8.28823		50153.5	50680.7	49654.4								3.90051
	48.5878	-8.27993		50157.4	50682.6	49663.5								5.75534
	48.7156	-8.27517		50163.1	50685.3	49676.9								1.54827
	48.75	-8.2196		50164.7	50686	49680.5								7.08945
	48.9027	-8.22963		50171.8	50689	49696.7								1.98547
	48.9452	-8.21233		50173.7	50689.8	49701.2								2.62832
	49	-8.28757		50176.4	50690.8	49707.1								0.770695
	49.0161	-8.56637		50177.1	50691.1	49708.8								7.80981
	49.1747	-8.61107		50185	50693.8	49726.1								2.21022
	49.2192	-8.30777		50187.2	50694.5	49730.9								1.57011
	49.25	-8.33417		50188.7	50695	49734.3								7.95989
	49.4042	-8.31167		50196.7	50697.4	49751.4								5.09864
	49.5	-8.55017		50201.8	50698.9	49762.1								2.0476
	49.5377	-8.30347		50203.8	50699.5	49766.4								5.24796
	49.6337	-8.3141		50209.1	50701	49777.2								6.48649
	49.75	-8.3413		50215.6	50702.8	49790.4								6.18413
	49.8583	-8.40367		50221.8	50704.5	49802.8								0.289724
	49.8632	-8.45227		50222	50704.6	49803.4								2.15343
	49.8996	-8.48233		50224.2	50705.2	49807.7								5.90415
	50	-8.70443		50230.1	50706.9	49819.2								5.60214
	50.0926	-8.71893		50235.7	50708.5	49830.1								5.40093
	50.181	-8.5131		50241.1	50710.1	49840.4								4.30357
	50.25	-8.43137		50245.4	50711.4	49848.5								4.55575
	50.322	-8.40593		50250	50712.9	49857								11.5519
	50.5	-8.51747		50261.5	50716.7	49878.1								0.396642
	50.5061	-8.36093		50261.9	50716.8	49878.8								2.99003
	50.5514	-8.3588		50264.9	50717.9	49884.2								13.5479
	50.75	-8.42317		50278.5	50723	49908.1								2.15879
	50.7807	-8.69037		50280.6	50723.9	49911.9								0.349423
	50.7862	-8.60387		50281	50724	49912.5								3.37192
	50.8338	-8.4051		50284.3	50725.4	49918.3								11.9069
	51	-8.30213		50296.2	50730.6	49938.4								0.729427
	51.01	-8.43033		50297	50730.9	49939.7								11.3998
	51.1641	-8.3055		50308.4	50736.3	49958.5								5.66067
	51.2393	-8.39893		50314	50739	49967.7								0.835979
	51.25	-8.21977		50314.9	50739.5	49969.1								16.9328
	51.4685	-8.5718		50331.8	50748.1	49996.1								2.20269
	51.4972	-8.20377		50334	50749.3	49999.6								0.236485
	51.5	-8.22593		50334.2	50749.4	50000								14.0301
	51.6763	-8.16363		50348.3	50756.9	50022								1.77443
	51.6977	-8.52437		50350	50757.9	50024.8								4.21131
	51.75	-8.44993		50354.3	50760.2	50031.4								6.77007
	51.8334	-8.26423		50361	50763.9	50041.8								7.73469
	51.9268	-8.3684		50368.8	50768.1	50053.8								6.05277
	52	-8.40483		50374.8	50771.4	50063.1								13.057
	52.1559	-8.72013		50387.9	50778.4	50083.2								1.43217
	52.1727	-8.35073		50389.3	50779.2	50085.4								6.50774
	52.25	-8.39523		50395.8	50782.7	50095.4								11.4851
	52.385	-8.43163		50407.3	50788.8	50113								9.84906
	52.5	-8.5748		50417.1	50793.9	50128.1								1.28854
	52.5154	-8.4209		50418.4	50794.5	50130.1								4.81764
	52.5707	-8.28483		50423.2	50797	50137.5								3.70634
	52.614	-8.47393		50427	50798.8	50143.3								11.7566
	52.75	-8.64263		50438.7	50804.5	50161.5								8.06303
	52.8429	-8.74637		50446.8	50808.3	50174								1.56226
	52.8615	-8.3334		50448.3	50809	50176.5								12.0768
	53	-8.201		50460.4	50814.4	50195.4								6.26316
	53.0718	-8.2293		50466.7	50817.1	50205.3								12.1085
	53.2112	-8.2102		50478.8	50822.1	50224.4								3.40198
	53.25	-8.30827		50482.2	50823.5	50229.8								4.45213
	53.3006	-8.32237		50486.6	50825.3	50236.9								14.7837
	53.4699	-8.6306		50501.4	50831.3	50260.1								2.62971
	53.5	-8.60303		50504.1	50832.3	50264.2								2.54372
	53.5294	-8.5759		50506.6	50833.4	50268.2								3.16008
	53.5647	-8.25113		50509.8	50834.7	50273.1								16.2837
	53.75	-8.34717		50526	50841.5	50298.2								0.705952
	53.7582	-8.3402		50526.7	50841.9	50299.2								14.508
	53.9222	-8.3701		50541.3	50848.4	50320.9								5.77022
	53.9868	-8.4361		50547	50851.2	50329.4								1.15549
	54	-8.34493		50548.2	50851.8	50331								19.1847
	54.2155	-8.62817		50567.4	50861.9	50358.1								3.13716
	54.25	-8.46777		50570.5	50863.7	50362.4								3.05151
	54.2837	-8.17033		50573.6	50865.5	50366.5								8.18718
	54.3745	-8.1416		50581.7	50870.5	50377.3								6.22787
	54.444	-8.16853		50588	50874.5	50385.3								5.06768
	54.5	-8.41677		50593	50877.9	50391.7								13.635
	54.6496	-8.17017		50606.7	50887.8	50408.1								2.09884
	54.6725	-8.1612		50608.8	50889.4	50410.5								7.04289
	54.75	-8.1723		50615.8	50895	50418.4								13.8873
	54.901	-8.42		50629.7	50907	50433.1								9.16186
	55	-8.39583		50638.9	50915.7	50442.1								1.85632
	55.0198	-8.11203		50640.7	50917.5	50443.8								10.1468
	55.1293	-8.11557		50650.9	50927.8	50452.9								11.3178
	55.25	-8.15553		50662.2	50940	50462.3								3.28324
	55.2852	-8.43797		50665.5	50943.7	50464.9								6.86026
	55.3576	-8.33863		50672.3	50951.4	50470.1								3.48306
	55.3946	-8.11393		50675.8	50955.4	50472.6								9.90377
	55.5	-8.04713		50685.7	50967.1	50479.4								8.13024
	55.5858	-8.06443		50693.8	50976.8	50484.5								15.5397
	55.75	-8.2382		50709.4	50995.8	50493.4								2.2771
	55.7742	-8.0738		50711.7	50998.6	50494.6								3.79643
	55.814	-8.02553		50715.5	51003.3	50496.5								17.6663
	56	-8.0411		50733.1	51025.1	50504.6								3.99021
	56.0421	-8.25563		50737.1	51030.1	50506.2								11.1128
	56.1586	-8.1069		50748.2	51043.6	50510.4								4.08214
	56.2024	-8.23197		50752.3	51048.5	50511.8								4.55482
	56.25	-8.20277		50756.9	51054	50513.2								1.89711
	56.2701	-8.57057		50758.8	51056.2	50513.8								21.5843
	56.4981	-8.51907		50780.3	51081.1	50519.3								0.188902
	56.5	-8.49557		50780.5	51081.3	50519.4								4.5309
	56.5481	-8.2267		50785.1	51086.3	50520.3								16.749
	56.7259	-8.25833		50801.8	51103.8	50523.1								2.251
	56.75	-8.22407		50804.1	51106	50523.4								18.0264
	56.9428	-8.18987		50822.1	51122.6	50525								1.023
	56.9537	-8.16453		50823.1	51123.5	50525.1								4.27254
	57	-8.17453		50827.4	51127	50525.3								11.7516
	57.1269	-8.38447		50839.1	51136.1	50525.7								4.9777
	57.1814	-8.32577		50844.1	51139.6	50525.8								6.34454
	57.25	-8.3843		50850.5	51143.9	50525.9								8.52421
	57.3429	-8.1219		50859	51149.2	50526								6.0313
	57.409	-8.149		50865	51152.8	50526.2								8.29232
	57.5	-8.1334		50873.3	51157.3	50526.5								12.4354
	57.6366	-8.3486		50885.7	51163.5	50527.4								10.0355
	57.7485	-8.14387		50895.8	51168	50528.6								10.4524
	57.864	-8.1215		50906.2	51172.3	50530.5								12.2126
	58	-8.0725		50918.4	51176.9	50533.8								5.28521
	58.0592	-8.20847		50923.7	51178.9	50535.6								2.86349
	58.0914	-8.184		50926.6	51179.9	50536.7								6.16742
	58.1598	-8.0146		50932.8	51182.1	50539.4								8.031
	58.25	-8.04297		50940.8	51184.8	50543.5								6.14756
	58.3187	-8.07153		50946.9	51187	50547.2								16.0917
	58.5	-8.1893		50963	51192.6	50559.4								4.08263
	58.5459	-8.20643		50967.1	51194	50563.1								2.74993
	58.5769	-7.99713		50969.9	51195	50565.7								15.3284
	58.75	-7.94487		50985.2	51200.9	50582.8								2.03591
	58.773	-7.8743		50987.2	51201.7	50585.3								20.0763
	59	-7.92089		51007.3	51210.7	50615.3								20.0616
	59.227	-8.00329		51027.4	51221.4	50653								2.03285
	59.25	-7.83979		51029.4	51222.6	50657.2								15.8275
	59.4291	-7.81687		51045.2	51232.4	50691.8								2.21192
	59.4544	-7.85647		51047.4	51233.9	50696.9								4.07111
	59.5	-7.93117		51051.5	51236.7	50706.4								16.2149
	59.6827	-8.1304		51067.7	51248.4	50745.6								5.94598
	59.75	-8.0102		51073.7	51253	50760.5								10.1313
	59.8638	-7.948		51083.8	51261.2	50786.1								4.27187
	59.9124	-7.9417		51088.1	51264.8	50797								3.29557
	59.9492	-8.0816		51091.4	51267.7	50805.5								4.54657
	60	-8.21843		51095.9	51271.7	50817.1								12.865
	60.1441	-8.21343		51108.8	51283.6	50850								9.49903
	60.25	-8.14863		51118.3	51292.8	50873.9								4.75966
	60.3033	-8.00943		51123	51297.7	50885.7								6.74774
	60.3781	-7.93147		51129.8	51304.7	50902.3								11.0095
	60.5	-7.91753		51140.8	51316.5	50928.5								10.4185
	60.6151	-8.12283		51151.2	51328.3	50952.1								12.0118
	60.747	-8.0386		51163.2	51342.5	50977.8								9.87338
	60.8554	-8.10663		51173.1	51354.7	50997.4								4.58573
	60.9046	-8.07183		51177.7	51360.5	51005.9								8.7391
	61	-8.1304		51186.4	51371.9	51021.2								9.22585
	61.0997	-8.1972		51195.6	51384.2	51036								8.68028
	61.1944	-8.07223		51204.3	51396.1	51048.8								14.1941
	61.3483	-8.16577		51218.5	51416.1	51067.3								13.9162
	61.5	-8.0445		51232.4	51436.2	51083								9.25181
	61.6019	-8.2172		51241.7	51449.9	51092.2								3.87335
	61.6447	-8.06083		51245.6	51455.6	51095.8								9.37834
	61.75	-8.12543		51254.9	51469.6	51103.9								9.77076
	61.8609	-8.1811		51264.7	51484.3	51111.4								0.174536
	61.8633	-8.29203		51264.9	51484.6	51111.6								11.8126
	62	-8.17287		51276.7	51502.4	51119.6								8.1755
	62.0973	-7.94203		51284.9	51514.7	51124.6								2.41079
	62.1258	-8.01063		51287.3	51518.4	51126								10.1191
	62.25	-7.9804		51297.4	51533.5	51131.5								11.5598
	62.3971	-8.18063		51309	51550.6	51137.1								11.611
	62.5515	-8.0157		51320.6	51567.5	51142.2								8.74421
	62.6753	-8.1968		51329.3	51579.7	51145.8								5.1107
	62.75	-8.22043		51334.4	51586.7	51147.9								4.73931
	62.8223	-8.30893		51339.2	51593	51149.9								8.65943
	62.9609	-8.2517		51347.8	51603.9	51153.8								2.30942
	63	-8.1794		51350.1	51606.7	51154.9								0.409027
	63.0068	-8.08187		51350.5	51607.2	51155								13.2406
	63.25	-8.04653		51363.8	51621.5	51162.1								0.203452
	63.2545	-8.05823		51364	51621.7	51162.2								10.0651
	63.4625	-8.03163		51374.1	51630.6	51168.5								1.67616
	63.5	-8.08293		51375.7	51631.9	51169.7								2.48324
	63.5564	-8.1374		51378.2	51633.8	51171.4								8.16335
	63.75	-8.2717		51386.4	51639	51177.6								1.16955
	63.779	-8.31507		51387.6	51639.7	51178.6								3.48207
	63.8673	-8.32107		51391	51641.4	51181.5								1.97712
	63.9179	-8.2184		51393	51642.4	51183.2								3.12644
	64	-8.1291		51396.1	51643.7	51185.9								6.99446
	64.1875	-8.17723		51403.1	51646.3	51192.3								2.27604
	64.25	-8.3027		51405.4	51647	51194.5								4.4705
	64.3725	-8.2362		51409.9	51648.4	51198.7								4.72204
	64.5	-8.0588		51414.6	51649.9	51203.3								0.669696
	64.5177	-8.08507		51415.3	51650.1	51203.9								8.06824
	64.7303	-8.29963		51423.3	51653.1	51211.6								0.783383
	64.75	-8.28097		51424.1	51653.4	51212.3								2.98131
	64.8255	-8.1813		51427.1	51654.7	51215.1								1.33558
	64.8583	-8.0616		51428.4	51655.3	51216.3								15.3039
	65.2098	-8.1315		51443.7	51664.3	51229.5								1.85668
	65.25	-8.19193		51445.6	51665.6	51231								1.21853
	65.2763	-8.10783		51446.8	51666.4	51232								10.8519
	65.5	-8.1855		51457.7	51674.7	51240.8								3.66155
	65.5727	-8.2312		51461.3	51677.6	51243.8								5.15536
	65.6735	-8.53973		51466.5	51681.9	51247.9								2.58767
	65.7243	-8.3639		51469.1	51684.2	51250								1.35429
	65.75	-8.4628		51470.4	51685.3	51251.1								10.4879
	65.9476	-8.28767		51480.9	51694.7	51259.6								2.79942
	66	-8.50153		51483.7	51697.3	51261.9								9.20073
	66.1688	-8.32767		51492.9	51705.9	51269.7								4.45502
	66.25	-8.41713		51497.4	51710.2	51273.5								4.69845
	66.3348	-8.32757		51502.1	51714.7	51277.6								9.16573
	66.5	-8.38097		51511.2	51723.7	51285.8								5.9023
	66.6056	-8.47837		51517.1	51729.6	51291.3								0.167053
	66.6092	-8.4312		51517.3	51729.7	51291.5								7.01004
	66.735	-8.56937		51524.3	51736.7	51298.3								0.833203
	66.75	-8.36293		51525.1	51737.6	51299.1								13.8014
	67	-8.45517		51538.9	51751.4	51313.4								2.46174
	67.0449	-8.24557		51541.4	51753.9	51316.1								5.66156
	67.1485	-8.45323		51547.1	51759.6	51322.5								5.46218
	67.25	-8.50027		51552.5	51765.1	51328.8								12.047
	67.4752	-8.4732		51564.6	51777.5	51343.4								1.32868
	67.5	-8.35613		51565.9	51778.8	51345.1								1.27374
	67.5238	-8.4796		51567.2	51780.2	51346.7								2.75382
	67.576	-8.77693		51569.9	51783.1	51350.1								9.15767
	67.75	-8.74057		51579.1	51792.8	51361.9								7.82782
	67.8995	-8.41923		51586.9	51801.5	51372.2								5.18642
	68	-8.24913		51592.1	51807.4	51379.1								0.930943
	68.0179	-8.31867		51593	51808.4	51380.3								11.9317
	68.25	-8.56293		51605	51822.6	51396.3								3.42393
	68.3171	-8.42137		51608.4	51826.8	51400.9								5.50014
	68.4252	-8.43727		51613.9	51833.8	51408.3								2.53877
	68.4747	-8.36657		51616.4	51837.1	51411.7								12.7288
	68.7274	-8.33633		51629.2	51854.5	51428.6								1.15664
	68.75	-8.4207		51630.3	51856.2	51430.1								9.8761
	68.9469	-8.43943		51640.2	51870.9	51442.8								9.12954
	69.1298	-8.4563		51649.3	51885.4	51454.1								5.96453
	69.25	-8.4813		51655.3	51895.3	51461.3								2.82719
	69.307	-8.46493		51658.1	51900.2	51464.7								6.33508
	69.4351	-8.6525		51664.5	51911.2	51472.1								3.20991
	69.5	-8.65927		51667.7	51916.9	51475.8								1.184
	69.5236	-8.46023		51668.8	51919.1	51477.2								11.1186
	69.75	-8.60073		51680	51939.5	51489.7								7.74113
	69.9081	-8.1784		51687.7	51954.2	51498.1								1.56472
	69.9396	-8.43527		51689.3	51957.2	51499.8								11.0221
	70.1662	-8.33267		51700.3	51978.6	51511.6								4.08426
	70.25	-8.54253		51704.4	51986.6	51515.9								1.60274
	70.2828	-8.29833		51706	51989.7	51517.5								8.62813
	70.4611	-8.39827		51714.6	52006.8	51526.4								1.8867
	70.5	-8.41443		51716.5	52010.5	51528.4								7.09979
	70.647	-8.42927		51723.6	52024.6	51535.6								4.96405
	70.75	-8.4151		51728.6	52034.4	51540.7								12.0141
	71	-8.57183		51740.6	52057.9	51552.8								16.3183
	71.3414	-8.65287		51756.9	52089	51569.2								7.58779
	71.5	-8.7259		51764.5	52103.1	51576.8								2.66996
	71.5565	-8.78433		51767.1	52108	51579.5								5.47962
	71.6713	-8.7629		51772.6	52118	51584.9								3.76208
	71.75	-8.7232		51776.4	52124.8	51588.7								2.66591
	71.8062	-8.73447		51779.1	52129.5	51591.3								8.75583
	71.9899	-8.78547		51787.8	52144.9	51600								0.475754
	72	-8.80523		51788.3	52145.8	51600.5								6.13687
	72.1293	-8.75867		51794.4	52156.3	51606.5								5.75652
	72.25	-8.9642		51800.2	52166.1	51612.2								2.2839
	72.2976	-8.73617		51802.5	52169.9	51614.4								9.61545
	72.5	-8.61243		51812.1	52185.7	51623.7								4.04892
	72.5848	-8.55343		51816.1	52192.2	51627.7								0.476484
	72.5947	-8.55627		51816.6	52192.9	51628.1								5.81586
	72.7171	-8.62467		51822.4	52202.1	51633.7								7.82754
	72.8815	-8.4189		51830.2	52214.1	51641.2								5.68797
	73	-8.69637		51835.9	52222.6	51646.6								7.56214
	73.1582	-8.46157		51843.5	52233.7	51653.7								7.66565
	73.3182	-8.7207		51851.2	52244.6	51660.9								0.910611
	73.3365	-8.69487		51852.1	52245.9	51661.8								4.21799
	73.4251	-8.6924		51856.3	52251.8	51665.7								12.3645
	73.6825	-8.45007		51868.7	52269	51677								3.20887
	73.75	-8.39743		51871.9	52273.4	51680								8.66042
	73.9307	-8.55517		51880.5	52285.3	51687.8								6.25767
	74.0621	-8.91797		51886.8	52293.9	51693.4								5.15051
	74.1701	-8.69387		51891.9	52301.1	51698								3.80938
	74.25	-8.7877		51895.7	52306.4	51701.4								7.17462
	74.4008	-8.4672		51902.9	52316.6	51707.7								4.69136
	74.5	-8.73757		51907.6	52323.3	51711.8								2.55429
	74.5544	-8.7647		51910.2	52327.1	51714								3.25872
	74.6232	-8.68633		51913.4	52331.9	51716.8								5.98187
	74.75	-8.67517		51919.4	52340.8	51722								0.564077
	74.7623	-8.61103		51920	52341.7	51722.5								3.52078
	74.8375	-8.64293		51923.5	52347.1	51725.5								7.62216
	75	-8.4286		51931.1	52359.1	51731.9								2.05026
	75.0441	-8.22807		51933.2	52362.4	51733.6								6.64223
	75.1865	-8.47123		51939.8	52373.3	51739.2								2.59246
	75.2432	-8.42007		51942.4	52377.6	51741.4								0.323718
	75.25	-8.6416		51942.7	52378.2	51741.6								8.52835
	75.4351	-8.39333		51951.3	52392.7	51748.7								0.137873
	75.4378	-8.45657		51951.4	52392.9	51748.8								2.84637
	75.5	-8.5316		51954.2	52397.8	51751.1								5.49303
	75.6202	-8.5183		51959.7	52407.3	51755.6								5.92728
	75.75	-8.67373		51965.7	52417.6	51760.4								2.22789
	75.7986	-8.4005		51967.9	52421.5	51762.2								1.22617
	75.8259	-8.67103		51969.1	52423.6	51763.2								6.56768
	75.9708	-8.48013		51975.7	52435	51768.5								1.31007
	76	-8.5196		51977	52437.2	51769.6								4.01348
	76.0893	-8.32973		51981	52444.1	51772.8								2.16018
	76.1369	-8.27063		51983.2	52447.8	51774.6								5.07344
	76.25	-8.31553		51988.2	52456.4	51778.7								2.1053
	76.2973	-8.2406		51990.3	52459.9	51780.4								6.92307
	76.4523	-8.22567		51997.3	52471.3	51785.9								0.846557
	76.4711	-8.3651		51998.1	52472.7	51786.6								1.29125
	76.5	-8.51577		51999.4	52474.7	51787.6								4.53343
	76.6021	-8.5692		52003.9	52481.9	51791.3								5.09615
	76.7174	-8.415		52009	52489.7	51795.4								1.32685
	76.747	-8.27227		52010.4	52491.7	51796.5								0.132626
	76.75	-8.46873		52010.5	52491.9	51796.6								6.04545
	76.8873	-8.29497		52016.5	52500.7	51801.5								4.97028
	77	-8.4634		52021.5	52507.6	51805.5								1.00992
	77.0234	-8.1994		52022.5	52508.9	51806.3								4.25313
	77.1205	-8.4629		52026.8	52514.5	51809.8								1.5323
	77.1555	-8.23163		52028.3	52516.5	51811								5.63756
	77.2838	-8.28283		52033.9	52523.3	51815.6								1.70143
	77.323	-8.18883		52035.6	52525.3	51817								3.74737
	77.4087	-8.2685		52039.4	52529.6	51820.1								3.9589
	77.5	-8.33953		52043.3	52531.8	51823.3								1.34725
	77.5305	-8.215		52044.7	52532.5	51824.4								5.12227
	77.6494	-8.20723		52049.8	52535.1	51826.5								4.37748
	77.75	-8.19613		52054.2	52537.2	51828.3								0.692938
	77.7658	-8.22237		52054.9	52537.5	51828.6								0.303118
	77.7726	-8.42633		52055.2	52537.6	51828.7								4.63032
	77.8799	-8.38383		52059.8	52539.7	51830.6								1.16756
	77.9067	-8.59507		52061	52540.2	51831.1								3.67368
	77.9921	-8.36663		52064.7	52541.8	51832.6								0.345616
	78	-8.42707		52065	52541.9	51832.7								4.40472
	78.1025	-8.2362		52069.4	52543.6	51834.5								4.74689
	78.2115	-8.267		52074.2	52545.4	51836.5								1.63921
	78.25	-8.21807		52075.8	52546	51837.1								2.97583
	78.3194	-8.24523		52078.8	52547	51838.3								4.61359
	78.426	-8.47193		52083.4	52548.5	51840.2								0.0431136
	78.4265	-8.41587		52083.4	52548.5	51840.2								1.81073
	78.4693	-8.4489		52085.2	52549.1	51841								1.33647
	78.5	-8.19073		52086.6	52549.5	51841.5								1.4227
	78.5331	-8.17833		52088	52549.9	51842.1								4.57022
	78.6394	-8.07633		52092.6	52551.2	51843.9								4.61453
	78.7457	-8.166		52097.2	52552.4	51845.8								0.172541
	78.75	-8.27853		52097.4	52552.4	51845.9								4.40092
	78.8524	-8.30807		52101.8	52553.5	51847.6								4.66274
	78.9597	-8.2958		52106.4	52554.5	51849.5								1.72734
	79	-8.28177		52108.1	52554.9	51850.2								0.474883
	79.0114	-8.40757		52108.6	52555	51850.3								2.45869
	79.0678	-8.32747		52111.1	52555.5	51851.3								0.473925
	79.0791	-8.5054		52111.6	52555.6	51851.5								4.20943
	79.1772	-8.3874		52115.8	52556.4	51853.1								3.11446
	79.25	-8.53923		52118.9	52556.9	51854.3								1.61169
	79.2881	-8.27833		52120.5	52557.2	51855								4.74368
	79.4007	-8.29397		52125.2	52558	51856.7								4.08149
	79.5	-8.1885		52129.3	52558.6	51858.2								0.611285
	79.5154	-8.23767		52129.9	52558.7	51858.4								0.77137
	79.5337	-8.40387		52130.7	52558.8	51858.7								3.92263
	79.6324	-8.4101		52134.6	52559.3	51860.1								3.81757
	79.7304	-8.53707		52138.4	52559.7	51861.3								0.764804
	79.75	-8.44103		52139.2	52559.8	51861.6								0.0761996
	79.7521	-8.46517		52139.3	52559.8	51861.6								4.58209
	79.8747	-8.39537		52143.9	52560.3	51863								4.42549
	80	-8.32593		52148.3	52560.6	51864.2								0.0343793
	80.0005	-8.28043		52148.3	52560.6	51864.2								1.22624
	80.037	-8.31873		52149.5	52560.7	51864.5								3.06071
	80.1298	-8.33177		52152.6	52560.9	51865.1								3.7039
	80.25	-8.37533		52156.3	52561.1	51865.8								0.383594
	80.2629	-8.28167		52156.7	52561.1	51865.8								3.23305
	80.3783	-8.3738		52159.9	52561.2	51866.2								0.532083
	80.4001	-8.32853		52160.5	52561.2	51866.2								1.25546
	80.5	-8.3135		52161.7	52561.2	51866.2								0.259652
	80.522	-8.28637		52162	52561.2	51866.2								0.230706
	80.5416	-8.331		52162.2	52561.2	51866.2								1.52386
	80.6878	-8.3548		52163.7	52561.2	51866.2								0.557832
	80.75	-8.2801		52164.3	52561.2	51866.2								0.702291
	80.839	-8.28657		52165	52561.2	51866.2								0.90668
	80.9893	-8.29097		52165.9	52561.2	51866.2								0.0288584
	80.9954	-8.32203		52165.9	52561.2	51866.2								0.0236228
	81	-8.30833		52165.9	52561.2	51866.2								0.0950233
	81.0214	-8.3906		52166	52561.2	51866.2								0.458425
	81.1573	-8.36283		52166.5	52561.2	51866.2								0.167681
	81.25	-8.31		52166.7	52561.2	51866.2								0.0567059
	81.325	-8.19723		52166.7	52561.2	51866.2								0.00423724
	81.4398	-8.23263		52166.7	52561.2	51866.2								0.00217389
	81.4988	-8.19893		52166.7	52561.2	51866.2								3.68456e-05
	81.5	-8.22117		52166.7	52561.2	51866.2								0.0058216
	81.6582	-8.238		52166.7	52561.2	51866.2								0.000773757
	81.679	-8.2686		52166.7	52561.2	51866.2								0.00261603
	81.75	-8.247		52166.7	52561.2	51866.2								0.00427408
	81.8659	-8.2041		52166.7	52561.2	51866.2								0.000294764
	81.874	-8.39513		52166.7	52561.2	51866.2								0.00464254
	82	-8.39847		52166.8	52561.2	51866.2								0.00221073
	82.0597	-8.35337		52166.8	52561.2	51866.2								0.00700065
	82.25	-8.2195		52166.8	52561.2	51866.2								0.000405301
	82.2608	-8.2807		52166.8	52561.2	51866.2								0.000957984
	82.287	-8.34263		52166.8	52561.2	51866.2								0.000221073
	82.2928	-8.5867		52166.8	52561.2	51866.2								0.00648482
	82.4694	-8.58623		52166.8	52561.2	51866.2								0.00114221
	82.5	-8.55353		52166.8	52561.2	51866.2								0.00685327
	82.6859	-8.3705		52166.8	52561.2	51866.2								0.000405301
	82.6967	-8.53697		52166.8	52561.2	51866.2								0.00195281
	82.75	-8.5513		52166.8	52561.2	51866.2								0.00574791
	82.9064	-8.56713		52166.8	52561.2	51866.2								0.000147382
	82.9104	-8.42987		52166.8	52561.2	51866.2								0.00652166
	83.0866	-8.52893		52166.8	52561.2	51866.2								0.00206335
	83.1434	-8.4674		52166.8	52561.2	51866.2								0.00394247
	83.25	-8.48207		52166.8	52561.2	51866.5								0.00497415
	83.3851	-8.39053		52166.8	52561.2	51867.3								0.107154
	83.4632	-8.44333		52166.9	52561.2	51868								0.0968468
	83.515	-8.52137		52167	52561.2	51868.6								0.303029
	83.6358	-8.46787		52167.3	52561.2	51870.1								0.383424
	83.75	-8.31227		52167.7	52561.2	51871.8								0.311854
	83.8271	-8.30657		52168	52561.2	51873.2								0.315167
	83.8957	-8.3044		52168.3	52561.2	51874.5								1.19426
	84.1111	-8.60773		52169.5	52561.2	51878.9								0.349493
	84.1652	-8.43467		52169.9	52561.2	51880.2								0.0938041
	84.179	-8.60437		52170	52561.2	51880.5								0.495812
	84.25	-8.4257		52170.5	52561.2	51882.2								1.53162
	84.4446	-8.3539		52172	52561.2	51887.1								0.476178
	84.5	-8.3356		52172.5	52561.2	51888.5								0.177898
	84.5197	-8.42407		52172.6	52561.2	51889.1								2.87882
	84.6932	-8.70663		52175.5	52561.2	51893.7								0.832499
	84.734	-8.5021		52176.4	52561.2	51894.8								0.330393
	84.75	-8.42887		52176.7	52561.2	51895.3								2.13442
	84.8499	-8.3703		52178.8	52561.2	51898								3.42204
	85	-8.46907		52182.2	52561.3	51902.1								0.81105
	85.034	-8.30583		52183	52561.4	51903.1								3.363
	85.1703	-8.32127		52186.4	52561.9	51906.8								2.05953
	85.25	-8.34097		52188.5	52562	51909.6								0.261322
	85.2599	-8.59977		52188.7	52562	51910.2								2.25361
	85.3446	-8.37287		52191	52562	51914.7								3.74196
	85.4816	-8.50167		52194.7	52562	51921.8								5.19709
	85.6662	-8.27427		52199.9	52562	51931								2.42209
	85.75	-8.4483		52202.3	52562	51935.1								0.98709
	85.7845	-8.42633		52203.3	52562	51936.7								0.757057
	85.8096	-8.63953		52204.1	52562	51938								5.54358
	85.9991	-8.5029		52209.6	52562	51946.6								0.0294486
	86	-8.35043		52209.7	52562	51946.7								2.35686
	86.0797	-8.1683		52212	52562	51950.1								4.9962
	86.25	-8.18063		52217	52562	51957.1								2.65361
	86.3407	-8.35917		52219.7	52562	51960.6								0.087105
	86.3436	-8.31413		52219.8	52562	51960.8								0.695842
	86.3679	-8.3806		52220.5	52562	51961.7								3.78974
	86.5	-8.26537		52224.2	52562	51966.3								4.20726
	86.6499	-8.54413		52228.5	52562	51969.5								1.37319
	86.7	-8.46943		52229.8	52562	51970.3								1.35641
	86.75	-8.54993		52231.2	52562	51971								2.70961
	86.8519	-8.55813		52233.9	52562	51972.3								1.91241
	86.9263	-8.79923		52235.8	52562	51973.2								3.55541
	87.0686	-8.64147		52239.4	52562	51974.6								3.04893
	87.1979	-8.6829		52242.4	52562	51975.7								1.18733
	87.25	-8.64243		52243.6	52562	51976.1								2.02109
	87.3415	-8.86437		52245.6	52562	51976.6								2.32726
	87.4495	-8.59927		52247.9	52562	51977.2								0.312383
	87.4654	-8.62303		52248.3	52562	51977.2								0.721549
	87.5	-8.6316		52249	52562	51977.4								4.47167
	87.7294	-8.9093		52253.4	52562	51977.9								1.44446
	87.808	-8.9947		52254.9	52562	51978								0.624206
	87.8433	-8.79873		52255.5	52562	51978								2.53449
	87.9907	-8.8958		52258.1	52562.2	51978								0.148716
	88	-8.84617		52258.2	52562.3	51978								3.89005
	88.25	-9.12048		52262.1	52563.2	51978								3.44142
	88.5	-9.02281		52265.5	52563.2	51978								0.102991
	88.5079	-9.16074		52265.6	52563.2	51978								1.94624
	88.6664	-9.17183		52267.6	52563.2	51978								0.0471308
	88.6698	-8.9653		52267.6	52563.2	51978								0.920834
	88.75	-8.75467		52268.5	52563.2	51978								0.168074
	88.7646	-8.84707		52268.7	52563.2	51978								2.44966
	89	-8.8785		52271.2	52563.2	51978								0.193364
	89.0201	-9.0115		52271.4	52563.2	51978								0.361825
	89.0579	-8.87123		52271.7	52563.2	51978								0.40136
	89.1014	-8.79267		52272.1	52563.2	51978								1.33797
	89.25	-8.5434		52273.5	52563.2	51978								0.209692
	89.2745	-8.42087		52273.7	52563.2	51978								1.30843
	89.4261	-8.66587		52275	52563.2	51978								0.633319
	89.5	-8.6413		52275.6	52563.2	51978								0.240497
	89.5278	-8.72393		52275.9	52563.2	51978								0.13781
	89.5436	-8.41393		52276	52563.2	51978								1.8227
	89.75	-8.39297		52277.8	52563.2	51978								0.202481
	89.7722	-8.40777		52278	52563.2	51978								0.0741202
	89.7802	-8.68203		52278.1	52563.2	51978								2.11415
	89.9948	-8.61163		52280.2	52563.2	51978								0.0524846
	90	-8.3566		52280.3	52563.2	51978								0.340086
	90.0317	-8.14113		52280.6	52563.2	51978								0.714406
	90.0975	-8.4587		52281.3	52563.2	51978								1.82362
	90.25	-8.51233		52283.1	52563.2	51978								0.409658
	90.2823	-8.65527		52283.5	52563.2	51978								1.64899
	90.4033	-8.66433		52285.2	52563.2	51978								0.74608
	90.4537	-8.56453		52285.9	52563.2	51978								0.700901
	90.5	-8.51223		52286.6	52563.2	51978								0.503889
	90.5321	-8.37237		52287.1	52563.2	51978								2.71688
	90.6911	-8.68507		52289.9	52563.2	51978.2								1.10504
	90.75	-8.69433		52291	52563.2	51978.4								0.603062
	90.7812	-8.7036		52291.6	52563.2	51978.5								2.88315
	90.9189	-8.43243		52294.5	52563.2	51979								0.967991
	90.9621	-8.5714		52295.4	52563.2	51979.2								0.883664
	91	-8.5441		52296.3	52563.2	51979.4								0.715984
	91.0297	-8.654		52297	52563.2	51979.6								4.83801
	91.2176	-8.65347		52301.9	52563.9	51980.9								0.880869
	91.25	-8.5818		52302.7	52564.1	51981.2								0.783756
	91.2775	-8.53587		52303.5	52564.3	51981.4								3.22196
	91.3889	-8.20383		52306.7	52565.3	51982.5								2.12181
	91.4591	-8.39063		52308.9	52566.1	51983.2								1.27339
	91.5	-8.36833		52310.1	52566.6	51983.6								0.787184
	91.5248	-8.6078		52310.9	52566.9	51983.9								5.31988
	91.6877	-8.55877		52316.2	52569.3	51985.9								2.859
	91.7717	-8.66987		52319.1	52570.8	51987								3.14303
	91.8623	-8.52277		52322.2	52572.4	51988.5								1.52875
	91.905	-8.58453		52323.8	52573.3	51989.7								3.43452
	92	-8.61013		52327.2	52575.2	51992.6								0.659074
	92.0181	-8.70677		52327.9	52575.6	51993.2								3.48125
	92.1121	-8.6689		52331.4	52577.6	51996.2								5.21728
	92.25	-8.6667		52336.6	52580.8	52001								0.535492
	92.2642	-8.74987		52337.1	52581.2	52001.4								1.7666
	92.3104	-8.7223		52338.9	52582.3	52003.1								1.08037
	92.3377	-8.53147		52340	52582.9	52004.1								6.31354
	92.5	-8.39703		52346.3	52587	52010.2								0.039253
	92.5013	-8.39897		52346.3	52587	52010.2								0.353406
	92.51	-8.66507		52346.7	52587.2	52010.6								6.94759
	92.6861	-8.84647		52353.6	52591.7	52017.5								2.53723
	92.75	-8.68503		52356.1	52593.4	52020.1								0.237989
	92.7556	-8.70993		52356.4	52593.5	52020.4								2.30085
	92.8137	-8.42213		52358.7	52595	52022.8								2.06218
	92.8661	-8.62177		52360.7	52597.7	52025								5.30143
	93	-8.4216		52366	52604.6	52030.8								0.0394681
	93.001	-8.73873		52366.1	52604.6	52030.8								1.65641
	93.0426	-8.79553		52367.7	52606.8	52032.7								6.83878
	93.2171	-9.08133		52374.6	52615.5	52040.4								1.13657
	93.2464	-9.1287		52375.7	52616.9	52041.8								0.156704
	93.25	-8.96907		52375.9	52617.1	52041.9								1.5271
	93.2889	-8.52297		52377.4	52619.1	52043.7								3.98797
	93.3907	-8.48553		52381.4	52624.1	52048.4								3.94193
	93.4917	-8.6439		52385.3	52628.9	52053.2								2.84591
	93.5649	-8.94613		52388.2	52632.5	52056.6								6.69938
	93.7371	-8.9715		52394.9	52640.6	52064.9								0.155754
	93.741	-8.84327		52395	52640.8	52065								0.350445
	93.75	-8.64923		52395.4	52641.2	52065.5								0.46726
	93.7619	-8.17807		52395.9	52641.8	52066.1								6.15378
	93.9203	-8.17843		52402	52649.2	52073.7								2.45553
	93.9826	-8.40453		52404.5	52652.1	52076.8								4.72146
	94.1041	-8.71377		52409.2	52657.6	52082.8								4.84867
	94.2282	-8.79327		52414	52663.2	52088.9								0.117463
	94.2313	-8.43553		52414.1	52663.4	52089.1								0.744126
	94.25	-8.32677		52414.9	52664.2	52090								1.72457
	94.2938	-8.26737		52416.6	52666.2	52092.2								7.07741
	94.4741	-8.64267		52423.7	52674.2	52101.1								0.670533
	94.4907	-8.70953		52424.4	52675	52101.9								0.355151
	94.5	-8.58787		52424.7	52675.4	52102.4								7.76513
	94.6955	-8.35195		52432.5	52684	52112.1								0.955251
	94.7202	-8.52305		52433.4	52685.1	52113.2								7.64187
	94.9115	-8.68835		52441.1	52693.4	52122.6								2.25508
	94.9667	-9.00027		52443.3	52695.8	52125.3								1.33214
	95	-8.6688		52444.7	52697.2	52126.9								5.59611
	95.138	-8.6715		52450.3	52703.2	52133.5								0.610663
	95.1534	-8.2991		52450.9	52703.8	52134.2								2.48802
	95.2136	-8.65447		52453.4	52706.5	52137.1								1.47178
	95.25	-8.5045		52454.8	52708.1	52138.8								5.21173
	95.377	-8.71763		52460	52713.9	52144.8								3.46318
	95.461	-8.64647		52463.5	52717.9	52148.7								1.61204
	95.5	-8.70643		52465.1	52719.8	52150.5								4.26949
	95.6033	-8.48837		52469.4	52725.1	52155.2								1.12198
	95.6299	-8.42493		52470.5	52726.5	52156.4								3.28918
	95.709	-8.63807		52473.8	52730.9	52159.9								7.90493
	95.8981	-8.8618		52481.7	52742.2	52168.2								2.51925
	95.9575	-8.94285		52484.2	52746.1	52170.8								1.76606
	96	-8.4583		52486	52749	52172.5								1.85234
	96.044	-8.14655		52487.8	52752.1	52174.4								5.86544
	96.1827	-8.3149		52493.7	52762.5	52180.1								1.01471
	96.2068	-8.45		52494.7	52764.4	52181.1								1.81937
	96.25	-8.49707		52496.5	52768	52182.8								8.78019
	96.4567	-8.5335		52505.3	52786.6	52188.4								0.72251
	96.474	-8.34997		52506	52788.3	52188.7								0.46761
	96.4852	-8.5041		52506.5	52789.4	52188.9								0.637778
	96.5	-8.33783		52507.2	52790.9	52189.2								8.85724
	96.7075	-8.65333		52516	52813.6	52192.9								1.79103
	96.75	-8.5062		52517.8	52818.6	52193.7								2.43176
	96.8069	-8.60833		52520.2	52825.7	52194.6								3.62824
	96.8918	-8.29643		52523.9	52836.8	52196.1								2.86116
	96.9591	-8.4699		52526.7	52846	52197.1								1.75131
	97	-8.36783		52528.5	52851.9	52197.8								6.36793
	97.1492	-8.52613		52534.8	52874.5	52200								2.69439
	97.2117	-8.6459		52537.5	52884.7	52201								1.62582
	97.25	-8.70127		52539.2	52890.9	52201.5								1.96879
	97.2962	-8.55917		52541.1	52898.7	52202.1								7.24045
	97.4652	-8.51167		52548.4	52928.6	52204.4								1.50109
	97.5	-8.57413		52549.9	52935	52204.8								0.557699
	97.5133	-8.79843		52550.4	52937.5	52205								7.43011
	97.6856	-8.5213		52557.9	52970.6	52207.1								1.46223
	97.7198	-8.71737		52559.3	52977.3	52207.5								1.29079
	97.75	-8.7435		52560.6	52983.3	52207.8								6.50573
	97.9005	-9.0705		52567.1	53014	52209.5								3.23716
	97.9755	-9.00903		52570.4	53029.6	52210.2								1.03676
	98	-8.88953		52571.4	53034.7	52210.5								2.55056
	98.0586	-8.5939		52573.9	53047.2	52211.1								7.49494
	98.2324	-8.63303		52581.4	53084.5	52212.7								0.781282
	98.25	-8.61553		52582.2	53088.4	52212.9								2.6933
	98.3123	-8.9186		52584.9	53102	52213.4								4.43867
	98.4139	-8.6924		52589.4	53124.5	52214.3								3.35745
	98.4906	-8.88407		52592.7	53141.6	52214.9								0.392818
	98.5	-8.67417		52593.1	53143.6	52215								10.946
	98.75	-8.8405		52604	53199.2	52216.9								11.0181
	99	-8.67053		52615.1	53254.4	52218.5								0.486542
	99.0108	-8.82973		52615.6	53256.8	52218.6								2.43479
	99.066	-8.6814		52618	53268.8	52219								6.56769
	99.2144	-8.8749		52624.6	53300.8	52219.8								1.60071
	99.25	-8.73977		52626.2	53308.4	52220								1.02327
	99.2729	-8.94373		52627.2	53313.3	52220.1								4.00819
	99.3627	-8.70387		52631.2	53332.4	52220.6								6.11224
	99.5	-8.74653		52637.3	53360.9	52221.1								1.60797
	99.5363	-8.7774		52638.9	53368.3	52221.3								4.6934
	99.6414	-8.74407		52643.6	53389.6	52221.6								2.86282
	99.7049	-8.87287		52646.5	53402.4	52221.8								2.01364
	99.75	-8.70873		52648.5	53411.3	52221.9								2.28268
	99.8009	-8.93737		52650.8	53421.4	52222								4.56648
	99.9034	-8.69817		52655.3	53441.1	52222.1								4.343
	100	-8.66123		52659.7	53459.4	52222.2								2.99939
	100.067	-8.62733		52662.7	53471.8	52222.2								3.71454
	100.15	-8.6291		52666.4	53487	52222.2								3.13129
	100.22	-8.77413		52669.5	53499.4	52222.2								5.09548
	100.334	-8.7627		52674.6	53519.2	52222.2								2.18823
	100.383	-8.73853		52676.8	53527.6	52222.2								5.21911
	100.5	-8.45		52682	53546.9	52222.2								4.542
	100.602	-8.37093		52686.6	53563.1	52222.2								0.0444877
	100.603	-8.4228		52686.6	53563.2	52222.2								6.52975
	100.75	-8.51577		52693.1	53585.4	52222.2								0.399092
	100.759	-8.68963		52693.5	53586.8	52222.2								2.30417
	100.811	-8.66597		52695.8	53594.3	52222.2								2.61068
	100.87	-8.70497		52698.4	53602.6	52222.2								6.17785
	101.01	-8.42243		52704.6	53621.4	52222.2								5.7144
	101.14	-8.46647		52710.3	53637.7	52222.2								2.58651
	101.199	-8.32903		52712.9	53644.7	52222.2								2.23234
	101.25	-8.30423		52715.2	53650.6	52222.2								3.10249
	101.321	-8.38673		52718.3	53658.6	52222.2								2.61708
	101.381	-8.35573		52720.9	53665.1	52222.2								1.30693
	101.411	-8.4788		52722.2	53668.3	52222.2								6.34521
	101.557	-8.24313		52728.5	53683	52222.2								5.45612
	101.683	-8.39633		52734	53694.8	52222.2								1.94423
	101.728	-8.21327		52735.9	53698.8	52222.2								0.949682
	101.75	-8.25753		52736.9	53700.7	52222.2								6.2458
	101.895	-8.10513		52743.1	53712.9	52222.2								0.386907
	101.904	-8.2923		52743.5	53713.6	52222.2								2.23374
	101.956	-8.36153		52745.7	53717.7	52222.2								1.88781
	102	-8.37747		52747.6	53721.1	52222.2								2.57094
	102.06	-8.1321		52750.2	53725.6	52222.2								7.00791
	102.224	-7.97733		52757.2	53737.1	52222.2								0.213218
	102.229	-8.08117		52757.4	53737.4	52222.2								0.895235
	102.25	-8.15557		52758.3	53738.8	52222.2								5.91433
	102.389	-8.16613		52764.2	53747.7	52222.2								4.70914
	102.5	-8.1354		52768.9	53754.3	52222.2								0.127107
	102.503	-8.2665		52769.1	53754.5	52222.2								0.211825
	102.508	-8.54333		52769.3	53754.8	52222.2								1.98997
	102.555	-8.4362		52771.3	53757.4	52222.2								7.13804
	102.724	-8.29577		52778.4	53766.5	52222.2								2.27516
	102.778	-8.14707		52780.7	53769.3	52222.2								5.0044
	102.897	-8.1675		52785.7	53775.2	52222.2								6.54134
	103.053	-8.28777		52792.2	53782.4	52222.2								0.962675
	103.076	-8.17463		52793.2	53783.4	52222.2								2.2585
	103.13	-8.4272		52795.5	53785.8	52222.2								5.0107
	103.25	-8.40547		52800.5	53790.9	52222.2								0.45877
	103.261	-8.39023		52800.9	53791.4	52222.2								2.83409
	103.329	-8.31073		52803.8	53794.1	52222.2								5.24294
	103.455	-8.2242		52809	53799.1	52222.4								1.86996
	103.5	-8.3613		52810.9	53800.8	52222.5								4.35844
	103.605	-8.4343		52815.2	53804.6	52222.9								2.239
	103.659	-8.45327		52817.5	53806.6	52223.1								4.63888
	103.771	-8.51917		52822.1	53810.4	52223.7								4.21932
	103.873	-8.25563		52826.3	53813.9	52224.4								0.372064
	103.882	-8.48357		52826.7	53814.1	52224.4								4.87501
	104	-8.3979		52831.6	53817.9	52225.3								4.08591
	104.099	-8.36687		52835.7	53821	52226.1								2.51591
	104.16	-8.34993		52838.2	53822.8	52226.6								7.37655
	104.339	-8.23107		52845.6	53828	52228.1								3.70601
	104.429	-8.54003		52849.3	53830.5	52228.9								0.329348
	104.437	-8.57677		52849.6	53830.8	52229								2.59324
	104.5	-8.6852		52852.2	53832.5	52229.5								3.82709
	104.593	-8.37013		52856	53835	52230.3								5.06034
	104.716	-8.3099		52861.1	53838.3	52231.3								1.39864
	104.75	-8.20067		52862.5	53839.1	52231.6								4.64828
	104.863	-8.2028		52867.1	53842.1	52232.4								5.38916
	104.994	-8.14613		52872.5	53845.4	52233.3								0.246856
	105	-8.12843		52872.8	53845.5	52233.4								6.21341
	105.151	-8.16487		52879	53849.3	52234.2								4.07469
	105.25	-8.02453		52883	53851.8	52234.7								0.905605
	105.272	-8.2546		52883.9	53852.3	52234.8								7.65839
	105.458	-8.28007		52891.6	53856.9	52235.6								1.72983
	105.5	-8.32433		52893.3	53857.9	52235.8								2.10078
	105.551	-8.32433		52895.4	53859.2	52236								8.20025
	105.75	-8.3913		52903.6	53864	52236.8								1.40158
	105.784	-8.24067		52905	53864.8	52236.9								0.247354
	105.79	-8.309		52905.3	53865	52236.9								1.64916
	105.83	-8.51017		52906.9	53866	52237.1								7.01162
	106	-8.61193		52913.9	53870.1	52237.8								4.49813
	106.109	-8.58947		52918.4	53872.7	52238.3								0.949405
	106.132	-8.20993		52919.4	53873.3	52238.4								4.87234
	106.25	-8.1693		52924.3	53876.2	52239.1								5.70147
	106.388	-8.18423		52930	53879.6	52239.9								4.2579
	106.491	-8.48197		52934.2	53882.1	52240.7								0.372154
	106.5	-8.54093		52934.6	53882.3	52240.7								0.0827031
	106.502	-8.2282		52934.7	53882.4	52240.8								6.82597
	106.667	-8.2228		52941.5	53886.5	52242.2								3.43597
	106.75	-8.2731		52944.9	53888.6	52243								6.04793
	106.896	-8.2919		52951	53892.3	52244.6								2.03095
	106.945	-8.2736		52953	53893.6	52245.2								2.28036
	107	-8.31927		52955.3	53895	52245.9								8.50657
	107.205	-8.5072		52963.8	53900.4	52249								0.788999
	107.224	-8.4772		52964.6	53900.9	52249.3								1.07985
	107.25	-8.41003		52965.7	53901.6	52249.7								2.70047
	107.315	-8.18647		52968.4	53903.3	52250.8								7.69287
	107.5	-8.18313		52976.1	53908.4	52254.1								0.124836
	107.503	-8.25993		52976.2	53908.4	52254.2								10.2882
	107.75	-8.44137		52986.5	53915.3	52259.6								0.458654
	107.761	-8.213		52986.9	53915.6	52260.1								0.834024
	107.781	-8.27147		52987.8	53916.2	52260.9								6.17616
	107.929	-8.23767		52993.9	53920.4	52267								2.96569
	108	-8.39703		52996.9	53922.5	52270								2.46587
	108.059	-8.4444		52999.4	53924.2	52272.5								7.32187
	108.234	-8.28433		53006.7	53929.4	52280								0.670028
	108.25	-8.2587		53007.4	53929.9	52280.7								3.64509
	108.337	-8.2855		53011	53932.5	52284.4								6.83772
	108.5	-8.44587		53017.9	53937.5	52291.3								4.78895
	108.614	-8.65377		53022.6	53941	52296								2.10222
	108.664	-8.42027		53024.7	53942.6	52298								3.07125
	108.737	-8.21497		53027.8	53944.9	52301								0.547188
	108.75	-8.03573		53028.4	53945.3	52301.5								5.9399
	108.891	-8.2471		53034.3	53949.9	52306.9								4.59826
	109	-8.40097		53038.9	53953.4	52310.9								7.05578
	109.167	-8.43663		53046	53958.9	52316.6								3.51141
	109.25	-8.12793		53049.5	53961.7	52319.4								0.846568
	109.27	-8.04017		53050.3	53962.4	52320								5.84589
	109.408	-8.0206		53056.2	53967.1	52324.3								1.48389
	109.443	-8.22327		53057.6	53968.3	52325.4								2.41767
	109.5	-8.28503		53060.1	53970.2	52327.1								9.30045
	109.719	-8.32203		53069.4	53977.8	52333.5								1.31791
	109.75	-8.23643		53070.7	53978.9	52334.4								3.57279
	109.834	-8.22877		53074.3	53981.9	52336.7								6.76919
	109.993	-8.20597		53081	53987.5	52341.1								0.2982
	110	-8.25583		53081.3	53987.7	52341.3								6.77737
	110.159	-8.46943		53088.1	53993.4	52345.7								3.88214
	110.25	-8.48307		53092	53996.6	52348.3								0.725486
	110.267	-8.53613		53092.7	53997.2	52348.7								7.04536
	110.432	-8.21267		53099.8	54003.1	52353.4								2.90549
	110.5	-8.17997		53102.7	54005.5	52355.4								1.75235
	110.541	-8.17593		53104.4	54007	52356.6								8.9383
	110.75	-8.37857		53113.3	54014.4	52362.9								2.69601
	110.813	-8.45207		53116	54016.7	52364.9								4.45208
	110.917	-8.57393		53120.5	54020.4	52368.3								3.55439
	111	-8.54857		53124.1	54023.3	52371.1								2.74157
	111.064	-8.28483		53126.8	54025.6	52373.3								0.899752
	111.085	-8.20963		53127.7	54026.4	52374.1								7.07294
	111.25	-8.2135		53134.8	54032.2	52380.1								4.54755
	111.356	-8.52773		53139.3	54036	52384.1								6.18335
	111.5	-8.47537		53145.5	54041.3	52389.8								5.41641
	111.626	-8.60743		53150.9	54045.9	52394.9								2.32321
	111.68	-8.66863		53153.2	54047.9	52397.1								2.23831
	111.732	-8.41147		53155.5	54049.9	52399.3								0.775071
	111.75	-8.40547		53156.3	54050.6	52400.1								6.24901
	111.895	-8.3194		53162.5	54056.2	52406.3								4.53153
	112	-8.5329		53167	54060.4	52411								7.04634
	112.163	-8.5669		53174.1	54067	52418.3								3.7672
	112.25	-8.40123		53177.8	54070.7	52422.3								7.7658
	112.429	-8.51617		53185.6	54078.6	52430.6								0.304119
	112.436	-8.18657		53185.9	54078.9	52430.9								0.521424
	112.448	-8.4032		53186.4	54079.5	52431.5								2.26065
	112.5	-8.225		53188.7	54081.9	52433.9								8.49475
	112.695	-8.59667		53197.2	54091.2	52443.2								2.40114
	112.75	-8.3819		53199.6	54093.9	52445.9								9.19047
	112.96	-8.62603		53208.8	54104.9	52456								1.75476
	113	-8.30647		53210.5	54107.1	52458								7.86894
	113.179	-8.16643		53218.4	54117.2	52466.7								1.71794
	113.218	-8.05227		53220.1	54119.5	52468.6								0.220337
	113.223	-8.36637		53220.3	54119.8	52468.9								1.19016
	113.25	-8.37733		53221.5	54121.3	52470.2								10.3829
	113.485	-8.41947		53231.9	54135.7	52481.9								0.664164
	113.5	-8.1422		53232.6	54136.6	52482.7								10.9157
	113.746	-8.39933		53243.5	54152.5	52495.1								0.177847
	113.75	-8.17717		53243.7	54152.8	52495.3								9.44144
	113.962	-8.11117		53253.1	54167.1	52506.3								1.29384
	113.991	-8.09293		53254.4	54169.1	52507.8								0.401646
	114	-8.06357		53254.8	54169.7	52508.3								0.223159
	114.005	-8.29813		53255	54170	52508.6								10.954
	114.25	-8.14153		53266	54187.1	52521.7								0.582255
	114.263	-8.33413		53266.6	54188	52522.4								10.632
	114.5	-8.21117		53277.2	54205	52535.4								0.898653
	114.52	-8.37887		53278.1	54206.4	52536.6								10.3496
	114.75	-8.28057		53288.5	54223.1	52549.7								0.675909
	114.765	-8.42863		53289.1	54224.2	52550.6								0.450667
	114.775	-8.40753		53289.6	54224.9	52551.2								0.450716
	114.785	-8.32167		53290	54225.7	52551.7								9.70182
	115	-8.25447		53299.7	54241.4	52564.5								1.26503
	115.028	-8.31783		53301	54243.4	52566.2								10.0408
	115.25	-8.49793		53311	54259.6	52579.9								1.35822
	115.28	-8.5726		53312.4	54261.8	52581.8								9.96843
	115.5	-8.4895		53322.4	54277.8	52595.7								1.3603
	115.53	-8.52543		53323.7	54279.9	52597.6								0.362781
	115.538	-8.608		53324.1	54280.5	52598.2								5.12567
	115.651	-8.5112		53329.2	54288.7	52605.4								4.49247
	115.75	-8.321		53333.7	54295.8	52611.8								1.27085
	115.778	-8.2261		53335	54297.8	52613.7								10.0787
	116	-8.19477		53345.1	54313.5	52628.1								1.13518
	116.025	-8.39077		53346.2	54315.3	52629.8								10.2165
	116.25	-8.24587		53356.4	54331	52644.4								0.908042
	116.27	-8.42803		53357.3	54332.4	52645.8								1.7706
	116.309	-8.44467		53359.1	54335.1	52648.3								8.66899
	116.5	-8.48407		53367.8	54348.1	52660.7								0.589849
	116.513	-8.53183		53368.3	54348.9	52661.5								2.13228
	116.56	-8.3444		53370.5	54352.1	52664.5								8.6152
	116.75	-8.3825		53379.1	54364.7	52676.7								0.13596
	116.753	-8.36397		53379.2	54364.9	52676.9								10.8682
	116.993	-8.4669		53390.1	54380.4	52691.9								0.316704
	117	-8.4157		53390.4	54380.8	52692.3								3.57299
	117.079	-8.40063		53394	54385.8	52697.1								6.82257
	117.23	-8.4143		53400.8	54395.1	52706.3								0.902935
	117.25	-8.3992		53401.7	54396.3	52707.5								9.64989
	117.464	-8.34887		53411.4	54409.1	52720.1								1.62115
	117.5	-8.17457		53413	54411.2	52722.2								0.585249
	117.513	-8.10327		53413.6	54412	52723								8.2737
	117.697	-8.20303		53421.8	54422.5	52733.5								2.37961
	117.75	-8.25437		53424.2	54425.4	52736.5								4.21627
	117.844	-8.44723		53428.4	54430.6	52741.8								3.76303
	117.928	-8.43763		53432.2	54435.1	52746.5								3.22177
	118	-8.42547		53435.4	54439	52750.5								6.96825
	118.156	-8.40507		53442.4	54447	52759								4.19031
	118.25	-8.12393		53446.6	54451.7	52764.1								5.87287
	118.382	-8.29347		53452.5	54458.2	52771.1								5.23816
	118.5	-8.07683		53457.7	54463.7	52777.3								0.57638
	118.513	-8.0769		53458.3	54464.3	52778								4.03062
	118.604	-8.11497		53462.3	54468.5	52782.8								0.0885046
	118.606	-8.38083		53462.4	54468.6	52782.9								6.36298
	118.75	-8.3989		53468.7	54474.9	52790.3								3.4387
	118.828	-8.3634		53472.2	54478.2	52794.3								7.56223
	119	-8.1263		53479.7	54485.2	52803								2.06144
	119.047	-8.3517		53481.8	54487.1	52805.3								8.88008
	119.25	-8.17233		53490.7	54494.7	52815.4								0.567411
	119.263	-8.4536		53491.3	54495.2	52816.1								4.18559
	119.359	-8.6819		53495.4	54498.6	52820.8								5.13418
	119.477	-8.8365		53500.6	54502.7	52826.6								0.99941
	119.5	-8.59827		53501.6	54503.5	52827.8								2.64858
	119.561	-8.1807		53504.2	54505.6	52830.8								5.5484
	119.689	-8.1375		53509.8	54509.8	52837								2.63989
	119.75	-8.15007		53512.4	54511.8	52840								6.39413
	119.898	-8.2554		53518.8	54516.5	52847.3								4.39826
	120	-8.16657		53523.2	54519.7	52852.4								4.47777
	120.104	-8.2796		53527.7	54522.9	52857.6								0.0860469
	120.106	-8.5146		53527.8	54523	52857.7								6.18931
	120.25	-8.49433		53534	54527.4	52864.9								2.48967
	120.308	-8.57813		53536.5	54529.2	52867.9								8.22943
	120.5	-8.2438		53544.7	54535.1	52877.7								0.342508
	120.508	-8.33667		53545	54535.4	52878.1								6.37404
	120.657	-8.21027		53551.4	54540	52886								2.09412
	120.706	-8.3435		53553.5	54541.6	52888.6								1.87964
	120.75	-8.2521		53555.4	54543	52890.9								4.05585
	120.845	-8.5308		53559.4	54546	52896								2.38934
	120.901	-8.53333		53561.8	54547.8	52899.1								4.22154
	121	-8.55897		53566	54551.1	52904.5								3.96306
	121.093	-8.3781		53570	54554.2	52909.7								6.68529
	121.25	-8.33847		53576.7	54559.6	52918.7								1.40448
	121.283	-8.45667		53578.1	54560.7	52920.6								7.91239
	121.469	-8.33577		53586	54567.3	52931.4								1.3182
	121.5	-8.31003		53587.3	54568.4	52933.3								3.14619
	121.574	-8.49913		53590.5	54571.1	52937.6								3.31562
	121.652	-8.521		53593.8	54573.9	52942.3								4.1651
	121.75	-8.51397		53597.9	54577.5	52948.1								2.25234
	121.803	-8.26103		53600.2	54579.5	52951.3								1.23237
	121.832	-8.36797		53601.4	54580.6	52953								7.13912
	122	-8.3457		53608.6	54586.8	52963.2								0.382465
	122.009	-8.41053		53609	54587.2	52963.7								7.35266
	122.182	-8.39517		53616.3	54593.7	52974.2								2.89072
	122.25	-8.41997		53619.2	54596.3	52978.4								1.82822
	122.293	-8.6385		53621	54597.9	52981								2.50888
	122.352	-8.65567		53623.5	54600.1	52984.6								6.29587
	122.5	-8.64733		53629.8	54605.8	52993.5								0.808542
	122.519	-8.4336		53630.6	54606.5	52994.7								6.98226
	122.683	-8.45873		53637.6	54612.7	53004.5								2.8544
	122.75	-8.51		53640.5	54615.2	53008.6								3.96416
	122.843	-8.5597		53644.4	54618.8	53014.1								6.69833
	123	-8.57955		53651.1	54624.7	53023.4								6.53482
	123.153	-8.63038		53657.7	54630.3	53032.3								4.14578
	123.25	-8.48162		53661.8	54633.9	53037.9								2.26591
	123.303	-8.40617		53664.1	54635.9	53040.9								6.24367
	123.449	-8.41357		53670.3	54641.2	53049.2								2.18137
	123.5	-8.47497		53672.5	54643	53052.1								3.9779
	123.593	-8.567		53676.5	54646.3	53057.3								4.3198
	123.694	-8.68273		53680.8	54649.9	53063								1.62508
	123.732	-8.7773		53682.4	54651.2	53065.1								0.769724
	123.75	-8.6666		53683.2	54651.8	53066.1								5.08763
	123.869	-8.59997		53688.3	54656	53072.6								5.59764
	124	-8.4013		53693.9	54660.4	53079.8								0.0854293
	124.002	-8.4211		53694	54660.5	53079.9								5.59317
	124.133	-8.38263		53699.6	54664.8	53087								4.90539
	124.248	-8.42113		53704.5	54668.6	53093.1								0.0852673
	124.25	-8.33917		53704.6	54668.6	53093.2								0.426312
	124.26	-8.32653		53705	54669	53093.8								4.94214
	124.376	-8.58983		53709.9	54672.7	53100								0.340615
	124.384	-8.67663		53710.3	54672.9	53100.4								4.93537
	124.5	-8.55847		53715.2	54676.5	53106.5								0.255089
	124.506	-8.27673		53715.5	54676.7	53106.8								5.01263
	124.624	-8.23393		53720.5	54680.3	53113								4.91943
	124.74	-8.32733		53725.4	54683.7	53119								0.423677
	124.75	-8.29347		53725.8	54683.9	53119.6								4.35983
	124.853	-8.34417		53730.2	54686.9	53124.9								4.64749
	124.963	-8.33563		53734.8	54689.9	53130.5								1.56114
	125	-8.2848		53736.4	54690.9	53132.4								1.89726
	125.045	-8.4252		53738.3	54692.1	53134.7								1.09549
	125.071	-8.46673		53739.4	54692.8	53136.1								4.41893
	125.176	-8.67197		53743.8	54695.5	53141.4								3.10943
	125.25	-8.3372		53746.9	54697.4	53145.1								1.21749
	125.279	-8.33887		53748.1	54698.1	53146.6								4.19371
	125.379	-8.32657		53752.3	54700.6	53151.7								4.10319
	125.477	-8.4752		53756.4	54702.9	53156.6								0.962064
	125.5	-8.34177		53757.4	54703.5	53157.8								1.58874
	125.538	-8.24813		53759	54704.3	53159.1								1.42071
	125.572	-8.28087		53760.4	54705.1	53159.9								3.92402
	125.666	-8.4131		53764.3	54707.3	53162.3								1.45966
	125.701	-8.6818		53765.8	54708	53163.2								2.04228
	125.75	-8.588		53767.8	54709.1	53164.4								0.291636
	125.757	-8.59985		53768.1	54709.3	53164.6								3.66381
	125.845	-8.45815		53771.8	54711.2	53166.8								3.61778
	125.932	-8.7083		53775.4	54713	53169								2.82475
	126	-8.61047		53778.2	54714.4	53170.7								0.705794
	126.017	-8.55447		53778.9	54714.8	53171.1								3.44373
	126.1	-8.51867		53782.4	54716.5	53173.2								3.3573
	126.181	-8.5615		53785.7	54718.1	53175.2								2.85734
	126.25	-8.4834		53788.6	54719.4	53177								0.413914
	126.26	-8.4155		53789	54719.6	53177.2								3.18554
	126.337	-8.39177		53792.2	54721.1	53179.2								0.289457
	126.344	-8.56783		53792.5	54721.2	53179.3								2.85202
	126.413	-8.57387		53795.3	54722.5	53181.1								3.05633
	126.487	-8.51983		53798.4	54723.9	53183								0.536678
	126.5	-8.29873		53798.9	54724.2	53183.3								2.4348
	126.559	-8.23517		53801.3	54725.3	53184.8								2.92811
	126.63	-8.26887		53804.3	54726.6	53186.6								2.84372
	126.699	-8.41977		53807.1	54727.8	53188.4								2.10072
	126.75	-8.36163		53809.2	54728.7	53189.7								0.700024
	126.767	-8.46617		53809.9	54729	53190.2								2.75791
	126.834	-8.46907		53812.7	54730.2	53191.9								1.06981
	126.86	-8.51087		53813.7	54730.7	53192.6								1.60428
	126.899	-8.45697		53815.3	54731.3	53193.6								2.63157
	126.963	-8.41173		53818	54732.5	53195.3								0.534376
	126.976	-8.64667		53818.5	54732.7	53195.6								0.986402
	127	-8.4837		53819.5	54733.1	53196.3								1.0684
	127.026	-8.47043		53820.6	54733.5	53196.9								2.50584
	127.087	-8.33973		53823.1	54734.6	53198.5								2.50477
	127.148	-8.4944		53825.6	54735.6	53200.2								2.46272
	127.208	-8.43267		53828	54736.7	53201.8								1.72335
	127.25	-8.3031		53829.8	54737.4	53202.9								0.6564
	127.266	-8.14733		53830.4	54737.6	53203.3								2.37894
	127.324	-8.07907		53832.8	54738.6	53204.9								2.33718
	127.381	-8.09333		53835.1	54739.6	53206.4								2.2955
	127.437	-8.10617		53837.4	54740.5	53207.9								2.29487
	127.493	-8.13393		53839.7	54741.5	53209.4								0.286818
	127.5	-8.0944		53840	54741.6	53209.6								1.92555
	127.547	-8.15797		53841.9	54742.4	53210.9								1.96612
	127.595	-8.3729		53843.9	54743.2	53212.2								0.286695
	127.602	-8.4509		53844.2	54743.3	53212.3								2.17045
	127.655	-8.48253		53846.4	54744.2	53213.8								2.21098
	127.709	-8.3715		53848.6	54745.2	53215.2								1.67845
	127.75	-8.25833		53850.3	54745.9	53216.4								0.450281
	127.761	-8.25723		53850.7	54746.1	53216.7								2.16934
	127.814	-8.2383		53852.9	54747	53218.1								2.12812
	127.866	-8.4012		53855	54747.9	53219.5								2.12788
	127.918	-8.4579		53857.1	54748.8	53220.9								2.12766
	127.97	-8.4621		53859.3	54749.7	53222.3								1.22742
	128	-8.31483		53860.5	54750.2	53223.2								0.85916
	128.021	-8.27243		53861.3	54750.6	53223.7								2.12735
	128.073	-8.22473		53863.5	54751.5	53225.1								2.12724
	128.125	-8.3776		53865.6	54752.5	53226.6								2.08626
	128.176	-8.31143		53867.7	54753.4	53227.9								1.06357
	128.202	-8.3677		53868.7	54753.9	53228.7								1.06356
	128.228	-8.36657		53869.8	54754.4	53229.4								0.899938
	128.25	-8.23113		53870.7	54754.8	53230								1.22719
	128.28	-8.2213		53871.9	54755.3	53230.8								2.16807
	128.333	-8.25497		53874.1	54756.3	53232.2								2.12723
	128.385	-8.5099		53876.2	54757.3	53233.6								2.16825
	128.438	-8.5607		53878.4	54758.3	53235.1								2.20931
	128.492	-8.55727		53880.6	54759.4	53236.5								0.327321
	128.5	-8.37337		53880.9	54759.5	53236.7								1.88218
	128.546	-8.26627		53882.8	54760.4	53238								2.20973
	128.6	-8.2113		53885	54761.5	53239.4								2.25093
	128.655	-8.39		53887.3	54762.6	53240.9								2.29219
	128.711	-8.47727		53889.6	54763.8	53242.4								1.59657
	128.75	-8.3655		53891.2	54764.6	53243.4								0.696
	128.767	-8.35487		53891.9	54765	53243.9								1.22833
	128.797	-8.37787		53893.1	54765.6	53244.7								1.10561
	128.824	-8.57397		53894.2	54766.2	53245.4								2.37538
	128.882	-8.55987		53896.6	54767.4	53247								2.4169
	128.941	-8.54413		53899	54768.7	53248.5								2.4175
	129	-8.3073		53901.4	54770	53250.1								0.0409795
	129.001	-8.28597		53901.5	54770.1	53250.1								2.50003
	129.062	-8.2036		53904	54771.4	53251.7								2.54151
	129.124	-8.3732		53906.5	54772.9	53253.3								2.62393
	129.188	-8.3918		53909.1	54774.4	53255								2.62427
	129.252	-8.44877		53911.7	54775.9	53256.6								2.70653
	129.318	-8.49353		53914.4	54777.6	53258.3								2.50163
	129.379	-8.51707		53916.9	54779.1	53259.9								0.246065
	129.385	-8.51637		53917.2	54779.2	53260.1								2.78874
	129.453	-8.51513		53920	54780.9	53261.8								1.92747
	129.5	-8.24883		53921.9	54782.2	53263								0.943203
	129.523	-8.1968		53922.9	54782.8	53263.6								1.31224
	129.555	-8.0317		53924.2	54783.6	53264.4								1.59921
	129.594	-8.26207		53925.8	54784.6	53265.3								2.99309
	129.667	-8.37353		53928.8	54786.6	53267.2								3.07454
	129.742	-8.5979		53931.8	54788.6	53269								0.327911
	129.75	-8.34317		53932.2	54788.8	53269.2								2.78688
	129.818	-8.3295		53934.9	54790.7	53270.9								3.19581
	129.896	-8.3284		53938.1	54792.9	53272.8								2.21183
	129.95	-8.64977		53940.4	54794.5	53274.1								1.06474
	129.976	-8.60187		53941.4	54795.2	53274.7								0.982706
	130	-8.27093		53942.4	54795.9	53275.3								2.33339
	130.057	-8.1401		53944.7	54797.6	53276.7								3.43719
	130.141	-8.1376		53948.2	54800.1	53278.7								3.47608
	130.226	-8.38893		53951.6	54802.7	53280.7								0.981081
	130.25	-8.25157		53952.6	54803.4	53281.2								2.61529
	130.314	-8.1628		53955.2	54805.4	53282.7								3.67532
	130.404	-8.0479		53958.9	54808.3	53284.8								3.71301
	130.495	-8.10993		53962.6	54811.2	53286.9								0.203914
	130.5	-7.99997		53962.8	54811.3	53287								0.407796
	130.51	-8.2233		53963.2	54811.7	53287.2								3.26082
	130.59	-8.24573		53966.5	54814.3	53289								3.90913
	130.686	-8.32127		53970.4	54817.5	53291.1								2.6036
	130.75	-8.01707		53973	54819.6	53292.5								1.42296
	130.785	-8.0064		53974.4	54820.8	53293.2								4.10256
	130.886	-8.00767		53978.5	54824.3	53295.4								0.852295
	130.907	-8.09313		53979.4	54825.1	53295.8								3.32555
	130.989	-8.1487		53982.7	54827.9	53297.6								0.445809
	131	-8.05423		53983.2	54828.3	53297.8								2.30894
	131.057	-8.22307		53985.5	54830.4	53299								1.53821
	131.095	-8.22037		53987	54831.7	53299.7								4.40738
	131.204	-8.43373		53991.4	54835.7	53301.9								1.85781
	131.25	-8.12093		53993.3	54837.4	53302.8								2.62292
	131.315	-8.16477		53995.9	54839.7	53304.1								4.59376
	131.429	-8.15493		54000.5	54844	53306.2								2.85683
	131.5	-8.20783		54003.4	54846.6	53307.5								1.84916
	131.546	-8.20203		54005.2	54848.3	53308.3								1.92808
	131.594	-8.3091		54007.1	54850.1	53309.1								2.84917
	131.665	-8.47843		54010	54852.7	53310.3								3.40656
	131.75	-8.35507		54013.4	54855.8	53311.7								1.52136
	131.788	-8.2817		54014.9	54857.2	53312.3								4.99751
	131.913	-8.32377		54019.9	54861.8	53314.1								3.47189
	132	-8.32387		54023.4	54865	53315.3								1.67419
	132.042	-8.33657		54025.1	54866.5	53315.8								3.02631
	132.118	-8.34517		54028.1	54869.2	53316.7								2.18752
	132.173	-8.56143		54030.3	54871.1	53317.4								2.97946
	132.248	-8.4493		54033.2	54873.8	53318.2								0.0793962
	132.25	-8.3264		54033.3	54873.8	53318.2								2.30122
	132.308	-8.27747		54035.6	54875.8	53318.8								5.42577
	132.445	-8.26923		54041.1	54880.4	53319.9								2.17428
	132.5	-8.2689		54043.2	54882.2	53320.3								3.39519
	132.586	-8.28453		54046.6	54885	53320.8								1.81371
	132.632	-8.42097		54048.4	54886.4	53321.1								3.89788
	132.731	-8.62373		54052.3	54889.5	53321.5								0.747205
	132.75	-8.49463		54053.1	54890	53321.5								5.02639
	132.878	-8.4907		54058.1	54893.8	53321.8								4.77863
	133	-8.2915		54062.9	54897.1	53321.8								1.13414
	133.029	-8.39757		54064	54897.9	53321.8								4.10071
	133.134	-8.38307		54068.1	54900.5	53321.8								1.94959
	133.184	-8.39063		54070.1	54901.7	53321.8								2.57036
	133.25	-8.20833		54072.6	54903.3	53321.8								3.57704
	133.342	-8.04677		54076.2	54905.4	53321.8								6.12714
	133.5	-8.01583		54082.3	54908.7	53321.8								0.154854
	133.504	-8.04583		54082.5	54908.8	53321.8								2.47589
	133.568	-8.02437		54085	54909.7	53321.8								2.20228
	133.625	-8.19153		54087.2	54910.3	53321.8								1.69819
	133.669	-8.22177		54088.9	54910.7	53321.8								3.12207
	133.75	-8.25243		54092	54911.5	53321.8								3.38579
	133.838	-8.0751		54095.4	54912.2	53321.8								6.2163
	134	-8.09903		54101.6	54913.5	53321.8								0.421311
	134.011	-8.11377		54102	54913.6	53321.8								3.59623
	134.105	-8.24817		54105.6	54914.3	53321.8								3.13118
	134.187	-8.18323		54108.7	54914.9	53321.8								2.40188
	134.25	-8.19087		54111.2	54915.4	53321.8								4.48992
	134.368	-8.0426		54115.6	54916.2	53321.8								5.00891
	134.5	-8.06887		54120.6	54917	53321.8								1.96923
	134.552	-8.0974		54122.6	54917.3	53321.8								0.870285
	134.575	-8.29817		54123.5	54917.4	53321.8								6.26808
	134.741	-8.3801		54129.8	54918.4	53321.8								0.339177
	134.75	-8.2886		54130.1	54918.5	53321.8								3.98964
	134.856	-8.0443		54134.1	54919	53321.8								2.89222
	134.933	-8.0403		54137	54919.5	53321.8								2.51254
	135	-7.98403		54139.5	54919.8	53321.8								1.23611
	135.033	-8.2521		54140.7	54920	53321.8								3.62789
	135.13	-8.2693		54144.4	54920.5	53321.8								4.47638
	135.25	-8.23407		54148.8	54921	53321.8								3.01397
	135.331	-8.11063		54151.8	54921.4	53321.8								5.56467
	135.481	-8.28507		54157.4	54922.1	53321.8								0.703265
	135.5	-8.31937		54158.1	54922.1	53321.8								1.3315
	135.536	-8.32317		54159.4	54922.3	53321.8								7.74019
	135.746	-8.1816		54167.2	54923	53321.8								0.146976
	135.75	-8.15623		54167.3	54923	53321.8								6.15703
	135.918	-8.35917		54173.5	54923.4	53321.8								1.49778
	135.959	-8.36467		54175	54923.5	53321.8								1.49584
	136	-8.39607		54176.5	54923.6	53321.8								3.67649
	136.101	-8.05137		54180.2	54923.8	53321.8								2.79469
	136.178	-7.9746		54183	54923.8	53321.8								2.60668
	136.25	-8.02187		54185.6	54923.9	53321.8								3.42951
	136.345	-8.38847		54189	54923.9	53321.8								1.98029
	136.4	-8.3416		54191	54923.9	53321.8								3.59051
	136.5	-8.3505		54194.6	54923.9	53321.8								4.57659
	136.628	-8.0758		54199.1	54923.9	53321.8								4.34139
	136.75	-8.02963		54203.5	54923.9	53321.8								0.42591
	136.762	-8.3774		54203.9	54923.9	53321.8								3.47069
	136.86	-8.38217		54207.4	54923.9	53321.8								4.93432
	137	-8.31963		54212.3	54923.9	53321.8								3.36763
	137.096	-8.0746		54215.7	54923.9	53321.8								2.51777
	137.168	-8.3204		54218.2	54923.9	53321.8								2.85965
	137.25	-8.37327		54221.1	54923.9	53321.8								1.46164
	137.292	-8.28847		54222.5	54923.9	53321.8								1.59857
	137.338	-8.09467		54224.1	54923.9	53321.8								5.61211
	137.5	-7.9776		54229.7	54923.9	53321.8								2.21018
	137.564	-8.3292		54231.9	54923.9	53321.8								0.689939
	137.584	-8.3265		54232.6	54923.9	53321.8								5.71404
	137.75	-8.3203		54238.3	54923.9	53321.8								2.91815
	137.835	-8.07563		54241.3	54923.9	53321.8								3.97533
	137.951	-8.32413		54245.2	54923.9	53321.8								4.78881
	138.091	-8.56917		54250	54923.9	53321.8								5.42984
	138.25	-8.56207		54255.5	54923.9	53321.8								2.62722
	138.327	-8.51437		54258.1	54923.9	53321.8								0.852769
	138.352	-8.5505		54258.9	54923.9	53321.8								2.31914
	138.42	-8.43713		54261.3	54923.9	53321.8								2.728
	138.5	-8.1981		54264	54923.9	53321.8								3.98986
	138.617	-8.1802		54268	54923.9	53322.1								2.59242
	138.693	-8.56283		54270.6	54923.9	53322.5								1.94499
	138.75	-8.52857		54272.5	54923.9	53322.8								4.71242
	138.888	-8.5111		54277.2	54923.9	53323.9								3.82954
	139	-8.2387		54281	54923.9	53325.1								1.71136
	139.05	-8.47743		54282.8	54923.9	53325.7								3.94062
	139.165	-8.53393		54286.7	54924	53327.2								2.91698
	139.25	-8.5322		54289.6	54924.1	53328.4								5.0543
	139.397	-8.42273		54294.7	54924.6	53330.8								1.68769
	139.446	-8.3654		54296.4	54924.8	53331.7								0.930609
	139.473	-8.26373		54297.3	54924.9	53332.2								0.931089
	139.5	-8.12097		54298.2	54925	53332.7								8.02156
	139.732	-8.12113		54306.2	54926.3	53337.5								0.103989
	139.735	-8.3343		54306.3	54926.3	53337.5								9.21473
	140	-8.31477		54315.6	54928.1	53343.7								0.837535
	140.024	-8.2551		54316.4	54928.2	53344.3								1.39706
	140.064	-8.26013		54317.8	54928.5	53345.3								6.51635
	140.25	-8.31773		54324.3	54929.9	53350.1								2.53172
	140.322	-8.35537		54326.8	54930.5	53352.1								2.14918
	140.383	-8.36253		54329	54931	53353.7								2.04719
	140.441	-8.2579		54331	54931.4	53355.3								2.0863
	140.5	-8.2946		54333.1	54931.8	53357								4.39769
	140.624	-8.1984		54337.5	54932.8	53360.5								2.45495
	140.693	-8.45607		54340	54933.3	53362.5								2.03237
	140.75	-8.4184		54342	54933.7	53364.2								6.55275
	140.933	-8.40017		54348.6	54934.8	53369.6								2.19396
	140.994	-8.43077		54350.8	54935.2	53371.4								0.216059
	141	-8.41547		54351	54935.2	53371.5								8.93122
	141.247	-8.41873		54359.9	54936.5	53378.9								0.108882
	141.25	-8.10423		54360	54936.5	53379								1.30727
	141.286	-8.28833		54361.3	54936.6	53380								0.981258
	141.313	-8.0888		54362.3	54936.7	53380.8								6.81327
	141.5	-8.09293		54369.1	54937.4	53386.4								2.41097
	141.566	-7.95117		54371.5	54937.7	53388.3								0.109657
	141.569	-8.25477		54371.6	54937.7	53388.4								6.62539
	141.75	-8.37247		54378.3	54938.2	53393.7								3.41008
	141.843	-8.46397		54381.7	54938.6	53396.5								1.76119
	141.891	-8.30387		54383.4	54938.8	53397.8								6.90285
	142.079	-8.19863		54390.3	54939.7	53403.2								1.10191
	142.109	-8.1857		54391.4	54939.8	53404.1								4.15048
	142.222	-8.17217		54395.6	54940.3	53407.2								1.0283
	142.25	-8.23543		54396.6	54940.4	53408								4.25875
	142.366	-8.2023		54400.9	54940.8	53411.2								4.91511
	142.5	-8.17303		54405.8	54941.4	53414.8								2.16194
	142.559	-8.21683		54408	54941.6	53416.3								2.05047
	142.615	-8.2562		54410	54941.9	53417.8								4.13221
	142.728	-8.19553		54414.1	54942.4	53420.7								0.803564
	142.75	-8.12437		54414.9	54942.5	53421.2								3.86682
	142.856	-8.14187		54418.8	54943	53423.9								1.6389
	142.901	-8.1869		54420.4	54943.2	53425								3.59941
	143	-8.2613		54424	54943.7	53427.3								3.22897
	143.089	-8.3213		54427.3	54944.3	53429.4								5.75572
	143.248	-8.3623		54433	54945.3	53433								0.0723131
	143.25	-8.24103		54433.1	54945.3	53433								0.0361559
	143.251	-8.20843		54433.1	54945.3	53433								0.180773
	143.256	-8.28893		54433.3	54945.3	53433.1								0.0361532
	143.257	-8.53657		54433.4	54945.3	53433.2								0.325359
	143.266	-8.43427		54433.7	54945.4	53433.4								0.0361488
	143.267	-8.43447		54433.7	54945.4	53433.4								0.469896
	143.28	-8.351		54434.2	54945.5	53433.7								0.0361429
	143.281	-8.27017		54434.2	54945.5	53433.7								0.614369
	143.298	-8.2573		54434.8	54945.6	53434.1								0.0361358
	143.299	-8.36867		54434.9	54945.6	53434.1								0.505862
	143.313	-8.62883		54435.4	54945.7	53434.4								0.216776
	143.319	-8.65833		54435.6	54945.8	53434.5								0.14451
	143.323	-8.63193		54435.7	54945.8	53434.6								0.722469
	143.343	-8.4381		54436.5	54945.9	53435.1								0.288951
	143.351	-8.4358		54436.8	54946	53435.2								0.722294
	143.371	-8.36603		54437.5	54946.1	53435.7								0.505539
	143.385	-8.38303		54438	54946.2	53436								0.577697
	143.401	-8.3619		54438.6	54946.4	53436.3								0.830337
	143.424	-8.3801		54439.4	54946.5	53436.9								0.397079
	143.435	-8.32937		54439.8	54946.6	53437.1								1.19111
	143.468	-8.30537		54441	54946.9	53437.8								0.108275
	143.471	-8.16793		54441.1	54946.9	53437.9								1.0466
	143.5	-8.03557		54442.1	54947.1	53438.5								0.360877
	143.51	-8.03703		54442.5	54947.2	53438.7								0.324783
	143.519	-8.12983		54442.8	54947.3	53438.9								0.360864
	143.529	-8.45643		54443.2	54947.4	53439.2								0.829971
	143.552	-8.47567		54444	54947.5	53439.7								0.793878
	143.574	-8.65463		54444.8	54947.7	53440.1								0.793887
	143.596	-8.60577		54445.6	54947.9	53440.6								0.180432
	143.601	-8.6309		54445.8	54947.9	53440.7								1.26307
	143.636	-8.65317		54447	54948.2	53441.5								0.0721789
	143.638	-8.35127		54447.1	54948.3	53441.5								0.180449
	143.643	-8.29717		54447.3	54948.3	53441.6								1.80468
	143.693	-8.00137		54449.1	54948.7	53442.8								0.397088
	143.704	-8.3407		54449.5	54948.8	53443								1.22753
	143.738	-8.5511		54450.7	54949.1	53443.7								0.216652
	143.744	-8.52663		54450.9	54949.2	53443.9								0.216662
	143.75	-8.32687		54451.2	54949.2	53444								1.01122
	143.778	-8.35787		54452.2	54949.5	53444.6								0.722452
	143.798	-8.4924		54452.9	54949.7	53445.1								2.02363
	143.854	-8.5558		54454.9	54950.2	53446.3								0.180743
	143.859	-8.56163		54455.1	54950.2	53446.5								1.77188
	143.908	-8.38947		54456.9	54950.7	53447.6								0.10852
	143.911	-8.36713		54457	54950.7	53447.6								1.01308
	143.939	-8.2857		54458	54951	53448.3								0.0723789
	143.941	-8.63317		54458.1	54951	53448.3								0.180957
	143.946	-8.99323		54458.2	54951.1	53448.4								0.904998
	143.971	-8.74033		54459.1	54951.3	53449								1.05027
	144	-8.44263		54460.2	54951.6	53449.7								1.15954
	144.032	-8.02987		54461.4	54951.9	53450.4								0.326244
	144.041	-8.5413		54461.7	54952	53450.7								0.797726
	144.063	-8.78217		54462.5	54952.2	53451.2								0.108808
	144.066	-8.973		54462.6	54952.3	53451.2								0.399019
	144.077	-8.3942		54463	54952.4	53451.5								0.544263
	144.092	-8.36523		54463.5	54952.5	53451.9								1.08905
	144.122	-8.36137		54464.6	54952.9	53452.6								0.363179
	144.132	-8.61477		54465	54953	53452.8								0.18162
	144.137	-8.56263		54465.2	54953	53452.9								0.181641
	144.142	-8.85087		54465.3	54953.1	53453.1								0.654085
	144.16	-8.7405		54466	54953.3	53453.5								0.218091
	144.166	-8.58327		54466.2	54953.3	53453.7								0.399915
	144.177	-8.08073		54466.6	54953.4	53453.9								0.581889
	144.193	-8.01863		54467.2	54953.6	53454.3								1.16449
	144.225	-8.10963		54468.4	54954	53455.1								0.910443
	144.25	-8.48828		54469.3	54954.2	53455.7								1.56744
	144.293	-8.49595		54470.8	54954.7	53456.8								0.9122
	144.318	-8.54878		54471.8	54955	53457.5								1.57061
	144.361	-8.26067		54473.3	54955.5	53458.6								0.14621
	144.365	-8.8642		54473.5	54955.5	53458.7								2.37861
	144.43	-8.85167		54475.8	54956.3	53460.4								1.13627
	144.461	-8.96393		54477	54956.6	53461.3								0.953969
	144.487	-8.86973		54477.9	54957	53462								0.330431
	144.496	-8.9083		54478.3	54957.1	53462.2								0.146893
	144.5	-8.83498		54478.4	54957.1	53462.3								0.551046
	144.515	-8.73082		54479	54957.3	53462.8								2.09686
	144.572	-8.64058		54481.1	54958	53464.4								1.58499
	144.615	-8.97503		54482.6	54958.5	53465.6								1.07054
	144.644	-8.57147		54483.7	54958.9	53466.5								0.849991
	144.667	-8.62903		54484.6	54959.2	53467.2								1.81371
	144.716	-8.1472		54486.4	54959.8	53468.6								0.815621
	144.738	-8.2729		54487.2	54960.1	53469.3								0.148383
	144.742	-8.54857		54487.3	54960.1	53469.5								0.185518
	144.747	-9.0613		54487.5	54960.2	53469.6								0.111331
	144.75	-9.13523		54487.6	54960.2	53469.7								1.44874
	144.789	-8.74447		54489.1	54960.8	53470.9								1.56322
	144.831	-8.39147		54490.7	54961.3	53472.3								1.19321
	144.863	-8.2688		54491.8	54961.7	53473.3								0.709382
	144.882	-8.76327		54492.6	54962	53474								2.05742
	144.937	-8.64917		54494.6	54962.7	53475.8								0.037463
	144.938	-8.91137		54494.7	54962.8	53475.8								1.83812
	144.987	-8.5587		54496.5	54963.4	53477.5								0.488455
	145	-8.57467		54497	54963.6	53478								0.413562
	145.011	-8.3		54497.4	54963.8	53478.4								0.376166
	145.021	-8.6003		54497.8	54963.9	53478.7								1.28037
	145.055	-8.52153		54499.1	54964.4	53480								1.13151
	145.085	-8.58327		54500.2	54964.8	53481								1.05754
	145.113	-8.3804		54501.2	54965.2	53482.1								0.907566
	145.137	-8.52377		54502.1	54965.5	53483								0.83281
	145.159	-8.5648		54503	54965.9	53483.8								0.113629
	145.162	-8.8203		54503.1	54965.9	53483.9								2.73158
	145.234	-8.86673		54505.8	54967	53488.3								0.608155
	145.25	-8.7256		54506.4	54967.2	53489.5								1.02717
	145.277	-8.40797		54507.5	54967.6	53491.6								0.0761311
	145.279	-8.35853		54507.5	54967.6	53491.8								0.95215
	145.304	-8.72347		54508.5	54968	53493.8								0.114321
	145.307	-8.71227		54508.6	54968	53494								2.82405
	145.381	-8.68457		54511.4	54969.1	53500								0.26754
	145.388	-8.2029		54511.7	54969.2	53500.6								1.03256
	145.415	-8.1618		54512.7	54969.7	53502.8								0.918651
	145.439	-8.12937		54513.6	54970	53504.8								0.268081
	145.446	-8.50333		54513.9	54970.1	53505.3								0.306456
	145.454	-8.45163		54514.2	54970.2	53506								1.76368
	145.5	-8.36507		54516	54970.9	53509.9								1.03641
	145.527	-8.0855		54517	54971.4	53512.2								0.691413
	145.545	-8.08993		54517.7	54971.6	53513.7								1.65319
	145.588	-8.21997		54519.4	54972.3	53517.4								0.423236
	145.599	-8.22103		54519.8	54972.5	53518.3								0.30789
	145.607	-8.1964		54520.1	54972.6	53519								2.31128
	145.667	-8.193		54522.4	54973.5	53524.2								0.115658
	145.67	-8.22403		54522.5	54973.6	53524.5								1.58152
	145.711	-8.1052		54524.1	54974.2	53528.1								0.656204
	145.728	-8.01253		54524.8	54974.5	53529.6								0.463357
	145.74	-8.026		54525.2	54974.7	53530.7								0.386226
	145.75	-8.0267		54525.6	54974.8	53531.6								1.3138
	145.784	-8.1292		54526.9	54975.4	53534.6								0.270605
	145.791	-8.12423		54527.2	54975.5	53535.2								0.734694
	145.81	-8.23707		54527.9	54975.8	53537								2.12827
	145.865	-8.11507		54530.1	54976.6	53541.9								0.503358
	145.878	-8.12713		54530.6	54976.8	53543.1								0.580938
	145.893	-8.17987		54531.1	54977.1	53544.5								2.01502
	145.945	-8.24213		54533.2	54977.9	53549.2								2.01657
	145.997	-8.26017		54535.2	54978.7	53554								0.116384
	146	-8.08457		54535.3	54978.8	53554.3								0.426778
	146.011	-8.0874		54535.7	54978.9	53555.3								2.52299
	146.076	-7.93477		54538.2	54980	53561.4								0.737814
	146.095	-8.10373		54539	54980.3	53563.1								1.39831
	146.131	-8.02473		54540.4	54980.8	53566.5								0.310792
	146.139	-7.99157		54540.7	54981	53567.3								1.82626
	146.186	-7.96383		54542.5	54981.7	53571.7								0.544098
	146.2	-7.92843		54543.1	54981.9	53573								1.39929
	146.236	-7.89133		54544.5	54982.5	53576.4								0.15549
	146.24	-7.8358		54544.6	54982.6	53576.8								0.388736
	146.25	-7.8551		54545	54982.7	53577.7								0.272124
	146.257	-8.06827		54545.3	54982.8	53578.4								0.0777508
	146.259	-8.05007		54545.4	54982.9	53578.6								0.505392
	146.272	-8.17383		54545.9	54983.1	53579.8								1.74955
	146.317	-8.0874		54547.6	54983.8	53584								1.32195
	146.351	-8.217		54548.9	54984.3	53587.3								0.855377
	146.373	-8.14983		54549.8	54984.7	53589.4								0.311042
	146.381	-8.2398		54550.1	54984.8	53590.1								1.71066
	146.425	-8.23903		54551.8	54985.5	53594.3								0.0388765
	146.426	-8.07147		54551.8	54985.5	53594.4								0.0388764
	146.427	-8.0726		54551.9	54985.5	53594.5								2.02138
	146.479	-8.04		54553.9	54986.3	53599.4								0.583004
	146.494	-8.3719		54554.5	54986.6	53600.8								0.272052
	146.501	-8.40743		54554.8	54986.7	53601.5								0.194317
	146.506	-8.39433		54555	54986.8	53602								0.854923
	146.528	-8.30847		54555.8	54987.1	53604.1								1.12675
	146.557	-8.26077		54556.9	54987.5	53606.8								0.699237
	146.575	-8.28407		54557.6	54987.8	53608.5								0.42726
	146.586	-8.0833		54558.1	54988	53609.6								1.08738
	146.614	-8.10083		54559.1	54988.4	53612.2								0.155316
	146.618	-8.03897		54559.3	54988.5	53612.6								0.0776557
	146.62	-8.21273		54559.4	54988.5	53612.8								1.63039
	146.662	-8.21343		54561	54989.2	53616.8								0.194043
	146.667	-8.23573		54561.2	54989.2	53617.3								1.31918
	146.701	-8.29403		54562.5	54989.8	53620.5								0.504241
	146.714	-8.3082		54563	54990	53621.7								0.581706
	146.729	-8.17293		54563.6	54990.2	53623.1								0.155101
	146.733	-8.11547		54563.8	54990.3	53623.5								0.155092
	146.737	-8.07137		54563.9	54990.3	53623.9								0.503988
	146.75	-8.16917		54564.4	54990.5	53625.1								0.232577
	146.756	-8.1924		54564.7	54990.6	53625.7								0.58135
	146.771	-8.1425		54565.2	54990.8	53627.1								0.697439
	146.789	-8.2091		54565.9	54991.1	53628.8								0.154959
	146.793	-8.17003		54566.1	54991.2	53629.1								0.309887
	146.801	-8.1379		54566.4	54991.3	53629.9								0.929409
	146.825	-8.04263		54567.3	54991.6	53632.1								0.154864
	146.829	-7.96873		54567.5	54991.7	53632.5								0.658047
	146.846	-8.08603		54568.1	54992	53634.1								0.270901
	146.853	-8.03333		54568.4	54992.1	53634.7								0.696438
	146.871	-8.07923		54569.1	54992.3	53636.4								0.11605
	146.874	-8.03817		54569.2	54992.4	53636.7								0.0773626
	146.876	-8.09183		54569.3	54992.4	53636.9								0.580123
	146.891	-8.1321		54569.9	54992.6	53638.3								0.116004
	146.894	-8.02823		54570	54992.7	53638.6								0.425286
	146.905	-8.1354		54570.4	54992.8	53639.6								0.11597
	146.908	-8.18267		54570.5	54992.9	53639.9								0.309219
	146.916	-8.29397		54570.9	54993	53640.6								0.0772967
	146.918	-8.14673		54570.9	54993	53640.8								0.154584
	146.922	-8.09627		54571.1	54993.1	53641.2								0.0386438
	146.923	-8.07547		54571.1	54993.1	53641.3								0.0772852
	146.925	-8.1682		54571.2	54993.1	53641.4								1.23611
	146.957	-8.21737		54572.4	54993.6	53644.4								1.65968
	147	-8.1861		54574.1	54994.2	53648.4								1.00282
	147.026	-8.46377		54575.1	54994.6	53650.7								1.5418
	147.066	-8.44813		54576.6	54995.2	53654.4								0.500836
	147.079	-8.79283		54577.1	54995.4	53655.6								3.65649
	147.174	-8.50383		54580.8	54996.7	53664.2								1.30727
	147.208	-8.84617		54582.1	54997.2	53667.3								1.61397
	147.25	-8.50953		54583.7	54997.8	53671.1								1.22907
	147.282	-8.52653		54584.9	54998.3	53673.9								3.3391
	147.369	-8.1293		54588.3	54999.5	53681.7								0.76716
	147.389	-8.23775		54589.1	54999.8	53683.5								1.6489
	147.432	-8.89295		54590.7	55000.4	53687.3								2.41475
	147.495	-8.7914		54593.1	55001.3	53692.9								0.191599
	147.5	-8.99083		54593.3	55001.3	53693.3								3.90741
	147.602	-8.6211		54597.2	55002.8	53702.3								1.79989
	147.649	-8.82753		54599	55003.4	53706.5								2.29742
	147.709	-8.61837		54601.3	55004.3	53711.8								0.114866
	147.712	-8.9724		54601.4	55004.3	53712								1.45495
	147.75	-9.1218		54602.9	55004.9	53715.4								2.56538
	147.817	-9.23613		54605.4	55005.8	53721.3								3.59987
	147.911	-9.13073		54609	55007.2	53729.5								0.574571
	147.926	-8.83843		54609.6	55007.4	53730.9								2.83526
	148	-9.20247		54612.5	55008.5	53737.4								1.41817
	148.037	-9.13533		54613.9	55009.1	53740.6								0.996803
	148.063	-9.42457		54614.9	55009.5	53742.9								3.18373
	148.146	-9.2606		54618.1	55010.7	53750.3								0.115126
	148.149	-9.33647		54618.2	55010.8	53750.5								3.87837
	148.25	-9.45637		54622.1	55012.3	53759.5								0.538005
	148.264	-9.5745		54622.6	55012.6	53760.8								3.11497
	148.345	-9.81763		54625.7	55013.9	53768								1.34724
	148.38	-9.80753		54627.1	55014.4	53771.2								4.62568
	148.5	-9.98386		54631.7	55016.4	53782								4.0956
	148.606	-10.0428		54635.8	55018.3	53791.7								0.619067
	148.622	-10.0775		54636.4	55018.6	53793.2								2.01364
	148.674	-10.077		54638.4	55019.5	53798								1.78352
	148.72	-10.2676		54640.2	55020.3	53802.3								1.04787
	148.747	-10.234		54641.2	55020.8	53804.8								0.116477
	148.75	-10.1525		54641.4	55020.9	53805.1								0.388327
	148.76	-10.1455		54641.7	55021.1	53806								1.94328
	148.81	-10.2633		54643.7	55022	53810.7								2.45258
	148.873	-10.3327		54646.1	55023.2	53816.7								0.428709
	148.884	-10.2651		54646.6	55023.5	53817.7								4.53004
	149	-10.0391		54651.1	55025.8	53828.9								4.97774
	149.127	-9.96815		54656.1	55028.5	53841.3								1.57127
	149.167	-9.98032		54657.6	55029.3	53845.2								3.26509
	149.25	-10.0033		54660.9	55031.2	53853.5								0.0787497
	149.252	-10.0543		54661	55031.2	53853.7								4.84893
	149.375	-10.0425		54665.8	55034	53866.1								0.0394653
	149.376	-10.1976		54665.9	55034	53866.2								2.17153
	149.431	-9.9999		54668	55035.3	53871.8								2.64755
	149.498	-9.95867		54670.7	55036.9	53878.7								0.079065
	149.5	-9.6837		54670.8	55036.9	53878.9								4.31146
	149.609	-9.96647		54675.1	55039.5	53890.2								0.316598
	149.617	-10.0473		54675.4	55039.7	53891								4.51311
	149.731	-10.2812		54679.9	55042.4	53902.9								0.752386
	149.75	-10.0671		54680.7	55042.9	53904.9								0.752417
	149.769	-9.82523		54681.4	55043.4	53906.9								2.85137
	149.841	-9.88553		54684.3	55045.1	53914.6								0.51482
	149.854	-10.1283		54684.8	55045.5	53916								3.64283
	149.946	-10.3523		54688.4	55047.7	53925.8								2.13746
	150	-10.3087		54690.6	55049.1	53931.6								1.06844
	150.027	-10.1093		54691.6	55049.8	53934.5								0.672602
	150.044	-10.1521		54692.3	55050.2	53936.3								1.97763
	150.094	-10.2825		54694.3	55051.4	53941.7								1.66041
	150.136	-10.3445		54695.9	55052.5	53946.2								3.19973
	150.217	-10.2921		54699.1	55054.5	53955								0.118438
	150.22	-10.2223		54699.3	55054.6	53955.4								1.18407
	150.25	-10.2642		54700.4	55055.3	53958.6								1.81443
	150.296	-10.3663		54702.3	55056.4	53963.7								0.749006
	150.315	-10.4747		54703	55056.9	53965.8								1.41843
	150.351	-10.5225		54704.4	55057.8	53969.7								0.433205
	150.362	-10.4912		54704.9	55058.1	53970.9								2.24317
	150.419	-10.4446		54707.1	55059.5	53977.2								0.865023
	150.441	-10.4867		54708	55060	53979.6								0.943148
	150.465	-10.5969		54708.9	55060.6	53982.2								1.37442
	150.5	-10.6528		54710.3	55061.5	53986.1								0.90252
	150.523	-10.8085		54711.2	55062	53988.6								0.11768
	150.526	-10.6185		54711.3	55062.1	53989								0.0784478
	150.528	-10.5328		54711.4	55062.2	53989.2								0.0392223
	150.529	-10.3322		54711.4	55062.2	53989.3								0.117661
	150.532	-10.3653		54711.5	55062.3	53989.6								0.156866
	150.536	-10.4621		54711.7	55062.4	53990.1								0.0784265
	150.538	-10.5925		54711.8	55062.4	53990.3								0.0392117
	150.539	-10.6566		54711.8	55062.4	53990.4								0.0784201
	150.541	-10.696		54711.9	55062.5	53990.6								0.0392084
	150.542	-10.645		54711.9	55062.5	53990.7								0.666378
	150.559	-10.642		54712.6	55062.9	53992.6								0.235117
	150.565	-10.4029		54712.8	55063.1	53993.3								0.783431
	150.585	-10.2419		54713.6	55063.5	53995.5								0.156632
	150.589	-10.2266		54713.8	55063.6	53995.9								0.626344
	150.605	-10.2205		54714.4	55064	53997.7								0.978061
	150.63	-10.1721		54715.4	55064.6	54000.5								0.15642
	150.634	-10.1503		54715.5	55064.7	54000.9								0.234594
	150.64	-10.334		54715.8	55064.9	54001.6								1.09419
	150.668	-10.2871		54716.9	55065.5	54004.7								1.01515
	150.694	-10.2725		54717.9	55066.2	54007.6								1.17023
	150.724	-9.9626		54719.1	55066.9	54010.9								0.623631
	150.74	-10.127		54719.7	55067.3	54012.7								0.389592
	150.75	-10.0745		54720.1	55067.5	54013.8								0.817692
	150.771	-10.261		54720.9	55068	54016.2								1.32256
	150.805	-10.1296		54722.2	55068.8	54019.9								0.310946
	150.813	-10.2164		54722.5	55069	54020.8								2.17394
	150.869	-10.2232		54724.7	55070.3	54027.1								1.8595
	150.917	-10.2582		54726.6	55071.4	54032.4								0.154792
	150.921	-10.2548		54726.7	55071.5	54032.9								2.24151
	150.979	-10.289		54728.9	55072.8	54039.4								0.347317
	150.988	-10.4079		54729.3	55073	54040.4								0.462878
	151	-10.2755		54729.8	55073.2	54041.7								2.07993
	151.054	-10.2556		54731.8	55074.4	54047.8								0.461534
	151.066	-10.11		54732.3	55074.7	54049.1								2.53401
	151.132	-10.0938		54734.8	55076.1	54056.5								1.03446
	151.159	-10.103		54735.9	55076.7	54059.5								3.47707
	151.25	-10.1322		54739.3	55078.6	54069.8								0.304973
	151.258	-10.0946		54739.7	55078.8	54070.7								1.67529
	151.302	-10.0145		54741.3	55079.7	54075.7								0.0760668
	151.304	-10.1175		54741.4	55079.7	54075.9								7.41889
	151.5	-10.1139		54748.8	55083.6	54098.3								8.53851
	151.728	-10.1329		54757.4	55087.8	54125								0.818509
	151.75	-10.0541		54758.2	55088.2	54127.6								0.18589
	151.755	-10.1822		54758.4	55088.3	54128.2								1.44823
	151.794	-10.059		54759.8	55088.9	54132.9								6.86441
	151.98	-10.1436		54766.7	55091.9	54155.4								0.733852
	152	-9.97083		54767.4	55092.2	54157.9								2.23305
	152.061	-10.1494		54769.6	55093.1	54165.5								2.55279
	152.131	-9.92763		54772.2	55094.1	54174.3								4.31547
	152.25	-10.1404		54776.5	55095.8	54189.5								0.0722647
	152.252	-10.1919		54776.6	55095.8	54189.8								5.50191
	152.405	-10.3827		54782.1	55097.7	54209.9								3.21176
	152.495	-10.2261		54785.3	55098.7	54222								0.177887
	152.5	-10.1796		54785.5	55098.7	54222.7								1.38554
	152.539	-10.2318		54786.9	55099.1	54228.1								7.43436
	152.75	-10.3526		54794.3	55101	54257.8								0.838903
	152.774	-10.4251		54795.1	55101.2	54261.3								2.09116
	152.834	-10.5056		54797.2	55101.7	54270.1								1.38923
	152.874	-10.4375		54798.6	55101.9	54276								4.35064
	153	-10.3849		54803	55102.7	54295.1								4.52694
	153.132	-10.4381		54807.5	55103.3	54315.6								0.787238
	153.155	-10.5884		54808.3	55103.4	54319.3								3.25166
	153.25	-10.6147		54811.5	55103.8	54334.4								0.0684968
	153.252	-10.3395		54811.6	55103.8	54334.7								6.08377
	153.429	-10.4058		54817.7	55104.5	54363.4								2.46017
	153.5	-10.3981		54820.1	55104.8	54375								1.28853
	153.537	-10.5403		54821.4	55105	54381								2.80424
	153.617	-10.3896		54824.2	55105.4	54394.1								3.54717
	153.717	-10.5495		54827.8	55106	54410.5								1.1824
	153.75	-10.6521		54829	55106.2	54415.9								5.68388
	153.906	-10.7622		54834.6	55107.4	54441.1								1.78426
	153.954	-10.633		54836.4	55107.9	54448.8								1.46341
	153.993	-10.8123		54837.9	55108.3	54455								0.264015
	154	-10.6402		54838.2	55108.3	54456.2								9.7321
	154.25	-10.7873		54847.9	55111.8	54494.9								9.74019
	154.484	-10.6877		54857.6	55116.6	54528.9								0.388684
	154.493	-10.8367		54858	55116.9	54530.2								0.303079
	154.5	-10.7278		54858.3	55117	54531.2								2.58176
	154.559	-10.6894		54860.9	55118.6	54539.3								5.77666
	154.687	-10.5425		54866.7	55122.4	54556.1								0.415635
	154.696	-10.557		54867.1	55122.6	54557.3								2.52105
	154.75	-10.559		54869.6	55124.5	54564								3.92039
	154.832	-10.7365		54873.5	55127.5	54573.9								0.194164
	154.836	-10.5108		54873.7	55127.6	54574.4								2.45065
	154.886	-10.4928		54876.2	55129.6	54580.1								3.05034
	154.947	-10.3407		54879.2	55132.2	54586.9								2.70557
	155	-10.5043		54881.9	55134.6	54592.6								1.29401
	155.025	-10.3454		54883.2	55135.8	54595.2								1.67287
	155.057	-10.5822		54884.9	55137.3	54598.4								0.684886
	155.07	-10.6056		54885.6	55138	54599.7								0.317127
	155.076	-10.5554		54885.9	55138.3	54600.3								1.59533
	155.106	-10.3125		54887.5	55139.8	54603.2								0.749996
	155.12	-10.1005		54888.3	55140.5	54604.6								0.268703
	155.125	-9.95305		54888.5	55140.8	54605.1								0.161435
	155.128	-9.80702		54888.7	55140.9	54605.3								0.485267
	155.137	-9.62495		54889.2	55141.4	54606.2								0.486706
	155.146	-9.67473		54889.7	55141.9	54607								0.379543
	155.153	-9.7402		54890	55142.2	54607.7								0.0542913
	155.154	-9.9096		54890.1	55142.3	54607.8								0.326119
	155.16	-9.76227		54890.4	55142.6	54608.4								0.818084
	155.175	-9.8214		54891.2	55143.4	54609.7								0.273577
	155.18	-9.79427		54891.5	55143.7	54610.2								1.20897
	155.202	-9.8196		54892.7	55144.9	54612.2								0.386455
	155.209	-9.963		54893.1	55145.3	54612.9								0.88655
	155.225	-9.9554		54894	55146.2	54614.3								1.39419
	155.25	-10.1413		54895.4	55147.6	54616.5								0.168034
	155.253	-10.132		54895.6	55147.8	54616.8								0.842514
	155.268	-9.9966		54896.4	55148.6	54618.1								0.507381
	155.277	-10.1896		54896.9	55149.2	54618.8								0.792044
	155.291	-9.9689		54897.7	55150	54620								0.909334
	155.307	-10.3122		54898.6	55150.9	54621.4								2.11968
	155.344	-10.4121		54900.7	55153.1	54624.5								1.15552
	155.364	-10.2941		54901.9	55154.4	54626.1								0.173916
	155.367	-10.2793		54902.1	55154.5	54626.4								0.813628
	155.381	-9.91797		54902.9	55155.4	54627.5								2.99197
	155.432	-10.2183		54905.9	55158.6	54631.6								1.24471
	155.453	-10.2928		54907.1	55159.9	54633.2								0.654933
	155.464	-10.5965		54907.8	55160.7	54634.1								1.85657
	155.495	-10.3617		54909.6	55162.7	54636.4								0.060155
	155.496	-9.91827		54909.7	55162.7	54636.5								0.240786
	155.5	-9.7011		54909.9	55163	54636.8								0.0602378
	155.501	-9.98593		54910	55163.1	54636.9								4.13485
	155.569	-10.4653		54914.1	55167.6	54641.9								0.122762
	155.571	-10.6528		54914.2	55167.7	54642.1								1.78737
	155.6	-10.6487		54916	55169.7	54644.2								2.23778
	155.636	-10.1361		54918.3	55172.2	54646.8								0.312458
	155.641	-10.1015		54918.6	55172.5	54647.1								1.25385
	155.661	-10.1811		54919.8	55173.9	54648.5								0.566325
	155.67	-10.0558		54920.4	55174.6	54649.2								2.46902
	155.709	-10.1		54922.9	55177.3	54651.9								0.700762
	155.72	-10.0432		54923.6	55178.1	54652.6								1.34313
	155.741	-10.6311		54924.9	55179.6	54654.1								0.577758
	155.75	-10.3237		54925.5	55180.3	54654.7								1.48228
	155.773	-10.3334		54927	55181.9	54656.2								2.07607
	155.805	-9.7009		54929	55184.3	54658.4								0.456266
	155.812	-10.0239		54929.5	55184.8	54658.9								0.195775
	155.815	-10.0087		54929.7	55185	54659.1								1.11203
	155.832	-10.6948		54930.8	55186.3	54660.2								2.7003
	155.873	-10.5849		54933.5	55189.3	54662.9								0.662526
	155.883	-10.6393		54934.2	55190	54663.6								0.265439
	155.887	-10.5351		54934.4	55190.3	54663.8								0.332142
	155.892	-9.79563		54934.8	55190.7	54664.2								2.20168
	155.925	-9.7647		54937	55193.2	54666.3								0.133967
	155.927	-9.74147		54937.1	55193.4	54666.5								0.670742
	155.937	-10.4939		54937.8	55194.1	54667.1								1.27857
	155.956	-10.4619		54939.1	55195.5	54668.3								0.742709
	155.967	-10.5037		54939.8	55196.4	54669.1								0.541293
	155.975	-10.5337		54940.3	55197	54669.6								0.0677291
	155.976	-10.4336		54940.4	55197.1	54669.7								0.203277
	155.979	-10.4498		54940.6	55197.3	54669.8								1.42671
	156	-9.89027		54942	55198.9	54671.2								0.2725
	156.004	-9.26287		54942.3	55199.2	54671.5								1.02399
	156.019	-9.13213		54943.3	55200.4	54672.5								2.74694
	156.059	-9.5272		54946.1	55203.4	54675.1								2.63139
	156.097	-10.0858		54948.7	55206.4	54677.5								2.65244
	156.135	-9.98587		54951.4	55209.3	54680								2.1793
	156.166	-9.18257		54953.5	55211.8	54682								0.564642
	156.174	-9.0863		54954.1	55212.4	54682.6								2.90814
	156.215	-8.92177		54957	55215.6	54685.3								1.42727
	156.235	-9.08027		54958.4	55217.2	54686.6								1.07416
	156.25	-8.5415		54959.5	55218.4	54687.6								0.646017
	156.259	-8.54763		54960.2	55219.1	54688.2								3.53709
	156.308	-8.89747		54963.7	55222.9	54691.5								4.08317
	156.364	-9.09743		54967.8	55227.4	54695.3								4.64485
	156.427	-8.70657		54972.4	55232.3	54699.7								5.449
	156.5	-8.2563		54977.9	55238.1	54705								6.28107
	156.583	-8.04077		54984.2	55244.6	54711.2								7.14382
	156.676	-8.1298		54991.3	55251.9	54718.4								5.76265
	156.75	-8.25663		54997.1	55257.6	54724.5								2.27694
	156.779	-8.39217		54999.3	55259.9	54726.9								1.57634
	156.799	-8.3162		55000.9	55261.4	54728.7								7.47397
	156.893	-8.35777		55008.4	55268.5	54737								0.240282
	156.896	-8.1247		55008.6	55268.7	54737.3								8.39531
	157	-8.26903		55017	55276.4	54747.3								1.30264
	157.016	-8.2526		55018.3	55277.6	54748.9								9.44456
	157.131	-8.40197		55027.8	55285.8	54760.8								1.49079
	157.149	-8.3852		55029.3	55287.1	54762.7								8.42383
	157.25	-8.65697		55037.7	55294.2	54773.9								3.44678
	157.291	-8.7996		55041.1	55297	54778.5								5.07067
	157.351	-8.64893		55046.2	55301.1	54785.5								7.83265
	157.443	-8.53243		55054	55307.3	54796.5								4.28412
	157.493	-8.52813		55058.3	55310.6	54802.6								0.601225
	157.5	-8.91053		55058.9	55311	54803.5								8.97178
	157.604	-9.02303		55067.9	55317.9	54816.5								12.7061
	157.75	-9.27267		55080.6	55327.3	54835.3								2.18707
	157.775	-9.26303		55082.8	55328.9	54838.5								7.36965
	157.859	-9.26763		55090.2	55334.3	54849.5								1.93509
	157.881	-9.3025		55092.1	55335.7	54852.4								6.43393
	157.954	-9.31967		55098.5	55340.4	54862.1								4.06341
	158	-9.4449		55102.6	55343.3	54868.2								12.5784
	158.142	-9.47743		55115.2	55352.3	54887.1								9.59076
	158.25	-9.51037		55124.8	55359.1	54901.5								3.73279
	158.292	-9.66277		55128.5	55361.8	54907								4.17803
	158.339	-9.59597		55132.7	55364.7	54913.2								6.66687
	158.414	-9.5055		55139.3	55369.5	54923								7.64034
	158.5	-9.35487		55147	55375	54934.1								3.90558
	158.544	-9.35277		55150.9	55377.9	54939.7								15.9357
	158.724	-9.62427		55166.8	55389.7	54962.1								2.29441
	158.75	-9.61497		55169.1	55391.4	54965.2								0.617337
	158.757	-9.6363		55169.7	55391.8	54966.1								19.4748
	158.979	-9.4062		55189.2	55406.9	54991.6								1.8302
	159	-9.41903		55191	55408.3	54993.9								0.783688
	159.009	-9.3111		55191.8	55409	54994.9								14.2077
	159.173	-9.5332		55206	55420.5	55012								3.10003
	159.209	-9.52303		55209.1	55423.1	55015.6								3.52226
	159.25	-9.62387		55212.6	55426	55019.7								16.7134
	159.446	-9.33087		55229.4	55440	55038.1								4.56787
	159.5	-9.3348		55233.9	55443.9	55043								11.5158
	159.637	-9.44997		55245.4	55453.7	55055								0.250985
	159.64	-9.54003		55245.7	55453.9	55055.2								4.34225
	159.692	-9.49147		55250	55457.6	55059.6								4.82496
	159.75	-9.36133		55254.9	55461.8	55064.5								16.0778
	159.945	-9.40117		55270.9	55475.3	55080.3								4.49392
	160	-9.43483		55275.4	55479.1	55084.7								9.17548
	160.113	-9.56143		55284.6	55486.6	55093.6								7.41241
	160.205	-9.60557		55292	55492.6	55100.7								3.60647
	160.25	-9.63447		55295.6	55495.5	55104.2								4.07196
	160.301	-9.49437		55299.7	55498.7	55108.1								13.5322
	160.472	-9.46577		55313.2	55509	55121.4								2.19785
	160.5	-9.46943		55315.4	55510.6	55123.6								7.57435
	160.597	-9.61437		55323	55516	55131.2								11.5901
	160.747	-9.63213		55334.6	55523.8	55143.2								0.230264
	160.75	-9.68377		55334.8	55524	55143.4								17.8466
	160.985	-9.52053		55352.7	55534.6	55163								1.12654
	161	-9.5754		55353.8	55535.2	55164.3								2.09935
	161.028	-9.55427		55355.9	55536.3	55166.7								4.41019
	161.087	-9.73513		55360.3	55538.6	55171.9								12.1156
	161.25	-9.6909		55372.4	55544.4	55186.5								4.96387
	161.317	-9.72323		55377.4	55546.7	55192.7								13.565
	161.5	-9.6266		55391	55552.8	55210								5.87893
	161.579	-9.72583		55396.8	55555.5	55217.6								2.46304
	161.612	-9.69653		55399.3	55556.6	55220.8								5.54306
	161.686	-9.58607		55404.8	55559.3	55228								17.2418
	161.913	-9.44667		55422.1	55568.4	55250.7								6.73413
	162	-9.37757		55428.8	55572.4	55259.5								5.56001
	162.071	-9.60607		55434.4	55576	55266.8								11.9664
	162.221	-9.60453		55446.3	55584.5	55282.3								2.3517
	162.25	-9.6188		55448.7	55586.4	55285.3								12.3034
	162.399	-9.40143		55461	55596.7	55300.8								8.57039
	162.5	-9.45337		55469.6	55604.8	55311.3								3.01734
	162.535	-9.51443		55472.6	55607.8	55315								2.08379
	162.559	-9.777		55474.7	55609.9	55317.5								17.0415
	162.75	-9.8647		55491.7	55629	55337.4								9.7439
	162.855	-9.8622		55501.5	55641.3	55348.4								13.9387
	163	-9.83713		55515.4	55660.5	55363.4								4.04359
	163.041	-9.87133		55519.4	55666.4	55367.7								7.70481
	163.118	-9.7353		55527.1	55678	55375.6								6.40284
	163.181	-9.64243		55533.5	55687.9	55382.1								7.10449
	163.25	-9.65187		55540.6	55699.3	55389.1								26.3808
	163.5	-9.88307		55567	55743.5	55414.2								1.28589
	163.512	-9.83277		55568.3	55745.7	55415.4								0.21445
	163.514	-9.72915		55568.5	55746.1	55415.6								25.4997
	163.75	-9.65855		55594	55790.9	55438.6								9.3398
	163.836	-9.5079		55603.4	55807.5	55446.8								1.41171
	163.849	-9.54767		55604.8	55810	55448								13.5517
	163.974	-9.6309		55618.3	55834.2	55459.7								2.81018
	164	-9.8306		55621.1	55839.2	55462.1								20.5832
	164.192	-9.88843		55641.7	55875.6	55479.3								6.13772
	164.25	-9.8299		55647.9	55886.2	55484.4								17.5854
	164.419	-9.87467		55665.4	55916.2	55498.8								8.23716
	164.5	-9.90183		55673.7	55929.7	55505.5								3.91453
	164.539	-9.888		55677.6	55936.1	55508.6								0.997988
	164.549	-9.698		55678.6	55937.7	55509.4								19.5058
	164.75	-9.7729		55698.1	55967.5	55525								8.80552
	164.845	-9.83087		55706.9	55979.9	55531.9								4.24589
	164.892	-9.98237		55711.2	55985.5	55535.3								9.45837
	165	-9.98273		55720.6	55997.3	55542.8								20.3257
	165.25	-9.95024		55740.9	56018	55558.7								18.3276
	165.5	-10.0285		55759.3	56031.3	55572.8								7.6266
	165.612	-9.90268		55766.9	56035.3	55578.5								1.26038
	165.631	-9.9554		55768.2	56035.8	55579.4								7.68403
	165.75	-9.9387		55775.8	56038.8	55584.9								11.2148
	165.934	-9.80647		55787.1	56041.7	55591.9								2.6288
	165.979	-9.6632		55789.7	56042.2	55592.7								0.636167
	165.99	-9.64467		55790.3	56042.3	55592.9								0.576177
	166	-9.7829		55790.9	56042.3	55593.1								13.7823
	166.25	-9.811		55804.7	56043.7	55597.2								4.07752
	166.328	-9.768		55808.8	56043.9	55598.3								1.13291
	166.35	-9.66557		55809.9	56044	55598.6								7.53984
	166.5	-9.7249		55817.4	56044.6	55600.3								4.76906
	166.598	-9.551		55822.2	56045.2	55601.2								2.34352
	166.647	-9.67		55824.5	56045.6	55601.6								3.67985
	166.725	-9.64903		55828.2	56046.4	55602.2								1.16728
	166.75	-9.75803		55829.4	56046.8	55602.3								9.07059
	166.948	-9.7327		55838.5	56050.6	55603.2								2.3397
	167	-9.74997		55840.8	56052.1	55603.3								4.63491
	167.104	-9.80597		55845.4	56055.5	55603.5								5.67312
	167.233	-9.81437		55851.1	56060.8	55603.5								0.349252
	167.241	-9.56853		55851.5	56061.2	55603.5								0.392567
	167.25	-9.5967		55851.8	56061.6	55603.5								10.1332
	167.485	-9.63387		55862	56073.9	55603.5								0.639878
	167.5	-9.91737		55862.6	56074.8	55603.5								0.127886
	167.503	-9.861		55862.7	56075	55603.5								10.4395
	167.75	-9.87383		55873.2	56091.4	55603.5								0.503281
	167.762	-9.8281		55873.7	56092.2	55603.5								4.14126
	167.861	-9.59617		55877.8	56099.6	55603.5								0.333882
	167.869	-9.5151		55878.2	56100.2	55603.5								5.45432
	168	-9.502		55883.6	56110.6	55603.5								0.373966
	168.009	-9.70323		55884	56111.4	55603.5								9.87081
	168.247	-9.66703		55893.9	56131.8	55603.5								0.124331
	168.25	-9.65803		55894	56132.1	55603.5								0.207221
	168.255	-9.60777		55894.2	56132.5	55603.5								8.38092
	168.457	-9.43197		55902.6	56151.1	55603.5								0.873123
	168.478	-9.33833		55903.4	56153.1	55603.5								0.915247
	168.5	-9.39307		55904.4	56155.2	55603.5								6.00792
	168.644	-9.56203		55910.4	56169	55603.5								2.43028
	168.702	-9.57753		55912.8	56174.7	55603.5								2.01676
	168.75	-9.52127		55914.8	56179.4	55603.5								7.31808
	168.923	-9.4753		55922.1	56196.6	55603.5								3.28558
	169	-9.4486		55925.4	56204.2	55603.5								1.06991
	169.025	-9.16937		55926.5	56206.7	55603.5								0.38544
	169.034	-9.16953		55926.9	56207.6	55603.5								4.58817
	169.141	-9.1334		55931.5	56218.3	55603.5								4.66831
	169.25	-9.37773		55936.1	56229.2	55603.5								4.63867
	169.359	-9.4044		55940.8	56239.8	55603.5								2.82615
	169.426	-9.42173		55943.6	56243.1	55603.5								3.09107
	169.5	-9.414		55946.7	56246.8	55603.5								2.7241
	169.566	-8.97223		55949.4	56250.1	55603.5								0.450612
	169.577	-8.94423		55949.9	56250.6	55603.5								6.93424
	169.75	-8.90227		55956.8	56259.2	55603.5								1.86544
	169.798	-9.22857		55958.7	56261.5	55603.5								0.807051
	169.819	-9.2142		55959.5	56262.6	55603.5								6.69852
	170	-9.15657		55966.2	56271.4	55604.2								0.814871
	170.023	-9.09223		55967	56272.5	55604.4								1.84335
	170.076	-8.54667		55968.8	56275	55604.9								4.49371
	170.212	-8.5626		55973.3	56281.5	55606								1.19013
	170.25	-8.56317		55974.5	56283.3	55606.3								0.12352
	170.254	-8.9207		55974.6	56283.5	55606.3								3.6636
	170.493	-8.6773		55978.3	56294.5	55607.9								0.088027
	170.5	-8.701		55978.4	56294.8	55607.9								0.669413
	170.555	-8.3569		55979.1	56297.3	55608.2								0.584542
	170.606	-8.4324		55979.6	56299.6	55608.4								1.36985
	170.741	-8.1501		55981	56305.5	55608.9								0.081771
	170.75	-8.3291		55981.1	56305.9	55608.9								1.75532
	171	-8.04225		55982.8	56316.5	55608.9								0.762189
	171.25	-7.96888		55983.6	56326.3	55608.9								0.0236135
	171.271	-7.91528		55983.6	56327.1	55608.9								0.0265003
	171.394	-7.97743		55983.7	56331.5	55608.9								0.00111141
	171.411	-7.8162		55983.7	56332.1	55608.9								0.00581856
	171.5	-7.78063		55983.7	56335	55608.9								0.00353036
	171.554	-7.77043		55983.7	56336.7	55608.9								0.0128139
	171.75	-7.929		55983.7	56342.2	55608.9								0.00241895
	171.787	-7.97807		55983.7	56343.1	55608.9								0.000130754
	171.789	-7.84787		55983.7	56343.1	55608.9								0.00385725
	171.848	-7.83243		55983.7	56344.5	55608.9								0.00993732
	172	-7.7879		55983.7	56347.4	55608.9								0.00895666
	172.137	-7.80637		55983.7	56349.3	55608.9								0.000915279
	172.151	-7.81463		55983.7	56349.5	55608.9								0.00189594
	172.18	-7.92077		55983.7	56349.8	55608.9								0.0045764
	172.25	-7.93753		55983.7	56350.3	55608.9								0.0136638
	172.459	-7.80553		55983.7	56350.7	55608.9								0.000326885
	172.464	-7.6499		55983.7	56350.7	55608.9								0.00235358
	172.5	-7.68103		55983.7	56350.7	55608.9								0.00477253
	172.573	-7.9511		55983.7	56350.7	55608.9								0.0115717
	172.75	-8.0401		55983.7	56350.7	55608.9								0.000523017
	172.758	-7.9784		55983.7	56350.7	55608.9								0.00163443
	172.783	-7.83783		55983.8	56350.7	55608.9								0.011964
	172.966	-7.87657		55983.8	56350.7	55608.9								0.00222282
	173	-8.00843		55983.8	56350.7	55608.9								0.00235358
	173.036	-7.88223		55983.8	56350.7	55608.9								0.0048379
	173.11	-7.79077		55983.8	56350.7	55608.9								0.00915279
	173.25	-7.76533		55983.8	56350.7	55608.9								0.00294197
	173.295	-7.80307		55983.8	56350.7	55608.9								0.00418413
	173.359	-7.84127		55983.8	56350.7	55608.9								0.0054263
	173.442	-7.8368		55983.8	56350.7	55609.1								0.00379187
	173.5	-7.9454		55983.8	56350.7	55609.2								0.00268046
	173.541	-7.83063		55983.8	56350.7	55609.4								0.0136638
	173.75	-7.81497		55983.8	56350.7	55610.3								0.00142249
	173.751	-7.88563		55983.8	56350.7	55610.3								0.034505
	173.774	-7.9257		55983.8	56350.7	55610.5								0.0079541
	173.779	-7.92883		55983.9	56350.7	55610.5								0.505799
	173.998	-7.81757		55984.4	56350.7	55612.1								0.00602653
	174	-7.8387		55984.4	56350.7	55612.1								0.403892
	174.119	-7.8455		55984.8	56350.7	55613.1								0.096123
	174.144	-7.951		55984.9	56350.7	55613.3								0.294171
	174.215	-7.97017		55985.2	56350.7	55614								0.15649
	174.25	-8.06143		55985.3	56350.7	55614.4								0.923306
	174.43	-8.01577		55986.2	56350.7	55616.3								0.184733
	174.462	-8.0049		55986.4	56350.7	55616.7								0.227372
	174.5	-7.9463		55986.7	56350.7	55617.2								0.223387
	174.536	-7.96047		55986.9	56350.7	55617.6								0.723405
	174.645	-7.96723		55987.6	56350.7	55618.9								0.763121
	174.75	-7.99083		55988.4	56350.7	55620.3								0.441223
	174.807	-7.91073		55988.8	56350.7	55621.1								0.443579
	174.862	-7.91337		55989.3	56350.7	55621.8								0.555265
	174.928	-7.8743		55989.8	56350.7	55622.7								0.634144
	175	-7.90843		55990.4	56350.7	55623.7								0.777302
	175.084	-7.9501		55991.2	56350.7	55624.9								0.668778
	175.153	-7.97553		55991.9	56350.7	55626								1.7789
	175.25	-8.0204		55993.7	56350.7	55628.2								1.38294
	175.315	-8.01293		55995	56350.7	55630.2								0.130122
	175.321	-7.99343		55995.2	56350.7	55630.4								4.02674
	175.498	-7.96877		55999.2	56351.1	55636.2								0.0475847
	175.5	-7.97483		55999.3	56351.1	55636.3								1.40029
	175.558	-7.94267		56000.7	56351.6	55638.3								3.93561
	175.713	-7.8708		56004.6	56353.6	55644.1								0.981238
	175.75	-7.85973		56005.6	56354.2	55645.5								1.73542
	175.814	-7.9495		56007.3	56355.3	55648								0.77447
	175.842	-8.05653		56008.1	56355.9	55649.2								4.54452
	176	-8.0532		56012.6	56359.4	55656								2.65999
	176.088	-8.1612		56015.3	56361.6	55660.1								0.524526
	176.105	-8.0364		56015.8	56362.1	55660.9								2.45102
	176.183	-8.09327		56018.3	56364.2	55664.7								2.16367
	176.25	-8.0212		56020.4	56366.1	55668.2								4.42099
	176.382	-8.14967		56024.8	56370.1	55675.3								4.05914
	176.498	-8.03407		56028.9	56373.7	55682.1								0.0714175
	176.5	-7.92857		56029	56373.8	55682.2								0.752821
	176.521	-7.93893		56029.7	56374.4	55683.5								6.59701
	176.699	-7.9781		56036.3	56380.1	55695								1.96159
	176.75	-7.90753		56038.3	56381.7	55698.5								4.1392
	176.855	-7.89827		56042.4	56385	55706								1.40991
	176.89	-7.8961		56043.8	56386	55708.7								4.52944
	177	-7.87643		56048.4	56389.3	55717.2								1.81032
	177.043	-7.95063		56050.2	56390.5	55720.7								6.08355
	177.184	-7.95763		56056.3	56394.3	55732.5								2.92098
	177.25	-8.04767		56059.2	56396.1	55738.3								1.47705
	177.283	-7.94033		56060.7	56396.9	55741.1								6.01235
	177.415	-8.0323		56066.7	56400.2	55752.9								3.95403
	177.5	-8.10557		56070.6	56402.2	55760.6								0.281397
	177.506	-8.0941		56070.9	56402.4	55761.1								8.08857
	177.676	-8.02597		56079	56406.3	55776.4								3.58507
	177.75	-8.01017		56082.6	56407.9	55783								3.32495
	177.818	-8.21773		56085.9	56409.4	55788.9								0.147324
	177.821	-8.20677		56086.1	56409.5	55789.2								8.8774
	178	-8.16903		56094.9	56413.4	55804.4								3.46238
	178.069	-7.9745		56098.4	56414.9	55809.9								2.92496
	178.127	-8.0404		56101.3	56416.1	55814.5								6.24001
	178.25	-8.02903		56107.6	56418.8	55822.1								0.356424
	178.257	-8.21817		56107.9	56419	55822.3								8.58529
	178.425	-8.18263		56116.5	56422.6	55827.9								1.89683
	178.462	-8.30107		56118.4	56423.5	55828.9								1.9495
	178.5	-8.12783		56120.3	56424.3	55830								10.8319
	178.711	-8.12633		56131.2	56429.2	55835								1.12834
	178.733	-8.1529		56132.3	56429.7	55835.4								0.871559
	178.75	-8.1369		56133.2	56430.1	55835.7								5.42534
	178.856	-8.25097		56138.6	56432.7	55837.3								6.67359
	178.987	-8.1768		56145.3	56436.1	55838.5								0.659951
	179	-8.121		56145.9	56436.4	55838.6								12.6185
	179.25	-7.98562		56158.6	56443.3	55838.6								12.5099
	179.5	-7.92902		56171.1	56450.6	55838.6								7.17346
	179.644	-8.09818		56178.2	56455.1	55838.6								4.62533
	179.737	-8.1174		56182.9	56458	55838.6								0.646242
	179.75	-8.0984		56183.5	56458.4	55838.6								2.88262
	179.808	-8.1875		56186.4	56460.2	55838.6								7.70213
	179.963	-8.25437		56194.1	56468.5	55838.6								1.83909
	180	-8.3236		56195.9	56470.9	55838.6								1.88931
	180.038	-8.26707		56197.8	56473.4	55838.6								6.9178
	180.177	-8.3783		56204.7	56482.5	55838.6								3.63923
	180.25	-8.45127		56208.4	56487.3	55838.6								6.54555
	180.381	-8.5651		56214.9	56496	55838.6								0.851083
	180.398	-8.70927		56215.8	56497.1	55838.6								1.65333
	180.431	-8.92927		56217.4	56499.3	55838.6								3.46259
[truncated: 2,153 more rows]
